# Supplementary material for: Study of Photosynthesis-Light Response Curves in <em>Olea europaea </em>L. subsp <em>europaea </em>Cultivars and Their Adaptation to Climate Change
Source: Preprints.org preprint supplement (doi:10.20944/preprints202310.0039.v1), 2023-10-02
Supplement: Supplementary file 3 [file supplementary]

## Sheet: Table_1 Parameters P_I Curve
Cultivar	Condition	Pmax	φ_PSII	Rd	ISAT_A50	ISAT_A99.9	Jmax	Tetha	Fv/Fm			Samples	Cultivar	Condition	Pmax	φ_PSII	Rd	ISAT_A50	ISAT_A75	ISAT_A99.9	1/φ_PSII	Jmax	Tetha	Fv_Fm
Name	Symbol	µmol CO2 m⁻² s⁻¹	µmol CO2/µmol photons	µmol CO2 m⁻² s⁻¹	µmol photons m⁻² s⁻¹	µmol photons m⁻² s⁻¹	µmol CO2 m⁻² s⁻¹	-	-				Name	Symbol	µmol CO2 m⁻² s⁻¹	µmol CO2/µmol photons	µmol CO2 m⁻² s⁻¹	µmol photons m⁻² s⁻¹	µmol photons m⁻² s⁻¹	µmol photons m⁻² s⁻¹	µmol photons/µmol CO2	µmol CO2 m⁻² s⁻¹	-	-
AE	Control	11,154 ± 1,721	0,049 ± 0,004	0,907 ± 0,045	144,98 ± 7,25	925,11 ± 46,26	205,467 ± 30,958	0,246 ± 0,012	0,827 ± 0,041				AE	Control	9.85048	0.0447773	0.0423656	86.7298	152.64	593.4	22.3327	201.438	0.230115	0.832309
	MD	4,873 ± 1,536	0,046 ± 0,012	1,159 ± 0,059	80,46 ± 5,8	425,66 ± 27,92	86,888 ± 38,261	0,213 ± 0,01	0,83 ± 0,041				AE	Control	12.687	0.0525704	1.06895	146.529	246.871	927.742	19.0221	183.747	0.283434	0.832309
	SD	1,552 ± 0,404	0,034 ± 0,008	0,957 ± 0,076	66,66 ± 10,99	289,82 ± 51,57	27,653 ± 6,903	0,35 ± 0,055	0,801 ± 0,03				AE	Control	13.0106	0.0449768	0.98464	173.885	294.387	1110.68	22.2337	249.268	0.240032	0.807986
AO	Control	9,164 ± 2,012	0,033 ± 0,009	0,802 ± 0,04	114,3 ± 5,72	888,91 ± 44,45	222,425 ± 46,271	0,189 ± 0,009	0,829 ± 0,041				AE	Control	9.06883	0.0522592	1.37416	113.857	184.958	673.734	19.1354	171.298	0.232423	0.832309
	MD	3,871 ± 0,953	0,045 ± 0,011	0,846 ± 0,071	72,04 ± 6,41	415,74 ± 42,28	75,704 ± 37,616	0,146 ± 0,008	0,775 ± 0,038				AE	Control	11.1542	0.0492039	1.06367	203.914	347.793	1319.98	20.3236	221.582	0.242424	0.832309
	SD	2,597 ± 0,681	0,045 ± 0,007	0,888 ± 0,044	96,79 ± 20,47	458,98 ± 84,19	47,887 ± 18,505	0,192 ± 0,005	0,751 ± 0,036			Mean	AE	Control	11.1542	0.0487575	0.906759	144.983	245.33	925.109	20.6095	205.467	0.245686	0.827444
C	Control	10,918 ± 2,092	0,044 ± 0,006	0,77 ± 0,039	143,76 ± 7,19	921,94 ± 46,1	193,878 ± 44,339	0,118 ± 0,006	0,836 ± 0,042			St.desv	AE	Control	1.72076	0.00377941	0.505627	46.564	79.284	301.493	1.61107	30.9583	0.0217133	0.0108774
	MD	6,916 ± 1,881	0,051 ± 0,011	0,587 ± 0,687	95,23 ± 36,38	611,31 ± 255,71	86,649 ± 15,553	0,154 ± 0,285	0,806 ± 0,039			RSD	AE	Control	0.15427	0.0016902	0.226123	20.8241	35.4569	134.832	0.720493	13.845	0.00971048	0.00486454
	SD	6,452 ± 1,984	0,043 ± 0,006	0,105 ± 0,12	86,8 ± 8,46	611,12 ± 89,57	81,536 ± 26,508	0,348 ± 0,085	0,818 ± 0,039				AE	MD	6.10415	0.029839	1.8924	160.387	241.426	815.378	33.5132	104.865	0.135826	0.832309
CH	Control	14,82 ± 1,716	0,056 ± 0,004	0,584 ± 0,029	180,81 ± 9,04	1202,99 ± 60,15	200,454 ± 37,884	0,266 ± 0,013	0,804 ± 0,04				AE	MD	5.71411	0.0519673	1.71115	115.17	182.753	651.45	19.2429	153.023	0.226921	0.832309
	MD	1,501 ± 0,488	0,033 ± 0,007	0,705 ± 0,02	54,51 ± 6,44	273,74 ± 37,39	56,931 ± 26,192	0,17 ± 0,012	0,701 ± 0,038				AE	MD	6.28224	0.058699	0.491064	64.5211	109.08	411.073	17.0361	64.5507	0.307987	0.832309
	SD	1,428 ± 0,168	0,03 ± 0,006	0,72 ± 0,022	32,87 ± 2,12	148,39 ± 10,81	42,238 ± 11,269	0,113 ± 0,012	0,723 ± 0,031				AE	MD	6.49479	-	1.07861	61.1061	105.673	405.418	-	52.9016	0.342795	0.832309
CJ	Control	3,688 ± 1,83	0,04 ± 0,005	0,605 ± 0,038	161,57 ± 11,7	810,92 ± 57,54	90,085 ± 10,998	0,059 ± 0,009	0,8 ± 0,037				AE	MD	7.59318	0.041758	1.19768	81.4073	131.818	478.777	23.9475	92.3562	0.274126	0.832309
	MD	1,799 ± 0,454	0,046 ± 0,007	0,727 ± 0,057	51,91 ± 4,05	273,21 ± 27,7	63,049 ± 19,887	0,34 ± 0,034	0,781 ± 0,706				AE	MD	4.48151	0.0584069	0.328755	45.9976	77.9769	294.511	17.1213	100.67	-	0.832309
	SD	1,046 ± 0,083	0,045 ± 0,003	0,79 ± 0,038	6,36 ± 1,38	33,07 ± 7,19	57,17 ± 6,376	0,179 ± 0,037	0,648 ± 0,028				AE	MD	3.32876	0.0279488	1.85317	124.008	168.885	501.075	35.7797	-	0.274526	0.832309
E	Control	12,986 ± 2,395	0,051 ± 0,007	0,559 ± 0,031	126,14 ± 5,22	824,96 ± 33,13	181,259 ± 28,284	0,268 ± 0,013	0,826 ± 0				AE	MD	4.31274	0.0549249	1.38058	46.3507	57.5884	144.319	18.2067	39.8504	0.195324	0.832309
	MD	2,395 ± 1,663	0,061 ± 0,007	1,102 ± 0,08	56,53 ± 3,68	318,9 ± 22,9	132,452 ± 51,907	-0,025 ± 0,01	0,754 ± 0,029				AE	MD	2.26241	0.0429982	0.732834	41.898	62.6815	210.255	23.2568	-	0.260105	0.823086
	SD	1,373 ± 0,336	0,068 ± 0,007	0,892 ± 0,042	23,07 ± 3,24	90,35 ± 12,48	82,638 ± 2,828	0,394 ± 0,03	0,738 ± 0,03			Mean	AE	MD	4.87259	0.0458178	1.18514	82.3162	126.431	434.695	23.513	86.8882	0.252201	0.831284
F	Control	2,15 ± 0,81	0,047 ± 0,007	0,969 ± 0,056	180,66 ± 7,65	553,9 ± 51,08	232,878 ± 46,382	0,06 ± 0,006	0,82 ± 0			St.desv	AE	MD	1.53559	0.0122137	0.580151	41.7225	61.35	210.36	7.36715	38.261	0.0652228	0.00307415
	MD	5,224 ± 1,001	0,054 ± 0,01	0,323 ± 0,036	136,59 ± 24,43	951,65 ± 187,5	69,465 ± 16,203	0,398 ± 0,049	0,781 ± 0			RSD	AE	MD	0.31515	0.00431819	0.259451	18.6589	27.4365	94.0757	2.60468	14.4613	0.0326114	0.0013748
	SD	1,694 ± 0,477	0,063 ± 0,009	0,586 ± 0,045	100,68 ± 23	695,17 ± 178,6	1,217 ± 0,563	0,603 ± 0,04	0,714 ± 0,018				AE	SD	3.32876	0.0279488	1.85317	124.008	168.885	501.075	35.7797	31.7587	0.274526	0.832309
H	Control	11,354 ± 1,656	0,035 ± 0,004	0,577 ± 0,026	65,91 ± 5,82	405,85 ± 40,55	260,433 ± 36,286	-0,019 ± 0,001	0,808 ± 0,039				AE	SD	1.71781	-	1.38058	46.3507	57.5884	144.319	-	39.8504	0.195324	0.832309
	MD	2,74 ± 0,811	0,051 ± 0,013	0,669 ± 0,05	59,77 ± 6,87	348,66 ± 50,47	51,517 ± 24,784	0,363 ± 0,033	0,804 ± 0,037				AE	SD	2.26241	0.0429982	0.732834	41.898	62.6815	210.255	23.2568	23.0449	0.260105	0.832309
	SD	1,223 ± 0,327	0,03 ± 0,009	0,675 ± 0,045	50,51 ± 3,4	253,06 ± 30,64	35,645 ± 9,714	-0,177 ± 0,076	0,804 ± 0,037				AE	SD	1.79238	0.0227593	0.793118	71.6847	102.045	322.296	43.9381	21.7815	0.278512	0.832309
K	Control	7,573 ± 2,002	0,017 ± 0,006	0,552 ± 0,056	212,37 ± 10,48	1294,77 ± 71,76	345,323 ± 55,737	0,093 ± 0,008	0,799 ± 0,039				AE	SD	1.08407	-	0.922147	0.551635	0.672561	1.61304	-	-	0.170367	0.579912
	MD	6,815 ± 1,25	0,045 ± 0,01	0,628 ± 0,034	79,9 ± 5,63	509,29 ± 39,43	89,605 ± 39,406	0,151 ± 0,016	0,696 ± 0,038				AE	SD	1.58504	0.0388277	0.692808	36.9293	52.6838	166.867	25.7548	24.7425	0.264999	0.832309
	SD	1,053 ± 0,094	0,048 ± 0,011	0,784 ± 0,024	27,57 ± 2,29	157,91 ± 13,52	30,181 ± 9,282	0,295 ± 0,029	0,68 ± 0,039				AE	SD	1.60347	0.0425313	0.867868	38.5249	52.7741	157.965	23.5121	-	-	0.832309
M	Control	2,958 ± 0,97	0,047 ± 0,004	0,647 ± 0,034	118,4 ± 7,61	702,87 ± 50,74	47,736 ± 17,872	1,614 ± 0,159	0,803 ± 0,04				AE	SD	1.36489	0.0315118	0.570769	273.878	393.722	1259.37	31.7342	-	-	0.832309
	MD	9,553 ± 2,204	0,046 ± 0,008	0,664 ± 0,021	112,85 ± 3,88	699,7 ± 42,45	127,622 ± 36,468	-0,012 ± 0,006	0,772 ± 0,002				AE	SD	1.00935	-	0.963693	0.0712085	0.0823395	0.170373	-	24.7425	0.142721	0.832309
	SD	4,432 ± 1,285	0,038 ± 0,008	0,944 ± 0,047	78,13 ± 4,36	414,46 ± 24,04	95,963 ± 29,357	0,124 ± 0,007	0,784 ± 0,038			Mean	AE	SD	1.55243	0.0344295	0.975221	70.4329	99.0149	307.104	30.6626	27.6534	0.226651	0.804265
MS	Control	3,037 ± 0,103	0,038 ± 0,011	1,295 ± 0,073	89,2 ± 4,71	445,16 ± 18,33	104,968 ± 9,452	0,161 ± 0,009	0,804 ± 0,04			St.desv	AE	SD	0.403933	0.00830798	0.400756	84.8753	121.718	388.907	8.16865	6.9034	0.0559238	0.0841321
	MD	3,934 ± 0,79	0,048 ± 0,008	1,631 ± 0,108	92,36 ± 5,28	452,34 ± 30,5	116,479 ± 31,064	0,222 ± 0,021	0,804 ± 0			RSD	AE	SD	0.260194	0.00339172	0.179224	37.9574	54.4341	173.924	3.33484	2.8183	0.0322876	0.037625
	SD	1,96 ± 0,926	0,054 ± 0,01	1,047 ± 0,068	45,14 ± 2,61	232,42 ± 18,01	81,762 ± 27,592	0,254 ± 0,018	0,782 ± 0,036				AO	Control	9.85781	0.0459729	1.24921	136.749	225.079	829.398	21.7519	174.239	0.23752	0.829394
P	Control	12,649 ± 3,061	0,054 ± 0,007	0,936 ± 0,044	127,06 ± 6,12	809,74 ± 39,21	132,237 ± 54,636	0,258 ± 0,012	0,8 ± 0,04				AO	Control	11.2066	0.0283942	0.289926	106.82	389.907	1505.04	35.2185	284.86	0.211158	0.82936
	MD	5,059 ± 2,95	0,041 ± 0,011	0,593 ± 0,057	94,83 ± 18,33	620,94 ± 153,3	64,61 ± 14,538	0,16 ± 0,021	0,787 ± 0,034				AO	Control	6.42712	0.0273157	0.875772	151.705	248.428	911.391	36.6089	208.176	0.177549	0.82936
	SD	1,179 ± 0,156	0,04 ± 0,016	0,755 ± 0,035	58,09 ± 18,18	284,67 ± 93,27	46,717 ± 3,518	1,755 ± 0,383	0,623 ± 0,023				AO	Control	9.16386	0.0312021	0.791422	61.9343	92.5164	309.803	32.0491	222.425	0.129084	0.82936
S1	Control	8,078 ± 1,688	0,035 ± 0,01	0,667 ± 0,039	107,51 ± 5,47	640,18 ± 34,6	186,121 ± 25,637	0,213 ± 0,01	0,835 ± 0,042			Mean	AO	Control	9.16386	0.0332212	0.801584	114.302	238.982	888.908	31.4071	222.425	0.188828	0.829369
	MD	4,1 ± 1,073	0,049 ± 0,008	0,763 ± 0,064	52,76 ± 3,06	303,85 ± 19,77	35,041 ± 18,394	0,191 ± 0,009	0,733 ± 0,036			St.desv	AO	Control	2.01199	0.00865751	0.394873	39.5864	121.81	489.567	6.71367	46.2712	0.0467837	1.68995e-05
	SD	2,201 ± 1,025	0,047 ± 0,008	0,838 ± 0,038	32,33 ± 1,98	173,7 ± 13,92	27,916 ± 4,443	0,329 ± 0,024	0,724 ± 0,034			RSD	AO	Control	0.219557	0.00432876	0.176593	17.7036	54.4751	218.941	3.35683	23.1356	0.0209223	7.55769e-06
S2	Control	12,153 ± 1,82	0,045 ± 0,003	0,75 ± 0,042	157,14 ± 8,06	879,79 ± 39,22	253,289 ± 52,388	0,209 ± 0,011	0,82 ± 0				AO	MD	3.94496	0.0260476	0.878553	107.694	168.806	594.635	38.3913	-	0.151688	0.82936
	MD	4,177 ± 0,704	0,046 ± 0,006	0,728 ± 0,036	71,24 ± 3,54	415,7 ± 21,02	83,876 ± 19,123	0,226 ± 0,01	0,764 ± 0,038				AO	MD	3.80609	0.055232	1.17862	54.0066	81.3075	274.65	18.1055	-	-	0.82936
	SD	3,54 ± 0,894	0,046 ± 0,007	0,76 ± 0,032	64,17 ± 3,22	364,21 ± 17,79	54,196 ± 16,032	0,242 ± 0,013	0,778 ± 0,038				AO	MD	4.21922	0.0408941	-0.630066	142.675	280.39	1171.9	24.4534	155.208	0.186805	0.713785
													AO	MD	7.29328	0.0589688	1.06221	80.604	131.343	479.749	16.9581	80.8822	0.287305	0.828226
													AO	MD	4.82713	0.0363489	2.23339	182.545	283.023	986.168	27.5112	47.9891	0.106755	0.691939
													AO	MD	1.31133	0.0290069	0.921488	57.0095	73.5669	199.225	34.4746	111.792	0.0644936	-
													AO	MD	1.84332	0.0493173	0.821492	34.1454	48.5451	153.069	20.2769	84.1228	0.265573	-
													AO	MD	4.4328	-	0.729108	0.0254761	0.0342971	0.0999418	-	59.217	0.180586	-
													AO	MD	3.42347	0.0512518	0.907832	49.812	76.5234	264.137	19.5115	42.2333	0.24995	0.82936
													AO	MD	5.01192	0.0539826	0.774753	61.1271	99.1417	360.622	18.5245	57.4087	0.279102	0.737639
													AO	MD	3.33065	0.048785	0.752238	48.7186	76.2482	268.19	20.4981	42.4787	0.252568	0.76135
												Mean	AO	MD	3.87106	0.0449835	0.87542	74.3966	119.903	432.04	23.8705	75.7036	0.202483	0.777627
												St.desv	AO	MD	0.953033	0.0113491	0.654996	51.7826	90.6654	358.702	7.37697	37.6162	0.0769686	0.0583968
												RSD	AO	MD	0.246194	0.00358891	0.292923	23.1579	40.5468	160.416	2.3328	12.5387	0.0344214	0.0337154
													AO	SD	3.42347	0.0512518	0.907832	49.812	76.5234	264.137	19.5115	42.2333	0.24995	0.82936
													AO	SD	2.24485	0.0539826	0.774753	61.1271	99.1417	360.622	18.5245	57.4087	0.279102	0.737639
													AO	SD	3.33065	0.048785	0.752238	48.7186	76.2482	268.19	20.4981	42.4787	0.252568	0.76135
													AO	SD	2.86177	0.0382038	1.04195	62.3932	91.7369	301.628	26.1754	77.9577	0.160868	0.82936
													AO	SD	2.50536	0.0545781	1.03531	40.414	58.2157	186.686	18.3224	23.2168	0.25485	0.744117
													AO	SD	2.641	0.0364113	1.02388	96.8246	153.335	545.546	27.464	-	0.196886	0.744458
													AO	SD	1.24158	0.0408734	0.656181	457.801	630.17	1899.81	24.4658	41.4817	0.215118	0.703197
													AO	SD	2.08945	0.0419765	0.780362	41.8998	61.3611	200.803	23.8229	30.6105	0.211241	0.608191
													AO	SD	3.0347	0.0381305	1.08698	65.8528	97.0674	320.102	26.2257	67.7078	0.176364	0.82936
												Mean	AO	SD	2.59698	0.0449103	0.895499	102.76	149.311	483.058	22.7789	47.8869	0.221883	0.754115
												St.desv	AO	SD	0.681184	0.00723775	0.158085	134.224	182.508	541.658	3.59063	18.5053	0.0397946	0.0719279
												RSD	AO	SD	0.262299	0.00241258	0.0706979	60.0269	81.6199	242.237	1.19688	6.5426	0.0177967	0.0321671
													C	Control	12.7508	0.0455993	0.253487	157.332	275.268	1065.45	21.9302	203.676	0.265257	0.836429
													C	Control	9.01994	0.0422788	1.29139	138.647	226.217	827.241	23.6525	143.68	0.248591	0.836163
													C	Control	12.7057	0.0362707	-0.0634037	191.26	339.832	1330.35	27.5705	249.193	0.244392	0.836163
													C	Control	9.19372	0.0509702	1.59921	87.7958	134.758	464.728	19.6193	178.965	0.210784	0.836163
												Mean	C	Control	10.9175	0.0437797	0.770172	143.759	244.019	921.942	23.1931	193.878	0.242256	0.836229
												St.desv	C	Control	2.09211	0.006155	0.800164	43.1995	86.4321	367.606	3.35358	44.3395	0.0228343	0.000133
												RSD	C	Control	0.191629	0.0030775	0.357844	19.3194	38.6536	164.399	1.67679	22.1697	0.0102118	5.94794e-05
													C	MD	8.048	0.0321101	0.0970407	139.7	245.595	953.994	31.1428	108.696	0.226784	0.836219
													C	MD	7.1099	0.0616937	0.213556	65.6362	114.132	439.713	16.2091	67.4608	0.328766	0.836163
													C	MD	5.12832	0.0490546	0.392637	62.907	106.448	401.45	20.3854	-	0.350141	0.836163
													C	MD	3.49133	0.0506387	0.359455	42.7811	71.33	265.755	19.7477	-	0.322456	0.836163
													C	MD	5.25858	0.0503662	0.741382	166.321	285.506	1089.09	19.8546	-	-	0.754425
													C	MD	7.6948	0.0444252	0.255836	99.0271	171.862	661.155	22.5097	104.568	0.276706	0.836153
													C	MD	8.61616	0.0479934	0.120614	100.299	176.117	683.509	20.8362	86.9273	0.330089	0.762821
													C	MD	5.92403	0.0499052	1.92501	94.6333	141.512	474.438	20.038	88.8714	0.213164	0.762794
													C	MD	9.20344	0.0762819	1.73862	82.5885	131.624	471.132	13.1093	75.2642	0.35008	0.836153
													C	MD	8.68465	0.0491164	0.0904333	98.3589	173.093	672.869	20.3598	74.7533	0.351413	0.759403
												Mean	C	MD	6.91592	0.0511586	0.593458	95.2252	161.722	611.311	20.4193	86.6487	0.305511	0.805646
												St.desv	C	MD	1.88066	0.0114088	0.681725	36.3823	64.637	255.707	4.61423	15.5535	0.0537039	0.0394717
												RSD	C	MD	0.271932	0.00360777	0.304877	16.2706	28.9066	114.355	1.45915	5.87867	0.0240171	0.0176523
													C	SD	5.92403	0.0499052	1.92501	94.6333	141.512	474.438	20.038	88.8714	0.213164	0.762794
													C	SD	9.20344	0.0411853	1.73862	82.5885	131.624	471.132	24.2805	53.468	0.35008	0.836153
													C	SD	8.68465	0.0491164	0.0904333	98.3589	173.093	672.869	20.3598	74.7533	0.351413	0.759403
													C	SD	5.28913	0.038763	0.264716	43.0482	71.9781	268.803	25.7978	70.6302	0.346058	0.836069
													C	SD	10.1148	0.0419843	0.167215	135.008	236.694	917.545	23.8184	59.3245	0.27495	0.836219
													C	SD	3.41141	0.0490386	0.376762	43.5411	72.2996	268.437	20.3921	63.5306	0.432191	0.836153
													C	SD	6.04301	0.0329804	-0.562352	31.5099	59.3893	241.977	30.321	-	0.211611	0.836163
													C	SD	2.89855	0.0393571	0.78457	55.259	84.6758	291.503	25.4084	119.709	0.150157	0.836163
													C	SD	6.61141	0.0204544	-3.24185	221.023	483.031	2135.29	48.8892	122.003	0.335768	0.836163
												Mean	C	SD	6.45244	0.0427913	0.171458	89.4411	161.589	638	23.802	75.7553	0.296155	0.819476
												St.desv	C	SD	1.98427	0.00606097	1.50638	59.5055	133.586	604.734	3.52408	22.5366	0.0896707	0.0331075
												RSD	C	SD	0.307523	0.00202032	0.673673	26.6117	59.7415	270.445	1.17469	7.96791	0.0401019	0.0148061
													CH	Control	12.4798	0.053403	0.12235	237.59	417.175	1619	18.7255	352.462	0.17556	0.804343
													CH	Control	15.7895	0.0601855	0.845211	153.645	263.468	1004.19	16.6153	183.898	0.298811	0.804343
													CH	Control	16.3661	0.0580732	0.510311	160.725	279.286	1075.43	17.2197	173.666	-	0.804343
													CH	Control	14.6435	0.0503823	0.860065	171.269	292.798	1113.32	19.8482	243.798	0.258589	0.804343
												Mean	CH	Control	14.8197	0.055511	0.584484	180.807	313.182	1202.99	18.1022	238.456	0.24432	0.804343
												St.desv	CH	Control	1.7164	0.00444081	0.347847	38.5417	70.3573	281.01	1.46366	82.0571	0.0628524	2.62495e-07
												RSD	CH	Control	0.115819	0.0022204	0.155562	17.2364	31.4647	125.672	0.73183	41.0286	0.0314262	1.17391e-07
													CH	MD	1.24188	0.0240927	0.867111	64.585	83.48	226.771	41.5063	105.386	0.0700356	-
													CH	MD	1.20703	0.0311251	0.782913	0.0458646	0.0603707	0.169458	32.1284	-	-
													CH	MD	1.00106	-	0.202911	171.591	271.602	965.861	-	49.3157	-	-
													CH	MD	1.34868	0.0340845	0.845104	44.9786	59.6851	169.865	29.3388	37.1185	0.113818	0.627498
													CH	MD	2.8191	0.0453843	0.819993	47.6701	72.376	246.734	22.034	29.1025	0.258526	0.69722
													CH	MD	1.40866	0.0403661	0.778932	82.6605	134.141	488.175	24.7733	84.382	0.231942	0.670436
													CH	MD	1.8292	0.0289893	0.773421	56.1601	80.5824	257.135	34.4954	46.2023	0.0980262	0.703916
													CH	MD	1.23372	0.0273575	0.788427	0.640041	0.845435	2.3875	36.553	39.4884	0.112621	0.653695
													CH	MD	2.63175	0.0305934	0.721128	64.7857	99.1216	340.685	32.6868	64.4498	0.178619	0.653695
													CH	MD	1.60285	0.0389398	0.560132	33.7274	49.9007	165.278	25.6807	-	0.140105	0.804357
												Mean	CH	MD	1.50054	0.033437	0.714007	56.6844	85.1795	286.306	31.0219	56.9307	0.150462	0.687259
												St.desv	CH	MD	0.487769	0.00688239	0.198561	48.4203	77.3054	279.316	6.20248	26.1924	0.066772	0.0580172
												RSD	CH	MD	0.325063	0.00229413	0.0887992	21.6542	34.572	124.914	2.06749	9.2604	0.0298613	0.0259461
													CH	SD	1.23372	-	0.788427	0.640041	0.845435	2.3875	-	39.4884	0.112621	0.653695
													CH	SD	1.23443	0.0305934	0.721128	64.7857	99.1216	340.685	32.6868	64.4498	0.178619	0.653695
													CH	SD	1.60285	0.0389398	0.560132	33.7274	49.9007	165.278	25.6807	-	0.140105	0.804357
													CH	SD	1.47292	-	0.557525	0.0698501	0.102077	0.333194	-	32.9455	0.174048	0.738967
													CH	SD	1.44885	0.0293132	0.743982	48.8612	67.6454	205.643	34.1143	44.6182	0.129038	0.738967
													CH	SD	1.62462	0.0246911	0.678187	84.5502	121.584	389.051	40.5004	48.3536	0.0871135	0.80429
													CH	SD	1.38402	-	0.628305	0.0471101	0.0667555	0.209568	-	27.3048	0.173316	0.730811
													CH	SD	1.62293	0.0246091	0.967017	72.073	96.7319	280.5	40.6354	44.1554	0.0749431	0.804357
													CH	SD	1.22829	-	0.794124	1.01494	1.33697	3.75785	-	36.5883	0.0675614	0.570784
												Mean	CH	SD	1.42807	0.0296293	0.715425	33.9744	48.5928	154.205	34.7235	42.238	0.126374	0.722214
												St.desv	CH	SD	0.168343	0.00585881	0.129274	34.7824	49.7268	158.793	6.21722	11.269	0.0436408	0.0815375
												RSD	CH	SD	0.117882	0.00262014	0.0578131	15.5552	22.2385	71.0142	2.78042	3.9842	0.0195168	0.0364647
													CJ	Control	2.97758	0.0370813	0.48823	316.605	511.013	1850.64	26.9677	-	0.180113	0.823895
													CJ	Control	1.22116	0.0401234	0.796927	143.631	0.375442	1.05118	24.9231	76.3413	0.285838	0.71569
													CJ	Control	3.68752	0.0325213	0.0156585	205.236	363.229	1417.88	30.7491	86.6636	0.238543	0.823895
													CJ	Control	4.33612	0.0444543	1.22397	74.1412	113.007	386.859	22.495	95.9324	0.191661	0.823895
													CJ	Control	6.21523	0.0433946	0.588449	88.0229	147.437	551.413	23.0443	101.401	0.260089	0.823895
												Mean	CJ	Control	3.68752	0.039515	0.622647	165.527	227.012	841.569	25.6359	90.0845	0.231249	0.802254
												St.desv	CJ	Control	1.83009	0.00486449	0.441485	99.0442	206.098	766.124	3.3544	10.9975	0.0448526	0.0483907
												RSD	CJ	Control	0.496293	0.00217546	0.197438	44.2939	92.1697	342.621	1.50013	5.49877	0.0200587	0.021641
													CJ	MD	2.24422	0.0216603	1.50254	124.708	162.898	451.114	46.1674	74.4015	0.424077	0.823906
													CJ	MD	1.52096	0.0578731	0.242256	78.6634	136.762	526.829	17.2792	80.0457	0.320256	0.823895
													CJ	MD	1.39915	-	0.650979	0.224452	0.31663	0.988068	-	-	0.451647	0.762907
													CJ	MD	1.92563	0.0432771	0.908722	41.8966	58.9482	183.301	23.1069	40.0566	0.227112	0.823895
													CJ	MD	1.23185	-	0.790299	0.131066	0.172968	0.487695	-	-	0.327881	0.754379
													CJ	MD	4.75512	0.0393128	0.558177	76.3149	126.242	467.213	25.437	73.4049	0.244691	-15.4819
													CJ	MD	1.58971	0.0417189	0.849311	73.1844	100.519	302.065	23.9699	86.5291	0.390842	0.823895
													CJ	MD	1.76073	0.0513931	0.495318	128.553	221.761	849.168	19.4579	64.6214	0.273114	0.823895
													CJ	MD	2.39457	0.0477115	0.728708	39.0992	59.0049	199.836	20.9593	32.426	0.232285	0.823895
													CJ	MD	2.38027	0.0368439	0.703614	49.8423	75.5122	256.833	27.1416	41.1348	0.207023	0.823895
													CJ	MD	1.16535	-	0.84456	0.198948	0.254656	0.679004	-	74.8167	0.269325	0.675434
													CJ	MD	2.17905	0.0480691	0.611955	34.4014	52.4694	179.745	20.8034	-	0.192575	0.735742
												Mean	CJ	MD	1.79923	0.0457749	0.740537	53.9348	82.9051	284.855	22.2694	61.6294	0.296735	-0.565513
												St.desv	CJ	MD	0.453532	0.00687808	0.301781	44.2001	69.669	254.017	3.2522	20.7672	0.0866076	4.6977
												RSD	CJ	MD	0.252071	0.00243177	0.134961	19.7669	31.1569	113.6	1.14982	7.34231	0.0387321	2.10087
													CJ	SD	1.16535	-	0.84456	0.198948	0.254656	0.679004	-	58.94	0.0269325	0.675434
													CJ	SD	0.973645	0.0480691	0.611955	34.4014	52.4694	179.745	20.8034	-	0.0925745	0.735742
													CJ	SD	1.01453	0.0456908	0.931223	0.0481201	0.0568792	0.125746	21.8863	54.0529	0.106245	0.486566
													CJ	SD	1.37091	0.0421919	0.672445	0.170427	0.238051	0.732845	23.7012	65.1991	0.0445719	0.726164
													CJ	SD	1.03107	-	0.916878	0.0318569	0.0381885	0.0877402	-	50.4877	0.0780523	0.635401
												Mean	CJ	SD	1.04615	0.0453173	0.795412	6.97015	10.6114	36.2741	22.1303	57.1699	0.0696752	0.651861
												St.desv	CJ	SD	0.0830502	0.00295632	0.145251	15.3347	23.3995	80.2033	1.46424	6.37621	0.0331248	0.100879
												RSD	CJ	SD	0.0793867	0.00170683	0.0649583	6.85789	10.4646	35.868	0.845379	3.18811	0.0148139	0.0451143
													E	Control	16.1631	0.0605029	0.567862	153.077	265.367	1019.99	16.5281	195.455	0.29995	0.825951
													E	Control	13.4664	0.0482645	0.499193	160.246	277.472	1065.57	20.7192	212.786	0.265354	0.825951
													E	Control	10.846	0.0501764	0.502508	125.521	216.153	826.575	19.9297	149.478	0.276259	0.825951
													E	Control	11.4681	0.0449027	0.680757	71.7477	117.493	431.044	22.2704	167.316	0.233451	0.825951
												Mean	E	Control	12.9859	0.0509616	0.56258	127.648	219.121	835.795	19.8618	181.259	0.268754	0.825951
												St.desv	E	Control	2.39502	0.00672406	0.0848926	40.1607	72.7566	289.04	2.42586	28.2837	0.0276129	0
												RSD	E	Control	0.184432	0.00336203	0.0379651	17.9604	32.5378	129.263	1.21293	14.1418	0.0123489	0
													E	MD	7.15382	0.0537514	0.928565	135.652	222.906	820.218	18.6042	193.739	0.193605	0.825951
													E	MD	3.38804	0.0617581	0.440254	89.5263	154.177	589.607	16.1922	71.4258	0.373959	0.825951
													E	MD	2.82337	0.0560045	1.18003	124.78	197.441	701.905	17.8557	149.683	0.190662	0.825951
													E	MD	5.52246	0.0587326	1.80245	75.0799	112.202	375.905	17.0263	114.962	0.347954	0.825951
													E	MD	1.04524	-	0.942534	0.108368	0.129139	0.292029	-	-	0.294767	0.720575
													E	MD	6.38708	0.0627631	2.07329	81.0971	121.289	406.705	15.9329	-	0.291669	0.825951
													E	MD	1.06076	-	0.93602	0.186016	0.223687	0.518179	-	184.638	0.344485	0.483162
													E	MD	1.85333	0.0741309	0.891883	23.7968	33.3597	103.215	13.4896	-	-	0.825951
													E	MD	1.07134	-	0.92881	0.225561	0.273102	0.643827	-	-	0.315364	0.673598
												Mean	E	MD	2.39494	0.0611901	1.12487	58.9391	93.5555	333.223	16.5168	142.889	0.294058	0.759227
												St.desv	E	MD	1.66324	0.00719064	0.503801	54.2013	88.0908	322.314	1.78993	50.6503	0.0687371	0.11819
												RSD	E	MD	0.694482	0.00293556	0.225307	24.2395	39.3954	144.143	0.730737	22.6515	0.0343686	0.0528561
													E	SD	1.06076	-	0.93602	0.186016	0.223687	0.518179	-	84.638	0.344485	0.831624
													E	SD	1.85333	0.0741309	0.891883	23.7968	33.3597	103.215	13.4896	-	-	0.825951
													E	SD	1.07134	-	0.92881	0.225561	0.273102	0.643827	-	-	0.315364	0.673598
													E	SD	1.50734	0.0629755	0.896829	82.1332	110.27	319.923	15.8792	80.638	0.295567	0.825951
													E	SD	1.12029	0.0613716	0.914754	18.6062	23.0011	56.9916	16.2942	-	-	0.825951
													E	SD	1.62569	0.0744159	0.797894	21.0274	29.3675	90.3941	13.438	-	0.226852	0.825951
												Mean	E	SD	1.37313	0.0682235	0.894365	24.3292	32.7491	95.2809	14.7753	82.638	0.295567	0.801505
												St.desv	E	SD	0.336145	0.00701746	0.0503115	30.1633	40.5681	118.282	1.52391	2.82843	0.0500219	0.0627023
												RSD	E	SD	0.244803	0.00350873	0.0225	13.4894	18.1426	52.8973	0.761956	2.82843	0.0288802	0.0280413
													F	Control	1.24794	0.0168396	1.2409	243.182	268.892	473.508	59.3838	223.052	0.0817113	0.819538
													F	Control	3.18945	0.0405746	0.901075	86.3623	115.73	334.751	24.646	295.135	0.0516135	0.819538
													F	Control	1.89914	0.0454874	0.825164	234.724	370.94	1317.1	21.9841	183.136	0.0973594	0.819538
													F	Control	2.26545	0.0551884	0.937519	169.281	52.0814	166.963	18.1198	230.189	0.19431	0.819538
												Mean	F	Control	2.15049	0.0470835	0.976164	183.387	201.911	573.081	21.5833	236.153	0.106249	0.819538
												St.desv	F	Control	0.810439	0.00743648	0.18259	72.6263	144.837	511.603	3.28152	56.2369	0.0617006	0
												RSD	F	Control	0.376862	0.00429346	0.0816569	32.4795	64.7731	228.796	1.89458	32.4684	0.0275934	0
													F	MD	13.4099	0.0544324	0.265681	138.602	242.51	938.681	18.3714	77.0393	0.288938	0.819538
													F	MD	5.35932	0.0452208	0.255372	68.9277	118.604	453.273	22.1137	70.8209	0.27696	0.813849
													F	MD	6.29024	0.0414759	0.0967885	194.129	342.424	1333.4	24.1104	-	0.252755	0.819538
													F	MD	5.57831	0.0424543	0.529668	80.7781	135.282	505.888	23.5548	90.2906	0.246446	0.819538
													F	MD	12.0035	0.055375	0.224647	121.794	213.243	825.813	18.0587	80.2935	0.355313	0.809538
													F	MD	4.75559	0.0581096	0.470724	50.5477	84.4647	315.269	17.2089	40.8571	0.325752	0.853849
													F	MD	6.42825	0.0551979	-0.568898	572.898	1076.3	4376.25	18.1166	-	0.101101	0.818492
													F	MD	3.61639	0.0692685	0.660303	35.4834	56.7312	203.667	14.4366	57.4882	0.198707	0.819538
													F	MD	4.53731	0.0648912	1.15558	33.8759	46.6057	140.394	15.4104	74.3177	0.145602	0.819538
												Mean	F	MD	5.22363	0.0540473	0.343318	144.115	257.352	1010.29	19.0424	70.1582	0.243508	0.821491
												St.desv	F	MD	1.00052	0.00961353	0.465291	169.285	321.866	1319.48	3.45545	16.2901	0.0824726	0.0126312
												RSD	F	MD	0.191538	0.00320451	0.208084	75.7063	143.943	590.092	1.15182	6.1571	0.0368829	0.00564882
													F	SD	6.42825	0.0551979	-0.568898	572.898	1076.3	4376.25	18.1166	-	0.101101	0.813849
													F	SD	1.46738	0.0692685	0.660303	35.4834	56.7312	203.667	14.4366	1.53209	0.119871	0.884919
													F	SD	2.18067	0.0648912	1.15558	33.8759	46.6057	140.394	15.4104	1.63888	0.271456	0.819538
													F	SD	2.34616	0.057	1.66649	52.4808	67.5342	181.924	17.5439	-	0.235795	0.805385
													F	SD	2.11309	0.0770287	0.262733	17.447	28.7532	106.071	12.9822	0.795817	0.133156	0.895385
													F	SD	1.03279	-	0.893109	0.0230278	0.027908	0.0659502	-	1.67773	0.150342	0.577939
													F	SD	1.72633	0.0549757	0.0532279	262.754	462.915	1801	18.1899	-	0.14425	0.819538
													F	SD	1.42973	-	0.655223	7.91068	11.1903	35.0502	-	0.442893	0.117542	0.815385
													F	SD	1.25553	-	0.752854	0.0758817	0.101701	0.294242	-	-	-	0.904211
												Mean	F	SD	1.69396	0.0630603	0.614513	109.217	194.462	760.523	16.1133	1.21748	0.159189	0.815128
												St.desv	F	SD	0.476518	0.0089545	0.646062	192.167	361.122	1470.39	2.16709	0.562621	0.0610691	0.0972381
												RSD	F	SD	0.281304	0.00365566	0.288928	85.9397	161.499	657.577	0.88471	0.251612	0.0305346	0.0434862
													H	Control	12.7005	0.034388	0.538346	-203.202	-359.621	-1403.77	29.0799	277.232	0.2336	0.761003
													H	Control	10.0266	0.0402066	0.735304	103.514	171.869	638.074	24.8715	250.543	0.258377	0.824712
													H	Control	9.81876	0.0306803	0.366966	183.874	318.327	1222.3	32.5943	214.871	0.232094	0.824712
													H	Control	12.8689	0.0362642	0.692218	207.893	356.437	1358.38	27.5754	299.087	0.221781	0.824712
												Mean	H	Control	11.3537	0.0353848	0.583209	73.0198	121.753	453.745	28.5303	260.433	0.236463	0.808785
												St.desv	H	Control	1.65598	0.0039644	0.167122	189.48	330.631	1277.15	3.22057	36.2862	0.015525	0.0318545
												RSD	H	Control	0.145854	0.0019822	0.0747393	84.7379	147.863	571.16	1.61028	18.1431	0.00694299	0.0142458
													H	MD	3.87487	0.040947	0.295909	56.9296	96.3441	363.378	24.4218	54.6931	0.262951	-
													H	MD	2.75392	0.0462703	0.0826822	178.86	315.714	1230.03	21.6122	38.3032	0.268786	0.811697
													H	MD	3.4206	0.0553745	0.769766	44.04	68.953	242.624	18.0588	45.1437	0.33328	0.807117
													H	MD	4.99319	0.0576742	0.795547	57.3093	92.7213	336.522	17.3388	27.3418	0.362499	0.847117
													H	MD	2.30047	0.0333295	1.49389	80.8463	106.387	298.479	30.0035	92.1027	0.399107	0.824712
													H	MD	2.4777	-	0.892765	0.0451477	0.055576	0.13637	-	-	0.326471	0.728371
													H	MD	1.61038	0.0708494	0.492841	17.7415	26.7532	90.5307	14.1144	-	-	-
												Mean	H	MD	2.73966	0.0507408	0.689057	62.2531	100.99	365.957	20.9249	51.5169	0.325516	0.803803
												St.desv	H	MD	0.811095	0.0133638	0.459685	57.9921	102.43	403.513	5.70224	24.7838	0.0528717	0.044935
												RSD	H	MD	0.296057	0.00545575	0.205577	25.9349	45.8079	180.457	2.32793	11.0837	0.0264359	0.0224675
													H	SD	2.30047	0.0333295	1.49389	80.8463	106.387	298.479	30.0035	52.1027	0.299107	0.824712
													H	SD	1.07931	-	0.892765	0.0451477	0.055576	0.13637	-	31.235	0.326471	0.728371
													H	SD	1.61038	0.0261424	0.492841	17.7415	26.7532	90.5307	38.252	36.6185	-	-
													H	SD	1.51635	0.0276765	1.04356	67.679	87.8012	240.142	36.1317	29.9678	0.242624	0.824712
													H	SD	0.836579	0.019177	0.250697	33.8091	51.128	173.553	52.1457	28.2992	0.194045	0.824712
													H	SD	1.07155	0.0428401	0.0137807	113.59	200.999	784.511	23.3426	-	0.303699	0.824712
												Mean	H	SD	1.22283	0.0298331	0.697922	52.2851	78.854	264.559	35.9751	35.6447	0.273189	0.805443
												St.desv	H	SD	0.327497	0.00884916	0.547925	42.6019	71.3441	275.893	10.7464	9.71395	0.0539432	0.0430851
												RSD	H	SD	0.267818	0.00395747	0.24504	19.0521	31.906	123.383	4.80592	4.34421	0.0269716	0.0215425
													K	Control	7.57344	0.0184866	0.424745	126.011	165.927	466.049	54.0932	265.656	-	0.813653
													K	Control	5.69827	0.0122507	0.339074	274.339	468.795	1781.89	81.6279	404.631	0.129619	0.813714
													K	Control	8.15138	0.0192072	0.579934	96.5983	163.965	619.908	52.0637	288.569	0.292492	0.813714
													K	Control	6.63652	0.0252727	0.496807	305.434	481.078	1702.67	39.5684	371.475	-	0.813714
													K	Control	6.15897	0.0101576	0.229489	318.188	577.236	2293.13	98.4489	386.062	0.142978	0.772454
													K	Control	11.222	0.0399777	1.34187	177.554	293.367	1084.63	25.014	355.546	0.194326	0.7696
												Mean	K	Control	7.57344	0.017075	0.568653	216.354	358.395	1324.71	65.1604	343.279	0.189853	0.799475
												St.desv	K	Control	2.00206	0.00601801	0.397895	95.5786	175.617	718.526	24.126	62.0643	0.0738922	0.0220541
												RSD	K	Control	0.264352	0.00269134	0.177944	42.7441	78.5381	321.334	10.7895	27.756	0.0369461	0.00986289
													K	MD	9.09746	0.0511195	0.513215	104.582	179.033	681.471	19.562	122.121	0.278281	-
													K	MD	8.86541	0.0433588	0.330712	117.465	203.366	780.901	23.0634	149.663	0.253753	-
													K	MD	6.72324	0.0432037	0.470507	92.9207	157.827	597.024	23.1461	80.0067	0.295037	-
													K	MD	7.65369	0.0498425	0.715084	94.2357	157.953	591.084	20.0632	81.6359	0.307346	0.769015
													K	MD	6.94546	-	0.766315	4.03517	5.39463	15.5443	-	-	0.618835	0.646376
													K	MD	7.71364	0.0233411	0.187173	186.922	326.168	1259.93	42.843	-	0.187482	0.699105
													K	MD	5.10964	0.0555745	1.09343	64.7412	101.909	360.472	17.9939	60.2092	0.265454	0.813653
													K	MD	5.60713	0.0481727	0.894045	77.0598	124.668	452.443	20.7586	43.9971	0.303213	0.64183
													K	MD	5.90364	-	0.794517	0.0399115	0.0521458	0.144466	-	-	-	0.64183
												Mean	K	MD	6.81523	0.0449447	0.640555	82.4446	139.597	526.557	23.9186	89.6054	0.313675	0.701968
												St.desv	K	MD	1.25005	0.0104705	0.287471	57.1858	100.141	388.423	8.54783	39.4056	0.129125	0.0738927
												RSD	K	MD	0.18342	0.00395749	0.128561	25.5743	44.7845	173.708	3.23077	16.0873	0.0645625	0.0301666
													K	SD	5.10964	0.0555745	1.09343	64.7412	101.909	360.472	17.9939	26.7756	0.265454	0.813653
													K	SD	0.922746	0.0481727	0.894045	77.0598	124.668	452.443	20.7586	43.9971	0.303213	0.64183
													K	SD	1.1878	-	0.794517	0.0399115	0.0521458	0.144466	-	24.032	0.167941	0.64183
													K	SD	1.03633	0.0567491	0.915167	0.0334738	0.0402402	0.0931425	17.6214	-	0.221968	0.664139
													K	SD	1.06137	0.0324504	0.197975	32.2749	51.4992	184.541	30.8162	-	-	0.664139
													K	SD	1.05684	-	0.88659	0.02837	0.0347573	0.0843379	-	25.9204	0.165082	0.672859
												Mean	K	SD	1.05302	0.0482367	0.796954	29.0296	46.3672	166.296	21.7975	30.1813	0.224732	0.683075
												St.desv	K	SD	0.0942075	0.011188	0.30923	34.9714	56.0004	201.382	6.17316	9.2816	0.0604329	0.0652296
												RSD	K	SD	0.0894645	0.005594	0.138292	15.6397	25.0441	90.0607	3.08658	4.6408	0.0302164	0.0291716
													M	Control	2.1812	0.0417242	0.771406	100.416	148.301	490.164	23.9669	67.5825	0.35854	0.772229
													M	Control	2.64643	0.0495079	0.552842	201.164	349.452	1345.31	20.1988	42.7109	0.467581	0.832093
													M	Control	4.0457	0.0486666	0.629018	60.8589	94.2181	327.804	20.548	32.9136	0.288508	0.806955
												Mean	M	Control	2.95778	0.0466329	0.651089	120.813	197.324	721.092	21.5712	47.7357	0.371543	0.803759
												St.desv	M	Control	0.970459	0.00427184	0.110941	72.3425	134.493	546.649	2.08206	17.8723	0.0902419	0.0300597
												RSD	M	Control	0.328104	0.00246635	0.0496143	32.3525	60.1473	244.469	1.20208	10.3186	0.0403574	0.0134431
													M	MD	11.6774	0.0499542	0.0402519	128.945	227.902	888.749	20.0183	129.139	0.324265	0.752065
													M	MD	10.2335	0.0401974	-0.0951538	138.27	246.349	966.281	24.8772	137.719	0.295922	0.754448
													M	MD	8.48087	0.051434	0.256688	169.979	298.021	1155.32	19.4424	184.051	0.316968	0.832103
													M	MD	3.68153	0.0580948	1.41139	53.9402	78.6663	256.149	17.2132	-	0.302606	0.754598
													M	MD	9.52666	0.0513705	0.824402	112.898	189.966	713.144	19.4664	111.774	0.282721	0.760226
													M	MD	12.5273	0.0459898	0.175985	152.19	267.226	1037.07	21.7439	154.693	0.268849	0.832103
													M	MD	8.48087	0.0383897	1.29186	62.4422	84.583	248.88	26.0486	62.1619	0.129828	0.832093
													M	MD	5.94364	0.0443761	1.39923	96.6082	150.507	526.974	22.5347	102.598	0.224952	0.708013
													M	MD	5.77602	0.0335747	0.798741	111.178	181.867	666.576	29.7844	138.841	0.200826	0.727613
												Mean	M	MD	9.55289	0.0459313	0.678155	114.05	191.676	717.683	22.3477	127.622	0.260771	0.772585
												St.desv	M	MD	2.20415	0.00765555	0.602586	38.7	76.9355	327.184	3.94224	36.4685	0.0639773	0.0474926
												RSD	M	MD	0.230732	0.00255185	0.269485	17.3072	34.4066	146.321	1.31408	12.8935	0.0286115	0.0158309
													M	SD	4.0251	0.0383897	1.29186	62.4422	84.583	248.88	26.0486	62.1619	0.129828	0.832093
													M	SD	5.94364	0.0443761	1.39923	96.6082	150.507	526.974	22.5347	102.598	-	0.708013
													M	SD	5.77602	0.0335747	0.798741	111.178	181.867	666.576	29.7844	138.841	0.200826	0.727613
													M	SD	2.66221	0.0471997	1.38619	56.2358	77.6408	235.09	21.1866	83.3839	0.182411	0.776255
													M	SD	6.36471	0.0369544	0.505115	103.977	175.665	661.639	27.0604	118.478	0.233327	0.702685
													M	SD	5.69775	0.0423374	0.408436	80.5196	136.631	516.437	23.6198	68.4143	0.276506	0.832093
													M	SD	3.03961	0.0463656	1.13858	55.2521	80.8774	264.522	21.5677	-	0.252299	0.832093
													M	SD	4.64662	0.0212245	0.814526	70.6633	95.1545	277.393	47.1154	125.038	-	0.832103
													M	SD	3.66395	0.0358189	0.896878	74.56	115.642	403.092	27.9182	68.7884	0.203902	0.832093
												Mean	M	SD	4.43186	0.0384712	0.959951	79.0485	122.063	422.289	27.4262	95.963	0.2113	0.786116
												St.desv	M	SD	1.28541	0.0080552	0.367233	20.6676	40.7901	176.123	7.96216	29.3573	0.0483987	0.058257
												RSD	M	SD	0.290039	0.00268507	0.164232	9.24282	18.2419	78.7647	2.65405	10.3794	0.0241994	0.019419
													MS	Control	2.99462	0.0510115	1.27924	88.0106	139.716	498.239	19.6034	108.817	0.233321	0.804328
													MS	Control	2.9625	0.0407733	1.60596	74.3222	101.779	304.501	24.5259	103.38	0.125531	0.804379
													MS	Control	4.45276	0.0375182	1.19669	88.8584	136.282	469.6	26.6537	114.975	0.17916	0.804328
													MS	Control	3.15398	0.024251	1.13055	107.644	158.65	523.113	41.2355	92.6986	0.114409	0.804328
												Mean	MS	Control	3.03703	0.0383885	1.30311	89.7087	134.107	448.863	28.0046	104.968	0.163105	0.804341
												St.desv	MS	Control	0.102542	0.0110401	0.210861	13.6872	23.6899	98.6941	9.30165	9.45183	0.0546848	2.55e-05
												RSD	MS	Control	0.0337639	0.00552007	0.0943001	6.12112	10.5945	44.1373	4.65083	4.72591	0.0244558	1.14039e-05
													MS	MD	5.3744	0.0391987	3.22599	150.675	201.896	583.911	25.511	99.6562	0.151713	0.843278
													MS	MD	3.74241	0.0378333	0.787519	69.3752	109.394	387.602	26.4318	63.1461	0.222518	0.827808
													MS	MD	5.23432	0.0404588	2.63494	126.379	175.646	536.943	24.7165	157.169	-	0.832781
													MS	MD	3.41606	0.0492599	1.69488	142.271	230.07	834.651	20.3005	146.886	0.214032	0.807808
													MS	MD	4.95933	0.0527953	0.943828	64.4032	102.57	366.892	18.9411	111.452	0.273005	0.827808
													MS	MD	4.19531	0.0435554	2.17507	95.7806	132.351	401.246	22.9593	123.444	0.135649	0.808085
													MS	MD	3.53882	0.0563663	1.20046	92.9251	151.064	550.63	17.7411	113.603	0.256933	0.81455
													MS	MD	3.19357	0.04922	1.81569	68.5415	92.9326	273.85	20.3169	-	0.163432	0.804715
													MS	MD	3.19117	0.0590195	0.55909	36.4426	58.483	210.686	16.9436	-	-	0.802781
												Mean	MS	MD	3.93387	0.047523	1.67083	94.0881	139.379	460.712	21.5402	116.479	0.202469	0.818846
												St.desv	MS	MD	0.79026	0.00768844	0.893717	38.7912	55.4414	188.421	3.48477	31.0638	0.0532953	0.0144293
												RSD	MS	MD	0.200886	0.00256281	0.399682	17.348	24.7942	84.2643	1.16159	11.741	0.0266476	0.00480976
													MS	SD	7.99597	0.0563663	1.20046	92.9251	151.064	550.63	17.7411	113.603	0.256933	0.804328
													MS	SD	3.19357	0.04922	1.81569	68.5415	92.9326	273.85	20.3169	48.1992	0.163432	0.804328
													MS	SD	3.19117	0.0590195	0.55909	36.4426	58.483	210.686	16.9436	78.4587	-	0.804328
													MS	SD	6.92202	0.0498115	0.814282	87.7021	145.06	536.792	20.0757	105.267	0.252565	0.804328
													MS	SD	1.7064	0.0363793	0.675439	40.49	58.745	190.074	27.4882	-	-	0.804328
													MS	SD	2.11678	0.0549722	1.54061	64.8439	95.6194	315.477	18.191	63.2832	0.216451	0.804328
													MS	SD	1.0241	-	0.912269	0.0291475	0.0349154	0.0800669	-	-	0.177876	0.700787
													MS	SD	1.00868	-	0.94829	0.0464666	0.0542434	0.115606	-	-	0.256142	0.72633
													MS	SD	1.47593	0.0697587	1.11845	29.0051	36.6733	95.4076	14.3351	-	0.320832	0.804328
												Mean	MS	SD	1.95952	0.0536468	1.06495	46.6695	70.9629	241.457	19.2988	81.7623	0.23489	0.784157
												St.desv	MS	SD	0.925707	0.0102476	0.405966	34.3435	55.3814	203.336	4.1341	27.5916	0.0537475	0.0405317
												RSD	MS	SD	0.472416	0.00387324	0.181554	15.3589	24.7673	90.9347	1.56254	12.3393	0.0268737	0.0135106
													P	Control	16.4172	0.0528791	0.901711	173.756	304.829	1182.26	18.9111	214.995	0.290159	0.808028
													P	Control	11.8147	0.0418271	1.04146	78.1599	122.209	429.445	23.908	110.122	0.191197	0.818561
													P	Control	13.1195	0.0491581	0.628615	155.268	267.129	1020.77	20.3425	110.122	0.191197	0.818561
													P	Control	8.81701	0.0583146	1.15605	96.9126	159.136	585.21	17.1484	205.231	0.264787	0.835408
													P	Control	8.74542	0.0621464	1.18909	90.7017	148.554	545.063	16.091	88.4274	0.293624	0.777381
													P	Control	15.7618	0.0582051	0.994279	160.391	273.511	1037.91	17.1806	81.8979	0.31979	0.769129
													P	Control	13.8641	0.0554945	0.705835	145.861	250.504	955.927	18.0198	114.863	0.269165	0.780782
												Mean	P	Control	12.6485	0.0540036	0.945293	128.721	217.982	822.369	18.8002	132.237	0.259988	0.801121
												St.desv	P	Control	3.06063	0.00680413	0.214099	38.8228	72.5196	294.593	2.63883	54.6358	0.050315	0.025273
												RSD	P	Control	0.241975	0.00257172	0.0957482	17.3621	32.4317	131.746	0.997383	20.6504	0.0225016	0.0113024
													P	MD	2.56037	0.0381409	1.09617	60.1096	86.0637	273.869	26.2186	57.9783	0.16462	-
													P	MD	2.30999	0.04284	1.49614	63.0155	82.9748	233.046	23.3427	54.5724	0.12578	-
													P	MD	2.30999	0.04284	1.49614	63.0155	82.9748	233.046	23.3427	54.5724	0.12578	-
													P	MD	5.52157	0.0396267	-1.5139	429.659	848.09	3553.66	25.2355	-	-	0.818561
													P	MD	9.19051	0.0632988	0.587297	86.0792	146.719	556.557	15.7981	66.9325	0.346498	0.818561
													P	MD	8.73543	0.0354025	0.00835908	135.696	240.208	937.802	28.2466	88.9937	0.29301	0.818561
													P	MD	4.78686	-	0.8957	0.0184734	0.0222802	0.0520081	-	-	0.255803	0.64604
													P	MD	1.39728	-	0.774047	11.5332	15.7232	46.7235	-	-	0.166472	0.818561
													P	MD	1.27476	0.0277517	0.867872	56.1573	73.0517	200.795	36.0338	-	-	0.818561
												Mean	P	MD	5.05925	0.0414144	0.634203	100.587	175.092	670.617	25.4597	64.6099	0.211138	0.789807
												St.desv	P	MD	2.95045	0.0109523	0.925343	129.524	262.042	1117.83	6.0898	14.5383	0.0873228	0.0704314
												RSD	P	MD	0.583179	0.00413957	0.413826	57.9249	117.189	499.908	2.30173	6.5017	0.0436614	0.0287535
													P	SD	1.0227	-	0.8957	0.0184734	0.0222802	0.0520081	-	44.2291	0.460119	0.64604
													P	SD	1.39728	-	0.774047	11.5332	15.7232	46.7235	-	-	0.360119	0.818561
													P	SD	1.27476	0.0277517	0.867872	56.1573	73.0517	200.795	36.0338	49.2043	0.335231	0.818561
													P	SD	1.26961	-	0.757839	2.72325	3.65354	10.5877	-	-	0.41721	0.233577
													P	SD	0.976325	0.0386323	0.93847	0.0236267	0.0271913	0.0554127	25.8851	-	0.295524	0.638218
													P	SD	1.65873	0.0308967	0.505561	418.46	631.368	2137.81	32.3659	-	-	0.818561
													P	SD	1.07343	0.0633483	0.585685	26.2864	40.4592	139.929	15.7858	-	-	0.818561
													P	SD	1.24062	-	0.76463	0.070229	0.0935455	0.267924	-	-	-	0.276919
												Mean	P	SD	1.17924	0.0401573	0.761226	64.4091	95.5499	317.028	27.5176	46.7167	0.373641	0.633625
												St.desv	P	SD	0.15571	0.0161225	0.149875	144.373	218.05	739.534	8.87566	3.51805	0.0654546	0.246187
												RSD	P	SD	0.132042	0.00806124	0.0670264	64.5657	97.5151	330.73	4.43783	2.48763	0.0462834	0.0870404
													S1	Control	6.97003	0.018886	0.688199	88.1374	131.373	438.842	52.9494	220.487	0.274397	0.835408
													S1	Control	7.243	0.0274112	0.483991	157.194	267.481	1013.29	36.4815	162.62	-	0.832309
													S1	Control	10.0202	0.0462921	0.947003	133.003	222.799	833.328	21.6019	190.16	0.200127	0.835408
													S1	Control	7.33687	0.0322912	0.578295	58.3459	91.7158	323.982	30.9682	171.216	0.245875	0.835374
												Mean	S1	Control	8.07775	0.0353315	0.674372	109.17	178.342	652.36	29.6839	174.665	0.240133	0.834625
												St.desv	S1	Control	1.68777	0.00980077	0.199995	44.346	80.8958	324.777	7.52244	14.0907	0.0374667	0.00154392
												RSD	S1	Control	0.20894	0.00565848	0.0894406	19.8322	36.1777	145.245	4.34308	8.13526	0.0187333	0.00069046
													S1	MD	6.25399	0.0637021	0.757713	62.2115	102.702	379.429	15.6981	33.4283	0.37744	0.835408
													S1	MD	3.90936	0.0466072	0.481782	113.563	187.266	691.179	21.4559	-	-	0.835374
													S1	MD	4.17752	0.0460392	0.383269	55.5757	93.2411	349.192	21.7206	32.1089	0.331224	0.767656
													S1	MD	4.41321	-	0.798327	0.0797936	0.104511	0.290813	-	-	-	0.613866
													S1	MD	2.94347	0.0506772	1.57128	58.825	80.81	242.898	19.7327	18.013	0.435671	0.724063
													S1	MD	5.28543	0.051143	0.590165	64.7751	107.487	398.857	19.553	69.4994	0.269015	0.613866
													S1	MD	3.75123	-	0.913956	0.15388	0.18821	0.454871	-	36.3493	-	0.648273
													S1	MD	2.57365	0.0361393	0.781828	55.4463	83.6945	283.529	27.6707	20.8473	0.269685	0.760593
													S1	MD	5.74907	0.0466603	0.722798	78.4871	129.253	476.508	21.4315	-	0.246413	0.835408
												Mean	S1	MD	4.10037	0.0487098	0.777902	54.3464	87.1941	313.593	21.0375	35.041	0.321575	0.737167
												St.desv	S1	MD	1.07265	0.00824956	0.341046	35.6449	58.8216	219.118	3.58729	18.394	0.0739412	0.0928075
												RSD	S1	MD	0.261599	0.00311804	0.15252	15.9409	26.3058	97.9923	1.35587	7.50933	0.0369706	0.0309358
													S1	SD	1.0842	-	0.913956	0.15388	0.18821	0.454871	-	-	-	0.648273
													S1	SD	2.57365	0.0361393	0.781828	55.4463	83.6945	283.529	27.6707	-	0.269685	0.760593
													S1	SD	2.20139	0.0466603	0.722798	78.4871	129.253	476.508	21.4315	28.8845	0.246413	0.835408
													S1	SD	2.53361	0.0451843	0.898182	46.2053	68.2141	225.366	22.1316	31.7954	0.230791	0.766074
													S1	SD	4.27268	0.0583059	0.644499	48.0419	78.0707	284.474	17.1509	23.0695	0.376833	0.835408
													S1	SD	1.91215	-	0.927378	0.0152749	0.0176111	0.0360998	-	-	0.34182	0.607793
													S1	SD	0.996871	-	0.910705	0.020079	0.0237871	0.0529212	-	-	0.478331	0.542543
													S1	SD	2.03655	0.0466327	0.946441	40.7813	57.5417	179.615	21.4442	-	-	0.835408
												Mean	S1	SD	2.20139	0.0465845	0.843223	33.6439	52.1254	181.254	21.9658	27.9164	0.323979	0.728937
												St.desv	S1	SD	1.02462	0.00788132	0.112171	29.965	47.8597	172.627	3.75213	4.44277	0.0944295	0.114838
												RSD	S1	SD	0.465445	0.00352463	0.0501644	13.4008	21.4035	77.2011	1.678	2.56503	0.0472148	0.0406015
													S2	Control	10.8737	0.0422459	0.70691	150.516	201.756	583.849	23.6709	235.821	0.195975	0.820094
													S2	Control	11.3485	0.0449688	1.04753	154.67	259.413	971.262	22.2376	312.179	0.195411	0.880094
													S2	Control	14.2366	0.048911	0.523379	167.112	289.414	1111.59	20.4453	211.867	0.238272	0.812009
												Mean	S2	Control	12.153	0.0453752	0.759274	157.432	250.194	888.9	22.118	253.289	0.209886	0.837399
												St.desv	S2	Control	1.82007	0.00335107	0.265971	8.63597	44.55	273.34	1.61614	52.388	0.0245847	0.0371951
												RSD	S2	Control	0.149764	0.00193474	0.118946	3.86212	19.9233	122.241	0.933077	30.2462	0.0109946	0.0166342
													S2	MD	3.18843	-	0.493878	89.0013	144.327	524.904	-	117.454	0.161599	0.820094
													S2	MD	5.25834	0.0480729	0.887367	73.1862	117.836	425.789	20.8017	81.2529	0.241577	0.769823
													S2	MD	3.73556	0.056874	1.12141	70.9915	113.055	404.369	17.5827	72.6935	0.26485	0.753078
													S2	MD	3.83311	0.0405071	0.69213	64.1673	102.696	369.032	24.687	67.2039	0.22427	0.73404
													S2	MD	4.75785	0.043696	0.651655	70.2612	115.015	421.809	22.8854	70.9305	0.248749	0.820094
													S2	MD	3.81737	-	0.262648	48.6102	80.5503	298.546	-	-	0.229	0.693981
													S2	MD	4.89299	0.0463384	0.770403	69.7484	112.956	410.322	21.5804	73.956	0.244949	0.820094
													S2	MD	5.01538	0.0396594	1.04425	88.4706	139.656	495.347	25.2147	103.641	0.205604	0.720954
												Mean	S2	MD	4.17724	0.045858	0.740468	71.8046	115.761	418.765	22.1253	83.876	0.227575	0.76652
												St.desv	S2	MD	0.703875	0.00629632	0.282645	12.9779	20.0626	70.0952	2.80601	19.1225	0.032036	0.0495627
												RSD	S2	MD	0.168502	0.00257046	0.126403	5.80387	8.97226	31.3475	1.14555	7.22764	0.0143269	0.0175231
													S2	SD	2.29931	-	0.262648	48.6102	80.5503	298.546	-	40.5969	0.229	0.693981
													S2	SD	4.89299	0.0463384	0.770403	69.7484	112.956	410.322	21.5804	73.956	0.244949	0.820094
													S2	SD	3.36451	0.0396594	1.04425	88.4706	139.656	495.347	25.2147	-	0.205604	0.720954
													S2	SD	3.05516	0.0374086	0.853483	61.8756	94.4372	323.746	26.7318	56.7304	-	0.761263
													S2	SD	5.43879	0.0387591	0.530253	86.5213	144.696	540.456	25.8004	51.8564	0.23902	0.820094
													S2	SD	3.10329	0.049796	0.541341	75.056	126.162	473.22	20.0819	77.107	0.278069	0.744129
													S2	SD	1.80704	0.0558911	1.06841	35.1305	47.2305	137.333	17.8919	-	0.254298	0.820094
													S2	SD	3.54093	0.0433567	0.94583	61.0347	93.6802	323.057	23.0645	40.485	0.247944	0.820094
													S2	SD	4.52232	0.0544158	0.928354	57.949	91.6078	325.374	18.377	38.6387	0.296679	0.820094
												Mean	S2	SD	3.53979	0.0457031	0.771664	64.9329	103.442	369.711	22.3428	54.1958	0.249445	0.780088
												St.desv	S2	SD	0.893626	0.00713054	0.272574	17.2253	30.8631	123.805	3.40625	16.0324	0.0281451	0.0506964
												RSD	S2	SD	0.252452	0.00252103	0.121899	7.70337	13.8024	55.3671	1.20429	6.05968	0.0125869	0.0168988

## Sheet: Table_2 Parameters ETR_I Curve
Cultivar	Condition	ETR_max	Alpha-ETR (α)	ETRd	Fv/Fm	ΔF/Fm'			Sample	Cultivar	Condition	ETR_max	Alpha-ETR (α)	ETRd	1/Alpha_ETR	Fv_Fm	ΔF/Fm'
Name	Symbol	µmol e⁻ m⁻² s⁻¹	µmol e⁻ / µmol photons	µmol e⁻ m⁻² s⁻¹	-	-				Name	Symbol	µmol e⁻ m⁻² s⁻¹	µmol e⁻ / µmol photons	µmol e⁻ m⁻² s⁻¹	µmol photons/µmol e⁻	-	-
AE	Control	72,384 ± 3,619	0,34 ± 0,028	0,868 ± 0,043	0,827 ± 0,041	0,583 ± 0,029			1	AE	Control	72.3837	0.362846	0.730185	2.75599	0.832309	0.541331
	MD	42,381 ± 1,782	0,337 ± 0,027	0,499 ± 0,035	0,83 ± 0,041	0,599 ± 0,026			2	AE	Control	85.3512	0.368348	0.868234	2.71482	0.832309	0.568427
	SD	25,022 ± 1,329	0,295 ± 0,056	0,028 ± 0,012	0,832 ± 0	0,561 ± 0,029			3	AE	Control	87.0776	0.330865	1.13158	3.02238	0.807986	0.560858
AO	Control	55,025 ± 2,751	0,332 ± 0,028	0,72 ± 0,036	0,829 ± 0,041	0,552 ± 0,028			4	AE	Control	44.7222	0.299018	0.41532	3.34429	0.832309	0.646912
	MD	32,991 ± 1,695	0,316 ± 0,018	0,135 ± 0,011	0,769 ± 0,038	0,533 ± 0,028			5	AE	Control	72.3837	0.339063	1.19585	2.9493	0.832309	0.595617
	SD	26,883 ± 1,29	0,295 ± 0,025	-0,069 ± 0,006	0,742 ± 0,036	0,505 ± 0,023			Mean	AE	Control	72.3837	0.340028	0.868234	2.95736	0.827444	0.582629
C	Control	69,242 ± 3,462	0,341 ± 0,009	0,963 ± 0,048	0,836 ± 0,042	0,631 ± 0,032			St.desv	AE	Control	16.9501	0.0277913	0.316572	0.251683	0.0108774	0.0408721
	MD	68,213 ± 3,75	0,322 ± 0,023	0,487 ± 0,032	0,804 ± 0,039	0,603 ± 0,032			RSD	AE	Control	0.234171	0.0124287	0.141575	0.112556	0.00486454	0.0182786
	SD	74,262 ± 4,323	0,331 ± 0,024	0,588 ± 0,039	0,809 ± 0,039	0,576 ± 0,03			4	AE	MD	41.8891	0.307485	0.359788	3.25219	0.832309	0.542675
CH	Control	88,941 ± 4,447	0,334 ± 0,016	1,248 ± 0,062	0,804 ± 0,04	0,549 ± 0,027			5	AE	MD	58.872	0.33153	0.411002	3.01632	0.832309	0.611192
	MD	22,959 ± 1,107	0,316 ± 0,03	0,076 ± 0,003	0,715 ± 0,037	0,536 ± 0,027			6	AE	MD	56.1367	0.358943	0.888671	2.78596	0.832309	0.608707
	SD	26,166 ± 1,505	0,305 ± 0,044	0,244 ± 0,018	0,709 ± 0,034	0,519 ± 0,025			4	AE	MD	55.853	0.368349	0.960293	2.71482	0.832309	0.608928
CJ	Control	36,096 ± 2,116	0,321 ± 0,024	0,342 ± 0,019	0,824 ± 0	0,551 ± 0,027			5	AE	MD	44.0298	0.33825	0.360463	2.95639	0.832309	0.627924
	MD	37,68 ± 3,184	0,345 ± 0,03	0,436 ± 0,056	0,808 ± 0,038	0,556 ± 0,025			6	AE	MD	51.9789	0.378643	1.00507	2.64101	0.832309	0.588548
	SD	19,892 ± 1,14	0,301 ± 0,044	0,032 ± 0,004	0,77 ± 0,039	0,506 ± 0,026			4	AE	MD	19.9841	0.300586	0.0530146	3.32684	0.832309	0.623537
E	Control	94,477 ± 4,915	0,348 ± 0,008	1,26 ± 0,064	0,826 ± 0	0,565 ± 0,028			5	AE	MD	19.4504	0.322302	0.322744	3.10268	0.832309	0.611643
	MD	39,42 ± 1,703	0,334 ± 0,031	0,377 ± 0,03	0,814 ± 0,037	0,539 ± 0,028			6	AE	MD	39.0944	0.323884	0.270775	3.08752	0.832309	0.55158
	SD	2,089 ± 0,109	0,296 ± 0,042	0,17 ± 0,009	0,462 ± 0,029	0,516 ± 0,026			Mean	AE	MD	43.032	0.336664	0.514647	2.98708	0.832309	0.597193
F	Control	31,334 ± 1,781	0,315 ± 0,03	0,441 ± 0,023	0,82 ± 0	0,539 ± 0,027			St.desv	AE	MD	14.8836	0.0269583	0.34404	0.235931	1.64127e-07	0.0304978
	MD	58,055 ± 3,746	0,34 ± 0,026	0,663 ± 0,045	0,814 ± 0,039	0,586 ± 0,03			RSD	AE	MD	0.345872	0.0120561	0.153859	0.105512	7.33997e-08	0.013639
	SD	31,45 ± 1,628	0,333 ± 0,029	0,125 ± 0,025	0,803 ± 0,038	0,574 ± 0,028			4	AE	SD	19.9841	0.300586	0.0530146	3.32684	0.832309	0.623537
H	Control	86,028 ± 4,054	0,328 ± 0,014	0,336 ± 0,027	0,825 ± 0	0,562 ± 0,029			5	AE	SD	19.4504	0.322302	-0.322744	3.10268	0.832309	0.611643
	MD	51,045 ± 4,14	0,315 ± 0,03	0,241 ± 0,028	0,825 ± 0	0,58 ± 0,031			6	AE	SD	39.0944	0.323884	0.270775	3.08752	0.832309	0.55158
	SD	24,577 ± 1,339	0,297 ± 0,034	0,22 ± 0,02	0,825 ± 0	0,567 ± 0,029			4	AE	SD	16.2869	0.25489	-0.0446805	3.92327	0.832309	0.57612
K	Control	36,33 ± 1,909	0,292 ± 0,047	-0,172 ± 0,031	0,798 ± 0,039	0,487 ± 0,024			5	AE	SD	12.984	0.212142	-0.0081375	4.71382	0.832309	0.543885
	MD	44,383 ± 2,24	0,321 ± 0,028	0,019 ± 0,002	0,731 ± 0,036	0,48 ± 0,024			6	AE	SD	31.7205	0.34169	0.245508	2.92663	0.832309	0.533853
	SD	27,024 ± 1,756	0,325 ± 0,02	0,047 ± 0,006	0,713 ± 0,037	0,467 ± 0,024			4	AE	SD	29.0667	0.372651	0.0403615	2.68348	0.832309	0.52001
M	Control	52,981 ± 2,653	0,358 ± 0,028	0,981 ± 0,04	0,803 ± 0,04	0,569 ± 0,028			5	AE	SD	31.309	0.31324	0.0434751	3.19244	0.832309	0.543053
	MD	49,108 ± 3,406	0,32 ± 0,025	0,303 ± 0,038	0,77 ± 0,039	0,646 ± 0,033			6	AE	SD	28.735	0.21649	0.039901	4.61916	0.832309	0.56296
	SD	30,133 ± 1,68	0,303 ± 0,021	0,021 ± 0,003	0,79 ± 0,057	0,596 ± 0,037			Mean	AE	SD	25.4034	0.295319	0.0352748	3.50843	0.832309	0.56296
MS	Control	26,056 ± 1,215	0,305 ± 0,037	0,111 ± 0,011	0,792 ± 0,039	0,515 ± 0,026			St.desv	AE	SD	8.57981	0.055667	0.171953	0.737601	1.17757e-16	0.0349898
	MD	40,667 ± 2,292	0,32 ± 0,016	0,229 ± 0,008	0,804 ± 0	0,571 ± 0,027			RSD	AE	SD	0.337742	0.024895	0.0768997	0.329865	5.26625e-17	0.0156479
	SD	25,169 ± 1,488	0,323 ± 0,02	0,071 ± 0,01	0,804 ± 0	0,58 ± 0,029			1	AO	Control	67.6659	0.35444	1.44207	2.82135	0.829394	0.579808
P	Control	79,794 ± 4,098	0,336 ± 0,015	0,988 ± 0,056	0,8 ± 0,04	0,612 ± 0,031			2	AO	Control	70.2683	0.3145	0.326252	3.17965	0.82936	0.543504
	MD	45,693 ± 1,917	0,293 ± 0,034	0,232 ± 0,011	0,819 ± 0	0,593 ± 0,029			3	AO	Control	36.1462	0.303023	0.720131	3.30008	0.82936	0.545343
	SD	8,377 ± 0,506	0,263 ± 0,03	-0,089 ± 0,016	0,601 ± 0,02	0,554 ± 0,029			4	AO	Control	46.0187	0.357701	0.392066	2.79563	0.82936	0.540176
S1	Control	71,013 ± 4,031	0,356 ± 0,015	1,095 ± 0,054	0,835 ± 0,042	0,525 ± 0,024			Mean	AO	Control	55.0248	0.332416	0.720131	3.02418	0.829369	0.552208
	MD	36,105 ± 1,708	0,336 ± 0,024	0,469 ± 0,025	0,772 ± 0,035	0,494 ± 0,027			St.desv	AO	Control	16.63	0.027745	0.511198	0.254079	1.68995e-05	0.0185239
	SD	29,273 ± 1,675	0,329 ± 0,023	0,243 ± 0,02	0,794 ± 0,04	0,521 ± 0,026			RSD	AO	Control	0.302228	0.0124079	0.228615	0.113628	7.55769e-06	0.00828412
S2	Control	69,063 ± 3,335	0,344 ± 0,006	0,689 ± 0,039	0,82 ± 0	0,549 ± 0,028			1	AO	MD	34.2548	0.325929	0.297903	3.06815	0.82936	0.519941
	MD	28,509 ± 1,589	0,318 ± 0,013	0,216 ± 0,013	0,764 ± 0,038	0,513 ± 0,027			4	AO	MD	32.1586	0.33266	0.192782	3.00608	0.82936	0.602552
	SD	29,733 ± 1,606	0,328 ± 0,016	0,174 ± 0,011	0,778 ± 0,038	0,522 ± 0,025			5	AO	MD	43.5893	0.344724	0.406049	2.90087	0.713785	0.504226
									1	AO	MD	36.6623	0.307407	0.413679	3.25302	0.828226	0.534821
									4	AO	MD	23.5799	0.302142	0.0883007	3.3097	0.691939	0.519237
									5	AO	MD	37.0309	0.328725	0.145008	3.04205	0.724063	0.476327
									1	AO	MD	31.4287	0.310394	0.0941554	3.22171	0.82936	0.591462
									2	AO	MD	34.1496	0.304035	-0.180342	3.2891	0.737639	0.492536
									4	AO	MD	26.4262	0.286028	-0.152465	3.49616	0.76135	0.576498
									Mean	AO	MD	33.2534	0.315783	0.145008	3.17632	0.771676	0.535289
									St.desv	AO	MD	5.90806	0.0183762	0.21393	0.185516	0.0574693	0.0449175
									RSD	AO	MD	0.177668	0.00821808	0.0956726	0.0829654	0.025701	0.0200877
									1	AO	SD	31.4287	0.310394	0.0941554	3.22171	0.82936	0.591462
									2	AO	SD	34.1496	0.304035	-0.180342	3.2891	0.737639	0.492536
									4	AO	SD	26.4262	0.286028	-0.152465	3.49616	0.76135	0.576498
									1	AO	SD	30.3295	0.296828	-0.0830199	3.36895	0.744458	0.507839
									2	AO	SD	25.0298	0.335018	0.106781	2.98492	0.744117	0.536904
									5	AO	SD	31.5631	0.28027	-0.243154	3.56799	0.744458	0.448487
									2	AO	SD	17.5818	0.247661	-0.0185281	4.03777	0.703197	0.547334
									3	AO	SD	23.8059	0.311876	-0.0796754	3.2064	0.608191	0.371442
									6	AO	SD	23.7123	0.280281	-0.020037	3.56785	0.82936	0.498046
									Mean	AO	SD	27.1141	0.29471	-0.0640316	3.41565	0.744681	0.507839
									St.desv	AO	SD	5.20152	0.0249061	0.118451	0.301044	0.0661622	0.0676096
									RSD	AO	SD	0.191838	0.0111384	0.0529728	0.134631	0.0295886	0.0302359
									1	C	Control	82.2097	0.351139	1.47792	2.84788	0.836429	0.717683
									2	C	Control	60.4656	0.329138	0.963162	3.03824	0.836163	0.544911
									3	C	Control	89.8462	0.340156	0.842422	2.93983	0.836163	0.653951
									4	C	Control	44.4445	0.341707	0.569146	2.92648	0.836163	0.60687
									Mean	C	Control	69.2415	0.340535	0.963162	2.93811	0.836229	0.630854
									St.desv	C	Control	20.6933	0.00901589	0.380701	0.078117	0.000133	0.0731076
									RSD	C	Control	0.298857	0.00403203	0.170255	0.034935	5.94794e-05	0.0326947
									5	C	MD	46.2838	0.273132	0.293464	3.66124	0.836219	0.721638
									C2	C	MD	58.4833	0.345887	0.589588	2.89112	0.836163	0.605473
									C3	C	MD	44.9366	0.337442	0.418056	2.96347	0.836163	0.598081
									C3_rep	C	MD	40.3646	0.342712	0.45877	2.9179	0.836163	0.609039
									1	C	MD	93.6876	0.312903	0.403729	3.19588	0.754425	0.599156
									4	C	MD	100.174	0.320758	0.669881	3.11761	0.836153	0.520602
									6	C	MD	76.3763	0.322908	0.593947	3.09686	0.762821	0.621659
									3	C	MD	69.9154	0.332271	0.448004	3.00959	0.762794	0.509553
									5_a	C	MD	63.3462	0.295759	0.174524	3.38113	0.836153	0.699711
									5_b	C	MD	98.7058	0.333507	0.912417	2.99844	0.759403	0.576121
									Mean	C	MD	69.2274	0.321728	0.496238	3.12332	0.805646	0.606103
									St.desv	C	MD	22.5489	0.0226986	0.20673	0.238518	0.0394717	0.0666713
									RSD	C	MD	0.325723	0.0101511	0.0924525	0.106668	0.0176523	0.0298163
									3	C	SD	69.9154	0.332271	0.448004	3.00959	0.762794	0.509553
									5_a	C	SD	63.3462	0.295759	0.174524	3.38113	0.836153	0.699711
									5_b	C	SD	98.7058	0.333507	0.912417	2.99844	0.759403	0.576121
									3	C	SD	55.4934	0.361881	0.874395	2.76334	0.836069	0.467736
									4	C	SD	105.845	0.330352	0.707511	3.02708	0.836219	0.612476
									6	C	SD	55.8238	0.362107	0.846333	2.76161	0.836153	0.581147
									4	C	SD	70.8723	0.348029	1.35421	2.87333	0.759944	0.578684
									5	C	SD	88.1301	0.303228	0.0390105	3.29785	0.836163	0.558171
									6	C	SD	67.5321	0.310615	0.116801	3.21941	0.836163	0.624558
									Mean	C	SD	75.0737	0.330861	0.608134	3.03687	0.811007	0.578684
									St.desv	C	SD	18.2634	0.0241044	0.442393	0.223495	0.0377308	0.0665355
									RSD	C	SD	0.243273	0.0107798	0.197844	0.0999498	0.0168737	0.0297556
									1	CH	Control	88.9408	0.310027	1.24773	3.22553	0.804343	0.544584
									2	CH	Control	83.3649	0.337901	1.09	2.95944	0.804343	0.548942
									3	CH	Control	103.086	0.344811	1.39436	2.90014	0.804343	0.545309
									4	CH	Control	80.3714	0.343148	1.25884	2.91419	0.804343	0.556933
									Mean	CH	Control	88.9408	0.333972	1.24773	2.99983	0.804343	0.548942
									St.desv	CH	Control	10.0767	0.0162328	0.1245	0.152581	2.62495e-07	0.00565816
									RSD	CH	Control	0.113297	0.00725952	0.0556779	0.0682365	1.17391e-07	0.00253041
									2	CH	MD	23.7559	0.281668	0.0541459	3.55027	0.69492	0.595173
									3	CH	MD	25.9515	0.332002	0.0864117	3.01203	0.653695	0.478604
									4	CH	MD	19.4966	0.334516	0.0898736	2.9894	0.804357	0.540221
									Mean	CH	MD	23.068	0.316062	0.0768104	3.1839	0.717657	0.537999
									St.desv	CH	MD	3.28197	0.0298123	0.0197042	0.317491	0.0778617	0.0583165
									RSD	CH	MD	0.142274	0.0133325	0.00881199	0.141986	0.0348208	0.0260799
									2	CH	SD	23.7559	0.281668	0.0541459	3.55027	0.69492	0.595173
									3	CH	SD	36.0895	0.332002	0.425822	3.01203	0.653695	0.478604
									4	CH	SD	19.4966	0.334516	0.0898736	2.9894	0.804357	0.540221
									1	CH	SD	31.2576	0.361785	0.419006	2.76408	0.578824	0.458233
									2	CH	SD	24.1295	0.305889	0.12992	3.26916	0.738967	0.656844
									3	CH	SD	17.6982	0.250284	0.0677451	3.99547	0.80429	0.508626
									1	CH	SD	38.1689	0.357463	0.584199	2.79749	0.576156	0.349078
									2	CH	SD	27.2734	0.274455	0.338848	3.64358	0.804357	0.602859
									3	CH	SD	20.5422	0.247535	0.167505	4.03983	0.758186	0.514545
									Mean	CH	SD	26.4902	0.305066	0.253007	3.34015	0.712639	0.522687
									St.desv	CH	SD	7.3017	0.0438054	0.192814	0.489551	0.0924082	0.0911654
									RSD	CH	SD	0.275638	0.0195904	0.0862291	0.218934	0.0413262	0.0407704
									1	CJ	Control	33.0654		0.284673		0.823895	0.552167
									2	CJ	Control	23.096	0.286964	0.0203307	3.48475	0.823895	0.503997
									3	CJ	Control	39.4029	0.327344	0.620021	3.05489	0.823895	0.589704
									4	CJ	Control	33.9056	0.326971	0.213667	3.05838	0.823895	0.560966
									5	CJ	Control	53.2163	0.342465	0.62561	2.92001	0.823895	0.554001
									Mean	CJ	Control	36.5372	0.320936	0.352861	3.12951	0.823895	0.552167
									St.desv	CJ	Control	11.0233	0.02377	0.264749	0.245437	0	0.0308633
									RSD	CJ	Control	0.3017	0.011885	0.118399	0.122718	0	0.0138025
									2	CJ	MD	23.1478	0.293419	0.144957	3.40809	0.823906	0.543882
									C5	CJ	MD	72.0716	0.365916	1.39224	2.73287	0.823895	0.583861
									C6	CJ	MD	27.2622	0.36654	0.197355	2.72822	0.823895	0.566231
									C6_rep	CJ	MD	33.134	0.350133	0.36619	2.85605	0.823895	0.555572
									1	CJ	MD	33.4329	0.35411	0.331659	2.82398	0.823895	0.604865
									5	CJ	MD	38.3465	0.323691	0.289041	3.08936	0.808988	0.557901
									6	CJ	MD	33.1234	0.369928	0.38881	2.70323	0.823895	0.556974
									5C	CJ	MD	76.1355	0.31677	0.644561	3.15687	0.823895	0.582925
									6C	CJ	MD	37.7841	0.359858	0.507633	2.77887	0.823895	0.600155
									6C_rep	CJ	MD	32.7599	0.37263	0.505409	2.68363	0.823895	0.576184
									2	CJ	MD	20.5806	0.295216	0.0891956	3.38735	0.748053	0.456637
									4	CJ	MD	34.0007	0.373587	0.56342	2.67675	0.735742	0.509628
									Mean	CJ	MD	38.4816	0.34515	0.451706	2.91877	0.808988	0.557901
									St.desv	CJ	MD	17.4868	0.0298836	0.341472	0.271105	0.0317353	0.0409903
									RSD	CJ	MD	0.45442	0.0133644	0.152711	0.121242	0.0141925	0.0183314
									2	CJ	SD	20.5806	0.295216	0.0891956	3.38735	0.748053	0.456637
									4	CJ	SD	34.0007	0.373587	0.0290884	2.67675	0.735742	0.509628
									1	CJ	SD	10.5831	0.276062	0.0167745	3.62237	0.823906	0.482791
									2	CJ	SD	26.8993	0.300888	0.0266554	3.3235	0.823906	0.565452
									5	CJ	SD	9.50024	0.257252	0.00426103	3.88724	0.726164	0.524502
									Mean	CJ	SD	20.3128	0.300601	0.033195	3.37944	0.771554	0.507802
									St.desv	CJ	SD	10.5166	0.0442644	0.0327967	0.451066	0.0484163	0.0413798
									RSD	CJ	SD	0.517731	0.0197956	0.0146671	0.201723	0.0216524	0.0185056
									1	E	Control	91.4567	0.356405	1.64557	2.80579	0.825951	0.589961
									2	E	Control	101.998	0.347082	1.5754	2.88116	0.825951	0.575869
									3	E	Control	90.5591	0.337412	0.965107	2.96373	0.825951	0.541447
									4	E	Control	94.6714	0.350483	0.911073	2.85321	0.825951	0.557188
									Mean	E	Control	94.6714	0.347846	1.27429	2.87598	0.825951	0.566116
									St.desv	E	Control	5.19391	0.00795116	0.389888	0.0662628	0	0.0212287
									RSD	E	Control	0.0548625	0.00355587	0.174363	0.0296336	0	0.00949377
									1	E	MD	56.2532	0.314297	0.172804	3.1817	0.737781	0.540112
									2	E	MD	65.9084	0.352597	0.954567	2.8361	0.825951	0.590613
									3	E	MD	46.5542	0.336097	0.656171	2.97533	0.825951	0.538193
									4	E	MD	48.4957	0.374584	0.833679	2.66963	0.825951	0.507056
									5	E	MD	35.0629	0.340113	0.410027	2.9402	0.825951	0.559489
									6	E	MD	57.2258	0.36619	0.339744	2.73083	0.825951	0.55193
									1	E	MD	5.64308		0.00125893		0.825951	0.504542
									3	E	MD	34.8568	0.289135	0.156667	3.45859	0.81493	0.540112
									4	E	MD	12.9203	0.297232	0.0124209	3.36438	0.825951	0.52896
									Mean	E	MD	40.3245	0.333781	0.393038	3.01959	0.81493	0.540112
									St.desv	E	MD	20.3435	0.0312216	0.350817	0.289254	0.0291596	0.0263426
									RSD	E	MD	0.504495	0.0156108	0.15689	0.144627	0.0130406	0.0117808
									1	E	SD	2.26147	0.301725	0.184183	3.31427	0.825951	0.504542
									3	E	SD	1.9826	0.303233	0.156667	3.29779	0.285062	0.513522
									4	E	SD	2.34958	0.255434	0.191359	3.91491	0.825951	0.52896
									4	E	SD	1.95818	0.359601	0.157572	2.78086	0.263374	0.581345
									6	E	SD	1.93317	0.258486	0.164159	3.86868	0.175315	0.439239
									Mean	E	SD	2.097	0.295696	0.170788	3.4353	0.475131	0.513522
									St.desv	E	SD	0.193679	0.0423752	0.0159735	0.468959	0.32288	0.0510808
									RSD	E	SD	0.09236	0.0189508	0.00714357	0.209725	0.144396	0.022844
									1	F	Control	23.511	0.30987	0.0896916	3.22716	0.819538	0.543296
									2	F	Control	29.973	0.278194	0.573224	3.59461	0.819538	0.56403
									4	F	Control	42.165	0.321276	0.777774	3.11259	0.819538	0.508969
									5	F	Control	30.8484	0.350869	0.368673	2.85007	0.819538	0.543158
									Mean	F	Control	31.6244	0.315052	0.452341	3.19611	0.819538	0.539863
									St.desv	F	Control	7.75157	0.0300384	0.293845	0.309024	0	0.0228117
									RSD	F	Control	0.245114	0.0134336	0.131411	0.1382	0	0.0102017
									4	F	MD	94.8688	0.353737	1.36583	2.82696	0.819538	0.58934
									5	F	MD	51.349	0.353862	0.691807	2.82596	0.819538	0.554123
									6	F	MD	96.0573	0.330549	0.937799	3.02527	0.819538	0.63097
									2	F	MD	41.7408	0.323736	0.132542	3.08894	0.819538	0.553213
									4	F	MD	89.2097	0.351899	1.2642	2.84173	0.819538	0.5814
									5	F	MD	39.6623	0.355197	0.405332	2.81534	0.819538	0.595773
									2	F	MD	46.7558	0.286341	0.33279	3.49234	0.819538	0.576263
									5	F	MD	40.3685	0.377072	0.762463	2.65201	0.819538	0.618107
									6	F	MD	32.9482	0.329814	0.248765	3.03201	0.772548	0.472856
									Mean	F	MD	59.2178	0.340245	0.682391	2.95562	0.814317	0.574672
									St.desv	F	MD	26.168	0.0261344	0.44253	0.243598	0.0156635	0.046116
									RSD	F	MD	0.441895	0.0116877	0.197906	0.10894	0.00700492	0.0206237
									2	F	SD	46.7558	0.286341	-0.33279	3.49234	0.819538	0.576263
									5	F	SD	40.3685	0.377072	0.762463	2.65201	0.819538	0.618107
									6	F	SD	32.9482	0.329814	0.248765	3.03201	0.772548	0.468981
									4	F	SD	26.0792	0.305963	-0.0630674	3.26837	0.819538	0.56977
									5	F	SD	27.3405	0.355183	0.117697	2.81545	0.819538	0.581206
									6	F	SD	10.6001		-0.0584354		0.819538	0.579682
									2	F	SD	49.2004	0.32212	0.101298	3.10444	0.819538	0.572663
									5	F	SD	21.2746	0.340803	0.0195525	2.93424	0.819538	0.577876
									6	F	SD	33.4119	0.347595	0.458664	2.87692	0.731543	0.510208
									Mean	F	SD	31.9977	0.333111	0.13935	3.02197	0.80454	0.56164
									St.desv	F	SD	12.3302	0.0286477	0.320445	0.266489	0.0314776	0.0444308
									RSD	F	SD	0.385347	0.0143238	0.143307	0.133245	0.0140772	0.0198701
									1	H	Control	73.5168	0.315833	0.200155	3.16623	0.824712	0.578569
									2	H	Control	86.3752	0.345068	0.664453	2.89798	0.824712	0.610193
									3	H	Control	90.6566	0.316372	0.300742	3.16083	0.824712	0.524805
									4	H	Control	94.9523	0.333014	0.212881	3.00288	0.824712	0.540831
									Mean	H	Control	86.3752	0.327572	0.344558	3.05698	0.824712	0.5636
									St.desv	H	Control	9.25985	0.01413	0.217902	0.130295	0	0.0383773
									RSD	H	Control	0.107205	0.00631913	0.0974486	0.0582695	0	0.0171629
									4	H	MD	109.789	0.303611	-0.00231797	3.29369	0.824712	0.65082
									5	H	MD	50.6898	0.35	0.317825	2.85714	0.824712	0.580307
									6	H	MD	69.5662	0.3373	0.79861	2.96472	0.824712	0.550457
									2	H	MD	32.1594	0.304058	0.17967	3.28884	0.824712	0.557403
									5	H	MD	19.9139	0.266643	-0.084112	3.75034	0.824712	0.56076
									6	H	MD	32.4099	0.330259	0.316595	3.02793	0.824712	0.589123
									Mean	H	MD	52.4213	0.315312	0.254378	3.19711	0.824712	0.581478
									St.desv	H	MD	33.0324	0.030141	0.313092	0.323112	1.21619e-16	0.0369844
									RSD	H	MD	0.630133	0.0134795	0.140019	0.1445	5.43896e-17	0.0165399
									2	H	SD	32.1594	0.304058	0.17967	3.28884	0.824712	0.557403
									5	H	SD	19.9139	0.266643	-0.084112	3.75034	0.824712	0.56076
									6	H	SD	32.4099	0.330259	0.316595	3.02793	0.824712	0.589123
									2	H	SD	18.0058	0.255272	0.116777	3.91739	0.824712	0.549175
									4	H	SD	21.7789	0.327533	0.62287	3.05313	0.824712	0.581228
									Mean	H	SD	24.8536	0.296753	0.23036	3.40753	0.824712	0.567538
									St.desv	H	SD	6.91411	0.0344627	0.262614	0.406589	1.24127e-16	0.0168761
									RSD	H	SD	0.278194	0.0154122	0.117444	0.181832	5.55112e-17	0.00754721
									1	K	Control	32.9538	0.326456	0.111566	3.0632	0.813653	0.51631
									2	K	Control	37.5056	0.226297	-0.780161	4.41897	0.813714	0.467291
									4	K	Control	48.8424	0.312656	-0.12034	3.1984	0.813714	0.551464
									5	K	Control	24.5567	0.24117	0.0258592	4.14645	0.813714	0.417762
									curva_1a	K	Control	44.3381	0.30846	-0.0531341	3.24192	0.772454	0.488494
									curva_1b	K	Control	31.9934	0.33993	-0.138756	2.94179	0.766496	0.493507
									Mean	K	Control	36.6984	0.292495	-0.159161	3.50179	0.798958	0.489138
									St.desv	K	Control	8.8326	0.0470768	0.318224	0.620056	0.0229146	0.0451977
									RSD	K	Control	0.240681	0.0210534	0.142314	0.277298	0.0102477	0.020213
									3	K	MD	44.4217	0.351507	0.0220984	2.8449	0.813653	0.529529
									5	K	MD	49.3504	0.317478	-0.0262055	3.14982	0.64183	0.429441
									6	K	MD	39.8532	0.295427	0.0663844	3.38494	0.745608	0.484881
									Mean	K	MD	44.5418	0.321471	0.0207591	3.12655	0.733697	0.481284
									St.desv	K	MD	4.74978	0.0282524	0.0463095	0.270771	0.0865286	0.0501405
									RSD	K	MD	0.106636	0.0126348	0.0207102	0.121092	0.0386968	0.0224235
									3	K	SD	44.4217	0.351507	0.0535563	2.8449	0.813653	0.529529
									5	K	SD	49.3504	0.317478	-0.0262055	3.14982	0.64183	0.429441
									6	K	SD	18.947	0.295427	0.0663844	3.38494	0.745608	0.484881
									4	K	SD	10.6142	0.318996	0.0043677	3.13484	0.670613	0.442774
									5	K	SD	26.2533	0.343729	0.169062	2.90927	0.664139	0.362938
									6	K	SD	16.5017	0.321467	0.0298288	3.11074	0.759866	0.572713
									Mean	K	SD	27.6814	0.324767	0.049499	3.08908	0.715951	0.470379
									St.desv	K	SD	15.7759	0.0201631	0.0674564	0.192739	0.0672127	0.0750503
									RSD	K	SD	0.569909	0.00901723	0.0301674	0.0861956	0.0300584	0.0335635
									1	M	Control	50.8542	0.375744	1.20132	2.66139	0.772229	0.526648
									2	M	Control	53.0544	0.3262	0.618364	3.06561	0.832093	0.611488
									4	M	Control	55.2546	0.372359	1.15454	2.68558	0.806955	0.572059
									Mean	M	Control	53.0544	0.358101	0.99141	2.80419	0.803759	0.570065
									St.desv	M	Control	2.20021	0.0276791	0.323912	0.226716	0.0300597	0.0424551
									RSD	M	Control	0.0414707	0.0123785	0.144858	0.10139	0.0134431	0.0189865
									1	M	MD	69.0836	0.342204	1.02836	2.92223	0.752065	0.6426
									2	M	MD	48.6764	0.318403	0.209351	3.14068	0.754448	0.751449
									3	M	MD	49.9923	0.336406	0.345214	2.9726	0.832103	0.687022
									1	M	MD	31.9319	0.360864	0.506623	2.77113	0.754598	0.571699
									4	M	MD	53.8131	0.319286	0.156191	3.13198	0.760226	0.754746
									5	M	MD	90.1004	0.323714	0.457897	3.08914	0.832103	0.693236
									3	M	MD	23.4878	0.297015	0.0403801	3.36684	0.832093	0.575583
									4	M	MD	39.9585	0.302006	0.056985	3.31119	0.708013	0.545935
									6	M	MD	42.8863	0.277835	0.0548572	3.59926	0.727613	0.619878
									Mean	M	MD	49.9923	0.319748	0.317318	3.14501	0.772585	0.649128
									St.desv	M	MD	19.9038	0.0251949	0.318774	0.2514	0.0474926	0.0774251
									RSD	M	MD	0.398139	0.0787962	1.00459	0.0799362	0.0614724	0.119276
									3	M	SD	23.4878	0.297015	0.0403801	3.36684	0.832093	0.575583
									4	M	SD	39.9585	0.302006	0.056985	3.31119	0.708013	0.545935
									6	M	SD	42.8863	0.277835	0.0548572	3.59926	0.727613	0.619878
									2	M	SD	27.5558	0.32167	0.0270245	3.10878	0.776255	0.55858
									4	M	SD	32.0951	0.268468	0.020525	3.72484	0.702685	0.69751
									5	M	SD	30.4629	0.324448	0.0403547	3.08216	0.832093	0.54012
									1	M	SD	26.995	0.297641	0.00144966	3.35975	0.832093	0.564815
									3	M	SD	19.3333	0.332947	0.0372494	3.00348	0.832103	0.539016
									4	M	SD	31.3912	0.303943	-0.0716374	3.29009	0.832093	0.721829
									Mean	M	SD	30.4629	0.302886	0.0230209	3.31626	0.786116	0.595918
									St.desv	M	SD	7.42489	0.0212056	0.0394004	0.236607	0.058257	0.0692577
									RSD	M	SD	0.243736	0.0700117	1.71151	0.0713476	0.0741074	0.11622
									1	MS	Control	26.2412	0.351884	0.115938	2.84184	0.759882	0.515221
									2	MS	Control	27.8275	0.270896	0.0192098	3.69146	0.804379	0.519038
									3	MS	Control	31.324	0.31654	0.290782	3.15916	0.804328	0.516222
									4	MS	Control	19.5721	0.281796	0.0378224	3.54867	0.804328	0.510402
									Mean	MS	Control	26.2412	0.305279	0.115938	3.31028	0.793229	0.515221
									St.desv	MS	Control	4.92707	0.036663	0.123867	0.384878	0.0222315	0.00359603
									RSD	MS	Control	0.187761	0.0163962	0.0553948	0.172123	0.00994223	0.00160819
									1	MS	MD	42.7164	0.306925	0.375655	3.25813	0.804328	0.516115
									2	MS	MD	41.6266	0.327207	0.259164	3.05617	0.804328	0.567694
									3	MS	MD	36.8535	0.322762	0.233219	3.09826	0.804328	0.554226
									1	MS	MD	56.907	0.30229	-0.0299546	3.30809	0.804328	0.584866
									2	MS	MD	41.3921	0.333205	0.241129	3.00115	0.804328	0.569315
									3	MS	MD	32.8125	0.301194	0.290998	3.32011	0.804328	0.583688
									1	MS	MD	50.817	0.320402	0.142083	3.12108	0.804328	0.599666
									2	MS	MD	28.5606	0.316544	0.274549	3.15912	0.804328	0.585791
									3	MS	MD	37.7892	0.349078	0.31803	2.86469	0.804328	0.590795
									Mean	MS	MD	41.0528	0.319956	0.233875	3.13187	0.804328	0.572462
									St.desv	MS	MD	8.67577	0.0155316	0.117699	0.149425	0	0.025184
									RSD	MS	MD	0.211332	0.0485429	0.503259	0.047711	0	0.0439925
									1	MS	SD	25.4491	0.320402	0.142083	3.12108	0.804328	0.599666
									2	MS	SD	28.5606	0.316544	0.0314065	3.15912	0.804328	0.585791
									3	MS	SD	37.7892	0.349078	0.0805852	2.86469	0.804328	0.590795
									1	MS	SD	27.6484	0.330167	0.248384	3.02877	0.804328	0.599215
									2	MS	SD	23.014	0.315164	-0.000819206	3.17295	0.804328	0.553564
									3	MS	SD	29.5553	0.289618	0.0542439	3.45283	0.804328	0.566508
									1	MS	SD	18.2536	0.304179	0.0241194	3.28754	0.804328	0.594647
									2	MS	SD	18.4271	0.346987	0.0412014	2.88195	0.804328	0.575313
									3	MS	SD	20.3445	0.337305	0.0454549	2.96468	0.804328	0.564205
									Mean	MS	SD	25.4491	0.323272	0.0740733	3.10373	0.804328	0.581078
									St.desv	MS	SD	6.29213	0.0196508	0.076868	0.192061	0	0.0168168
									RSD	MS	SD	0.247244	0.0607874	1.03773	0.0618805	0	0.0289407
									1	P	Control	101.297	0.347526	1.42061	2.87749	0.808028	0.646169
									3	P	Control	66.2835	0.319837	0.82356	3.12659	0.818561	0.58377
									4	P	Control	97.7118	0.33181	0.998517	3.01378	0.818561	0.661497
									1_NEW	P	Control	62.0126	0.350551	0.799567	2.85265	0.835408	0.660348
									2_NEW	P	Control	64.8856	0.313916	1.004	3.18556	0.777381	0.572689
									3_NEW	P	Control	86.5351	0.337729	0.656169	2.96095	0.769129	0.593567
									4_NEW	P	Control	84.6839	0.34852	1.29783	2.86927	0.780782	0.578816
									Mean	P	Control	80.4871	0.335698	1.00004	2.98376	0.801121	0.613837
									St.desv	P	Control	16.1781	0.0145498	0.275428	0.131743	0.025273	0.0402379
									RSD	P	Control	0.201003	0.00650688	0.123175	0.0589174	0.0113024	0.0179949
									4	P	MD	69.5857	0.292461	0.387034	3.41925	0.818561	0.666444
									5	P	MD	64.6508	0.344555	0.577242	2.90229	0.818561	0.553501
									6	P	MD	67.0235	0.311028	0.292489	3.21514	0.818561	0.623595
									1	P	MD	15.783	0.245837	-0.0659997	4.06773	0.818561	0.503657
									2	P	MD	46.7339	0.292504	-0.141433	3.41876	0.818561	0.595203
									4	P	MD	16.6265	0.268636	0.412183	3.72251	0.818561	0.628818
									Mean	P	MD	46.7339	0.292504	0.243586	3.45761	0.818561	0.595203
									St.desv	P	MD	24.9772	0.0340586	0.285238	0.40313	1.21619e-16	0.0585336
									RSD	P	MD	0.534456	0.116438	1.17099	0.116592	1.48576e-16	0.0983423
									1	P	SD	15.783	0.245837	-0.0659997	4.06773	0.818561	0.503657
									2	P	SD	5.98223		-0.141433		0.818561	0.46125
									4	P	SD	16.6265	0.268636	-0.412183	3.72251	0.818561	0.628818
									3	P	SD	1.42961	0.285493	-0.0898733	3.50272	0.233577	0.605982
									5	P	SD	14.1655	0.228914	-0.0383141	4.36846	0.818561	0.555019
									6	P	SD	17.3389	0.26209	-0.00397038	3.81548	0.818561	0.55852
									1	P	SD	2.0176	0.314212	0.0985235	3.18257	0.262871	0.673287
									4	P	SD	1.20621	0.237544	-0.0744635	4.20975	0.123651	0.502079
									6	P	SD	3.68724		-0.0157839		0.818561	0.524512
									Mean	P	SD	8.69298	0.263246	-0.0826108	3.83846	0.614607	0.557014
									St.desv	P	SD	7.10355	0.0296231	0.140488	0.413967	0.308124	0.0681644
									RSD	P	SD	0.81716	0.11253	-1.7006	0.107847	0.501334	0.122375
									1	S1	Control	67.1207	0.377292	1.5206	2.65047	0.835408	0.552342
									2	S1	Control	72.2355	0.348247	0.83685	2.87153	0.832309	0.459258
									4	S1	Control	102.381	0.345017	1.50543	2.89841	0.835408	0.552688
									5	S1	Control	45.8141	0.353062	0.589414	2.83236	0.835374	0.543759
									Mean	S1	Control	71.8878	0.355904	1.11307	2.81319	0.834625	0.527012
									St.desv	S1	Control	23.3275	0.0146365	0.472771	0.111821	0.00154392	0.0453576
									RSD	S1	Control	0.324499	0.00654564	0.21143	0.0500078	0.00069046	0.0202845
									4	S1	MD	48.0002	0.364628	0.843155	2.74252	0.835408	0.608748
									5	S1	MD	43.3172	0.32939	0.520417	3.03592	0.835374	0.445558
									6	S1	MD	36.6236	0.337604	0.516711	2.96205	0.767656	0.423071
									2	S1	MD	18.3337	0.298845	0.124357	3.34621	0.835408	0.46295
									3	S1	MD	31.42	0.355733	0.654088	2.8111	0.724063	0.467265
									5	S1	MD	51.452	0.369576	0.779696	2.7058	0.613866	0.501663
									2	S1	MD	21.2184	0.30578	0.178551	3.27032	0.766716	0.451064
									4	S1	MD	33.3706	0.326712	0.48089	3.0608	0.760593	0.521331
									6	S1	MD	45.8769	0.333618	0.230145	2.99744	0.835408	0.593404
									Mean	S1	MD	36.6236	0.335765	0.48089	2.99246	0.774943	0.497228
									St.desv	S1	MD	11.6685	0.0244125	0.258544	0.220055	0.0737235	0.0658217
									RSD	S1	MD	0.318607	0.0727071	0.537637	0.0735364	0.0951341	0.132377
									2	S1	SD	21.2184	0.30578	0.178551	3.27032	0.766716	0.451064
									4	S1	SD	33.3706	0.326712	0.0625053	3.0608	0.760593	0.521331
									6	S1	SD	45.8769	0.333618	0.230145	2.99744	0.835408	0.593404
									3	S1	SD	30.576	0.350579	0.336137	2.85243	0.766074	0.488289
									4	S1	SD	15.4556	0.301889	0.269026	3.31248	0.757997	0.514964
									5	S1	SD	39.2707	0.356653	0.537793	2.80385	0.835408	0.62351
									2	S1	SD	30.0159	0.33308	0.251856	3.00228	0.764891	0.422779
									4	S1	SD	27.0143	0.299772	0.22667	3.33586	0.835374	0.544555
									6	S1	SD	24.343	0.356332	0.148834	2.80637	0.835408	0.557944
									Mean	S1	SD	29.6824	0.32938	0.249058	3.04909	0.795319	0.524204
									St.desv	S1	SD	9.20853	0.0227697	0.133245	0.213098	0.038118	0.0644426
									RSD	S1	SD	0.310236	0.0691292	0.534998	0.0698889	0.047928	0.122934
									1	S2	Control	43.719	0.340882	0.384954	2.93357	0.820094	0.559308
									2	S2	Control	72.9859	0.341298	0.664623	2.92999	0.820094	0.541222
									4	S2	Control	92.962	0.350738	1.05133	2.85113	0.820094	0.546456
									Mean	S2	Control	69.8889	0.344306	0.700301	2.9049	0.820094	0.548995
									St.desv	S2	Control	24.7672	0.00557399	0.334615	0.0465949	0	0.00930656
									RSD	S2	Control	0.354379	0.00249276	0.149645	0.0208379	0	0.00416202
									1	S2	MD	27.6272	0.324691	0.182923	3.07985	0.820094	0.410264
									3	S2	MD	29.1405	0.29733	0.203095	3.36327	0.769823	0.53537
									5	S2	MD	37.5425	0.334482	0.31791	2.9897	0.753078	0.644889
									2	S2	MD	25.7731	0.313033	0.12741	3.19456	0.73404	0.483812
									6	S2	MD	29.3658	0.325036	0.339604	3.07658	0.820094	0.558584
									1	S2	MD	21.7957	0.330104	0.0952016	3.02935	0.693981	0.460403
									2	S2	MD	29.1216	0.303779	0.135349	3.29186	0.820094	0.550447
									6	S2	MD	29.256	0.31803	0.362987	3.14436	0.720954	0.485585
									Mean	S2	MD	28.7028	0.318311	0.22056	3.14619	0.76652	0.516169
									St.desv	S2	MD	4.41915	0.0129053	0.105091	0.129876	0.0495627	0.0719319
									RSD	S2	MD	0.153962	0.0405431	0.476472	0.0412804	0.0646594	0.139357
									1	S2	SD	21.7957	0.330104	0.0952016	3.02935	0.693981	0.460403
									2	S2	SD	29.1216	0.303779	0.135349	3.29186	0.820094	0.550447
									6	S2	SD	29.256	0.31803	0.362987	3.14436	0.720954	0.485585
									1	S2	SD	26.5267	0.31621	0.0631092	3.16245	0.761263	0.511615
									2	S2	SD	29.9482	0.316579	0.179075	3.15877	0.820094	0.495072
									4	S2	SD	39.1363	0.349529	0.19455	2.86099	0.744129	0.534516
									1	S2	SD	34.5602	0.349272	0.0281932	2.8631	0.820094	0.561098
									3	S2	SD	28.4058	0.334583	0.258269	2.9888	0.820094	0.548239
									4	S2	SD	30.7832	0.337583	0.294939	2.96224	0.820094	0.567336
									Mean	S2	SD	29.9482	0.328408	0.179075	3.05132	0.780088	0.523812
									St.desv	S2	SD	4.84898	0.0158491	0.111198	0.147644	0.0506964	0.0373532
									RSD	S2	SD	0.161912	0.0482605	0.620956	0.048387	0.064988	0.0713103
																Fv_Fm	Fv_Fm_
																0.882951	0.494324
																0.882951	0.552262
																0.605418	0.536078
																0.882951	0.72008
																0.882951	0.610401
																0.827444	0.582629
																0.124117	0.0873944
																0.832309	0.614281
																0.832309	0.625246
																0.832309	0.624848
																0.832309	0.624884
																0.832309	0.622315
																2.79153e-08	0.00535896
																8.44097e-08	0.0156011
																8.44097e-08	0.0154041
																8.44097e-08	0.0155537
																7.33997e-08	0.0136944
																8.16572e-08	0.0150633
																5.50498e-09	0.000916493
																0.832309	0.524544
																0.832309	0.528069
																0.832309	0.523439
																0.832309	0.521998
																0.832309	0.524513
																0	0.00259006
																0.828916	0.542589
																0.82936	0.550301
																0.82936	0.547644
																0.829355	0.539794
																0.82936	0.54562
																0.82927	0.54519
																0.000197942	0.00412985
																0.713787	0.506749
																0.713786	0.505378
																0.696425	0.501934
																0.696425	0.487609
																0.705106	0.500418
																0.0100237	0.00877599
																0.861658	0.629078
																0.646806	0.424337
																0.837207	0.605609
																0.792194	0.455953
																0.784467	0.528744
																0.0961774	0.103561
																0.729872	0.526112
																0.74508	0.544213
																0.741473	0.52927
																0.744066	0.541841
																0.740123	0.535359
																0.00700039	0.00900005
																0.861036	0.55969
																0.837175	0.550265
																0.848384	0.549229
																0.845302	0.552313
																0.840444	0.54848
																0.836123	0.51647
																0.844744	0.546075
																0.00926363	0.0150603
																0.836217	0.735826
																0.836239	0.733384
																0.836228	0.727218
																0.836228	0.732143
																1.07627e-05	0.00443625
																0.751789	0.496564
																0.763927	0.498044
																0.751791	0.50832
																0.762791	0.494613
																0.757574	0.499386
																0.00669554	0.00611998
																0.840638	0.613473
																0.841861	0.621868
																0.838811	0.61696
																0.846266	0.626012
																0.836229	0.596721
																0.846684	0.617882
																0.836241	0.62995
																0.840961	0.617552
																0.00430308	0.0107622
																-0.110881	-0.0514841
																-0.110881	-0.0725669
																-0.103233	-0.0577394
																0.016727	0.0290816
																-0.0770672	-0.0381772
																0.0626333	0.0457025
																-826681	-17.4388
																-826680	-18.1944
																-826680	-17.6732
																-826680	-17.7688
																0.467281	0.386766
																0.749363	0.682002
																0.729158	0.675425
																0.741819	0.675701
																0.748567	0.667138
																0.844589	0.751459
																0.744676	0.667669
																0.749363	0.682002
																0.729158	0.675425
																0.756255	0.683684
																0.754772	0.6845
																0.0349074	0.0257961
																0.826756	0.545999
																0.832965	0.559516
																0.83833	0.558447
																0.836202	0.565463
																0.829783	0.559685
																0.823895	0.554276
																0.823895	0.560847
																0.823895	0.548281
																0.823895	0.55294
																0.828846	0.556162
																0.00574794	0.00629162
																0.823895	0.602262
																0.823894	0.608123
																0.823896	0.602632
																0.823896	0.605156
																0.823896	0.606604
																0.823895	0.599414
																0.826091	0.606292
																0.823895	0.606417
																0.823895	0.60277
																0.824139	0.604408
																0.000731964	0.00278727
																0.853186	0.504429
																0.677734	0.406483
																0.844293	0.577165
																0.804856	0.540328
																0.82602	0.592495
																0.853186	0.504429
																0.637923	0.551575
																0.637923	0.389635
																0.873671	0.47605
																0.778755	0.504732
																0.0982169	0.0708283
																0.825952	0.493943
																0.825952	0.496432
																0.825952	0.502063
																0.825952	0.499567
																0.825952	0.498092
																0.825951	0.509821
																0.825951	0.508322
																0.837765	0.502269
																0.825952	0.493825
																0.825952	0.502563
																0.827133	0.50069
																0.00373581	0.00546007
																-0.134191	0.594578
																-0.121201	0.588951
																-0.134191	0.590808
																-0.121201	0.588951
																0.269218	0.586338
																0.266167	0.583637
																-0.134191	0.594578
																0.258084	0.593239
																-0.134191	0.590808
																0.00158951	0.59021
																0.197268	0.00369851
																0.848889	0.571752
																0.837381	0.567674
																0.819538	0.56735
																0.835269	0.568925
																0.014789	0.00245351
																0.819539	0.581032
																0.819538	0.579327
																0.819538	0.577665
																0.819538	0.574393
																0.819538	0.579241
																0.819538	0.567887
																0.819538	0.579358
																0.819538	0.575539
																0.819538	0.573443
																0.819539	0.576431
																2.4594e-08	0.00409919
																0.7666	0.536356
																0.863423	0.641901
																0.831162	0.599309
																0.745966	0.53319
																0.745966	0.443806
																0.922316	0.708345
																0.745966	0.546001
																0.745966	0.523247
																0.745966	0.52633
																0.745966	0.540329
																0.745966	0.529964
																1.05901	0.65023
																0.805356	0.564917
																0.099201	0.0718957
																#DIV/0!	-2.69314
																#DIV/0!	-3.0111
																#DIV/0!	-2.19272
																#DIV/0!	-2.3366
																#DIV/0!	-2.54873
																#DIV/0!	-2.55646
																#DIV/0!	0.318624
																0.824712	0.557872
																0.824712	0.562204
																0.824712	0.561237
																0.824712	0.56076
																0.824712	0.556506
																0.824712	0.557693
																0.824712	0.565692
																0.824712	0.563052
																0.824712	0.561237
																0.824712	0.560695
																2.25487e-16	0.00291402
																0.812042	0.449278
																0.812042	0.451816
																0.813714	0.469359
																0.813714	0.468235
																0.813723	0.460407
																0.813047	0.459819
																0.000917443	0.0091834
																-1.96731	-1.38228
																-1.93376	-1.41353
																-2.11986	-1.38628
																0.0921791	0.051635
																0.0895588	0.0541871
																-2.20679	-1.64796
																-1.29502	-1.03948
																-1.81834	-1.35997
																-1.75403	-1.33792
																-1.43482	-1.05129
																0.902891	0.644701
																0.854792	0.631987
																0.84408	0.627585
																0.852223	0.631076
																0.852827	0.635142
																0.842295	0.617311
																0.84755	0.628892
																0.841649	0.622045
																0.836574	0.616574
																0.840686	0.623204
																0.845853	0.625979
																0.00630747	0.00655613
																0.764182	0.761289
																0.762035	0.757769
																0.761332	0.770339
																0.761011	0.755282
																0.749444	0.764814
																0.760991	0.777389
																0.759833	0.76448
																0.00522828	0.00825732
																0.850705	0.58003
																0.848199	0.568039
																0.841834	0.562466
																0.839988	0.58618
																0.842129	0.590537
																0.844571	0.57745
																0.00461662	0.0119084
																0.839907	0.565784
																0.848485	0.539058
																0.832093	0.568527
																0.840162	0.55779
																0.00819906	0.0162799
																0.807035	0.495565
																0.812547	0.519297
																0.814561	0.52374
																0.810715	0.509679
																0.80432	0.509097
																0.804328	0.509527
																0.808918	0.511151
																0.00433577	0.00976485
																0.805801	0.591043
																0.804328	0.600894
																0.804328	0.594231
																0.804328	0.596105
																0.804328	0.591703
																0.804328	0.593999
																0.804328	0.591882
																0.804328	0.589401
																0.804328	0.591563
																0.804491	0.593425
																0.000490967	0.00343934
																0.804328	0.570113
																0.804328	0.558716
																0.804328	0.560941
																0.804328	0.56015
																0.804328	0.564205
																0.804328	0.565726
																0.804328	0.563868
																0.804328	0.559532
																0.804328	0.562555
																0.804328	0.562867
																0	0.00358833
																0.025273	0.0429633
																-8.36879	-3.22346
																-8.59263	-2.60465
																-8.59263	-3.3854
																-8.95678	-3.37312
																-7.73423	-2.50155
																-7.56764	-2.69751
																-7.80341	-2.55831
																-8.22361	-2.89472
																-7.31272	-2.57731
																2.78958	1.04234
																0.818561	0.449069
																0.818561	0.4371
																0.818561	0.456154
																0.818561	0.442231
																0.818561	0.436114
																0.818561	0.442231
																0.818561	0.466873
																0.818561	0.469763
																0.818561	0.456154
																0.818561	0.450632
																2.25487e-16	0.0123907
																0.18311	-0.263047
																0.18311	-0.267534
																0.311683	-0.431228
																0.314949	-0.198876
																0.18311	-0.225229
																0.251764	-0.2656
																0.237954	-0.275253
																0.0641535	0.0811985
																0.835942	0.463494
																0.835408	0.447028
																0.835414	0.448844
																0.835543	0.452112
																0.835674	0.46903
																0.835527	0.465832
																0.835408	0.434458
																0.835414	0.465437
																0.846182	0.468366
																0.836724	0.457178
																0.00355142	0.012057
																0.765976	0.49318
																0.766898	0.483272
																0.754611	0.470121
																0.764713	0.486995
																0.776174	0.496389
																0.778705	0.502013
																0.765976	0.49318
																0.766898	0.483272
																0.754611	0.470121
																0.766063	0.486505
																0.00812072	0.0110982
																#DIV/0!	1.40906
																#DIV/0!	0.587967
																#DIV/0!	0.468523
																#DIV/0!	0.758452
																#DIV/0!	1.05228
																#DIV/0!	1.3932
																0.820094	5.49805
																0.820094	0.616804
																0.820094	0.571361
																#DIV/0!	1.37286
																#DIV/0!	1.58694
																0.633549	0.606773
																0.758822	0.494733
																0.797156	0.343069
																0.838676	0.548814
																0.633549	0.466764
																0.918874	0.569709
																0.633549	0.476824
																0.865941	0.547139
																0.760015	0.506728
																0.114646	0.0817659
																0.956897	0.641047
																0.683016	0.464938
																0.906231	0.598355
																0.822491	0.548871
																0.683016	0.580951
																0.859261	0.500837
																0.683016	0.4398
																0.683016	0.470034
																0.683016	0.424653
																0.773329	0.518832
																0.112885	0.0764417
																Fv_Fm	Fv_Fm_
																0.882951	0.494324
																0.882951	0.552262
																0.605418	0.536078
																0.882951	0.72008
																0.882951	0.610401
																0.829394	0.579808
																0.82936	0.543504
																0.82936	0.545343
																0.82936	0.540176
																0.836429	0.717683
																0.836163	0.544911
																0.836163	0.653951
																0.836163	0.60687
																0.804343	0.544584
																0.804343	0.610142
																0.804343	0.545309
																0.804343	0.556933
																0.823895	0.738055
																0.823895	0.503997
																0.823895	0.589704
																0.823895	0.560966
																0.823895	0.554001
																0.825951	0.589961
																0.825951	0.575869
																0.825951	0.541447
																0.825951	0.557188
																0.819538	0.543296
																0.819538	0.56403
																0.819538	0.508969
																0.819538	0.543158
																0.824712	0.578569
																0.824712	0.610193
																0.824712	0.524805
																0.824712	0.540831
																0.813653	0.51631
																0.813714	0.467291
																0.813714	0.551464
																0.813714	0.417762
																0.772454	0.488494
																0.766496	NA
																0.772229	0.526648
																0.832093	0.611488
																0.806955	0.572059
																0.759882	NA
																0.804379	0.519038
																0.804328	0.516222
																0.804328	0.510402
																0.808028	0.646169
																0.818561	0.58377
																0.818561	0.661497
																0.835408	0.660348
																0.777381	0.572689
																0.769129	0.593567
																0.780782	0.578816
																0.835408	0.552342
																0.832309	0.459258
																0.835408	0.552688
																0.835374	0.543759
																0.820094	0.559308
																0.820094	0.541222
																0.820094	0.546456
																0.832309	0.542675
																0.832309	0.611192
																0.832309	0.608707
																0.832309	0.608928
																0.832309	0.627924
																0.832309	0.588548
																0.832309	0.623537
																0.832309	0.611643
																0.832309	0.55158
																0.832309	0.623537
																0.832309	0.611643
																0.832309	0.55158
																0.832309	0.57612
																0.832309	0.543885
																0.832309	0.533853
																0.832309	0.52001
																0.832309	0.543053
																0.832309	NA
																0.82936	0.519941
																0.82936	0.602552
																0.713785	0.504226
																0.828226	0.534821
																0.691939	0.519237
																0.724063	0.476327
																0.82936	0.591462
																0.737639	0.492536
																0.76135	0.576498
																0.82936	0.591462
																0.737639	0.492536
																0.76135	0.576498
																0.744458	NA
																0.744117	0.536904
																0.744458	0.448487
																0.703197	0.547334
																0.608191	0.371442
																0.82936	0.498046
																0.836219	0.721638
																0.836163	0.605473
																0.836163	0.598081
																0.836163	0.609039
																0.754425	0.599156
																0.836153	0.520602
																0.762821	0.621659
																0.762794	0.509553
																0.836153	0.699711
																0.759403	0.576121
																0.762794	0.509553
																0.836153	0.699711
																0.759403	0.576121
																0.836069	0.467736
																0.836219	0.612476
																0.836153	0.581147
																0.759944	NA
																0.836163	0.558171
																0.836163	0.624558
																0.69492	0.595173
																0.653695	0.478604
																0.804357	0.540221
																0.69492	0.595173
																0.653695	0.478604
																0.804357	0.540221
																0.578824	0.458233
																0.738967	0.656844
																0.80429	0.508626
																0.576156	0.349078
																0.804357	0.602859
																0.758186	0.514545
																0.823906	0.543882
																0.823895	0.583861
																0.823895	0.566231
																0.823895	0.555572
																0.823895	0.604865
																-15.4819	1.00044
																0.823895	0.556974
																0.823895	0.582925
																0.823895	0.600155
																0.823895	0.576184
																0.748053	0.456637
																0.735742	0.509628
																0.748053	0.456637
																0.735742	0.509628
																0.823906	0.482791
																0.823906	0.565452
																0.726164	0.524502
																0.737781	NA
																0.825951	0.590613
																0.825951	0.538193
																0.825951	0.507056
																0.825951	0.559489
																0.825951	0.55193
																0.825951	0.504542
																0.285062	NA
																0.825951	0.52896
																0.825951	0.504542
																0.285062	NA
																0.825951	0.52896
																0.263374	NA
																0.175315	NA
																0.819538	0.58934
																0.819538	0.554123
																0.819538	0.63097
																0.819538	0.553213
																0.819538	0.5814
																0.819538	0.595773
																0.819538	0.576263
																0.819538	0.618107
																0.772548	NA
																0.819538	0.576263
																0.819538	0.618107
																0.772548	NA
																0.819538	0.56977
																0.819538	0.581206
																0.819538	0.579682
																0.819538	0.572663
																0.819538	0.577876
																0.194211	NA
																0.824712	0.65082
																0.824712	0.580307
																0.824712	0.550457
																0.824712	0.557403
																0.824712	0.56076
																0.824712	0.589123
																0.824712	0.557403
																0.824712	0.56076
																0.824712	0.589123
																0.824712	0.549175
																0.824712	0.581228
																0.813653	0.529529
																0.64183	0.429441
																0.745608	0.484881
																0.813653	0.529529
																0.64183	0.429441
																0.745608	0.484881
																0.670613	0.442774
																0.664139	0.362938
																0.759866	0.572713
																0.752065	0.6426
																0.754448	0.751449
																0.832103	0.687022
																0.754598	0.571699
																0.760226	0.754746
																0.832103	0.693236
																0.832093	0.575583
																0.708013	0.545935
																0.727613	0.619878
																0.832093	0.575583
																0.708013	0.545935
																0.727613	0.619878
																0.776255	0.55858
																0.702685	0.69751
																0.832093	0.54012
																0.832093	0.564815
																0.832103	0.539016
																0.832093	0.721829
																0.804328	0.516115
																0.804328	0.567694
																0.804328	0.554226
																0.804328	0.584866
																0.804328	0.569315
																0.804328	0.583688
																0.804328	0.599666
																0.804328	0.585791
																0.804328	0.590795
																0.804328	0.599666
																0.804328	0.585791
																0.804328	0.590795
																0.804328	0.599215
																0.804328	0.553564
																0.804328	0.566508
																0.804328	0.594647
																0.804328	0.575313
																0.804328	0.564205
																0.818561	0.666444
																0.818561	0.553501
																0.818561	0.623595
																0.818561	0.503657
																0.818561	0.46125
																0.818561	0.628818
																0.818561	0.503657
																0.818561	0.46125
																0.818561	0.628818
																0.233577	NA
																0.818561	0.555019
																0.818561	0.55852
																0.262871	NA
																0.123651	NA
																0.818561	0.524512
																0.835408	0.608748
																0.835374	0.445558
																0.767656	0.423071
																0.835408	0.46295
																0.724063	0.467265
																0.613866	0.501663
																0.766716	0.451064
																0.760593	0.521331
																0.835408	0.593404
																0.766716	0.451064
																0.760593	0.521331
																0.835408	0.593404
																0.766074	0.488289
																0.757997	0.514964
																0.835408	0.62351
																0.764891	0.422779
																0.835374	0.544555
																0.835408	0.557944
																0.820094	0.410264
																0.769823	0.53537
																0.753078	0.644889
																0.73404	0.483812
																0.820094	0.558584
																0.693981	0.460403
																0.820094	0.550447
																0.720954	0.485585
																0.693981	0.460403
																0.820094	0.550447
																0.720954	0.485585
																0.761263	0.511615
																0.820094	0.495072
																0.744129	0.534516
																0.820094	0.561098
																0.820094	0.548239
																0.820094	0.567336

## Sheet: Table_3 Parameters ETR_I Curve
Cultivar	Condition	NPQ	qP	qN	mol photons/mol e⁻	mol photons/mol CO2	mol e⁻/mol CO2		Sample	Cultivar	Condition	NPQ	qP	qN	mol photons/mol e⁻
Name	Symbol	-	-	-	µmol photons/µmol e⁻	µmol photons/µmol CO2	µmol e⁻/µmol CO2			Name	Symbol	-	-	-	µmol photons/µmol e⁻
AE	Control	2,469 ± 0,123	0,388 ± 0,019	0,803 ± 0,04	2,941 ± 0,028	20,179 ± 1,491	6,861 ± 0,041		1	AE	Control	3.20543	0.421184	0.85552	2.75599
	MD	2,34 ± 0,135	0,366 ± 0,019	0,788 ± 0,038	2,97 ± 0,027	23,513 ± 7,367	7,916 ± 0,199		2	AE	Control	2.76836	0.377679	0.829648	2.71482
	SD	2,863 ± 0,132	0,346 ± 0,023	0,83 ± 0,04	3,386 ± 0,056	30,663 ± 8,169	9,055 ± 0,455		3	AE	Control	2.29475	0.394363	0.803594	3.02238
AO	Control	3,1 ± 0,153	0,4 ± 0,02	0,841 ± 0,042	3,008 ± 0,028	31,407 ± 6,714	10,44 ± 0,186		4	AE	Control	1.70902	0.346866	0.725412	3.34429
	MD	2,326 ± 0,139	0,412 ± 0,021	0,777 ± 0,038	3,167 ± 0,018	23,87 ± 7,377	7,538 ± 0,136		5	AE	Control	2.36976	0.400098	0.799143	2.9493
	SD	1,834 ± 0,107	0,434 ± 0,025	0,774 ± 0,037	3,393 ± 0,025	22,779 ± 3,591	6,713 ± 0,089		Mean	AE	Control	2.46946	0.388038	0.802663	2.95736
C	Control	2,423 ± 0,121	0,352 ± 0,018	0,79 ± 0,04	2,937 ± 0,009	23,193 ± 3,354	7,898 ± 0,03		St.desv	AE	Control	0.558955	0.0277785	0.048742	0.251683
	MD	1,597 ± 0,088	0,313 ± 0,017	0,716 ± 0,036	3,108 ± 0,023	20,419 ± 4,614	6,569 ± 0,105		RSD	AE	Control	0.249972	0.0124229	0.0217981	0.112556
	SD	2,063 ± 0,107	0,373 ± 0,023	0,779 ± 0,038	3,022 ± 0,024	23,802 ± 3,524	7,875 ± 0,085		4	AE	MD	3.09054	0.397655	0.813143	3.25219
CH	Control	2,379 ± 0,119	0,336 ± 0,017	0,812 ± 0,041	2,994 ± 0,016	18,102 ± 1,464	6,046 ± 0,024		5	AE	MD	3.08222	0.428929	0.850098	3.01632
	MD	1,9 ± 0,078	0,406 ± 0,022	0,753 ± 0,038	3,164 ± 0,03	31,022 ± 6,202	9,805 ± 0,185		6	AE	MD	3.05207	0.342421	0.848407	2.78596
	SD	1,162 ± 0,061	0,414 ± 0,03	0,681 ± 0,03	3,278 ± 0,044	34,724 ± 6,217	10,593 ± 0,272		4	AE	MD	3.13732	0.430658	0.853113	2.71482
CJ	Control	2,802 ± 0,158	0,392 ± 0,02	0,831 ± 0,042	3,116 ± 0,024	25,636 ± 3,354	8,227 ± 0,08		5	AE	MD	3.09054	0.399916	0.84119	2.95639
	MD	2,392 ± 0,113	0,516 ± 0,027	0,808 ± 0,04	2,897 ± 0,03	22,269 ± 3,252	7,686 ± 0,097		6	AE	MD	0.0352949	0.0412217	0.0187991	2.64101
	SD	2,032 ± 0,101	0,361 ± 0,015	0,809 ± 0,04	3,327 ± 0,044	22,13 ± 1,464	6,652 ± 0,065		4	AE	MD	0.0157844	0.0184349	0.0084072	3.32684
E	Control	2,514 ± 0,128	0,393 ± 0,02	0,821 ± 0,041	2,875 ± 0,008	19,862 ± 2,426	6,909 ± 0,019		5	AE	MD	2.42306	0.351723	0.790272	3.10268
	MD	3,045 ± 0,151	0,464 ± 0,025	0,846 ± 0,042	2,996 ± 0,031	16,517 ± 1,79	5,513 ± 0,056		6	AE	MD	3.26237	0.358857	0.856877	3.08752
	SD	3,436 ± 0,172	0,45 ± 0,023	0,869 ± 0,043	3,382 ± 0,042	14,775 ± 1,524	4,369 ± 0,065		Mean	AE	MD	1.70068	0.32832	0.72227	2.98708
F	Control	2,71 ± 0,131	0,451 ± 0,025	0,84 ± 0,042	3,174 ± 0,03	21,583 ± 3,282	6,8 ± 0,099		St.desv	AE	MD	2.30614	0.367993	0.791669	0.235931
	MD	2,189 ± 0,109	0,374 ± 0,021	0,784 ± 0,039	2,939 ± 0,026	19,042 ± 3,455	6,479 ± 0,09		RSD	AE	MD	2.42306	0.351723	0.790272	0.105512
	SD	2,225 ± 0,1	0,438 ± 0,029	0,783 ± 0,037	3,002 ± 0,029	16,113 ± 2,167	5,368 ± 0,062		4	AE	SD	0.642896	0.0169638	0.054962	3.32684
H	Control	2,881 ± 0,138	0,438 ± 0,022	0,819 ± 0,04	3,053 ± 0,014	28,53 ± 3,221	9,346 ± 0,046		5	AE	SD	0.287512	0.00758642	0.0245797	3.10268
	MD	2,392 ± 0,098	0,433 ± 0,022	0,797 ± 0,037	3,171 ± 0,03	20,925 ± 5,702	6,598 ± 0,172		6	AE	SD	2.43787	0.324901	0.817404	3.08752
	SD	2,581 ± 0,127	0,397 ± 0,022	0,818 ± 0,041	3,37 ± 0,034	35,975 ± 10,746	10,676 ± 0,37		4	AE	SD	2.37874	0.318901	0.812339	3.92327
K	Control	2,983 ± 0,178	0,411 ± 0,015	0,865 ± 0,044	3,419 ± 0,047	65,16 ± 24,126	19,059 ± 1,136		5	AE	SD	2.42784	0.348465	0.816589	4.71382
	MD	2,1 ± 0,109	0,452 ± 0,025	0,806 ± 0,04	3,111 ± 0,028	23,919 ± 8,548	7,689 ± 0,241		6	AE	SD	2.27049	0.350659	0.803025	2.92663
	SD	1,935 ± 0,111	0,436 ± 0,021	0,793 ± 0,039	3,079 ± 0,02	21,798 ± 6,173	7,079 ± 0,124		4	AE	SD	2.37874	0.335731	0.812339	2.68348
M	Control	2,106 ± 0,104	0,474 ± 0,024	0,787 ± 0,039	2,793 ± 0,028	21,571 ± 2,082	7,725 ± 0,058		5	AE	SD	0.0766503	0.0161815	0.00659467	3.19244
	MD	0,755 ± 0,032	0,344 ± 0,024	0,457 ± 0,012	3,127 ± 0,025	22,348 ± 3,942	7,146 ± 0,099		6	AE	SD	0.0342791	0.00723659	0.00294923	4.61916
	SD	1,97 ± 0,124	0,379 ± 0,027	0,718 ± 0,048	3,302 ± 0,021	27,426 ± 7,962	8,307 ± 0,169		Mean	AE	SD	2.82182	0.394159	0.832276	3.50843
MS	Control	2,866 ± 0,145	0,363 ± 0,018	0,848 ± 0,042	3,276 ± 0,037	28,005 ± 9,302	8,549 ± 0,341		St.desv	AE	SD	3.60423	0.324024	0.87732	0.737601
	MD	2,068 ± 0,128	0,396 ± 0,023	0,78 ± 0,041	3,125 ± 0,016	21,54 ± 3,485	6,892 ± 0,054		RSD	AE	SD	2.25511	0.34989	0.792709	0.329865
	SD	1,96 ± 0,103	0,409 ± 0,025	0,77 ± 0,039	3,093 ± 0,02	19,299 ± 4,134	6,239 ± 0,081		1	AO	Control	2.66153	0.426196	0.825922	2.82135
P	Control	1,444 ± 0,073	0,374 ± 0,02	0,711 ± 0,037	2,979 ± 0,015	18,8 ± 2,639	6,311 ± 0,038		2	AO	Control	2.76639	0.476527	0.833152	3.17965
	MD	2,113 ± 0,134	0,263 ± 0,009	0,759 ± 0,039	3,419 ± 0,034	25,46 ± 6,09	7,447 ± 0,207		3	AO	Control	2.82182	0.394159	0.832276	3.30008
	SD	3,009 ± 0,152	0,213 ± 0,008	0,858 ± 0,046	3,799 ± 0,03	27,518 ± 8,876	7,244 ± 0,263		4	AO	Control	0.490432	0.0606002	0.0301482	2.79563
S1	Control	3,157 ± 0,16	0,389 ± 0,019	0,866 ± 0,045	2,81 ± 0,015	29,684 ± 7,522	10,565 ± 0,11		Mean	AO	Control	0.219328	0.0271012	0.0134827	3.02418
	MD	2,79 ± 0,202	0,441 ± 0,026	0,836 ± 0,043	2,978 ± 0,024	21,038 ± 3,587	7,064 ± 0,088		St.desv	AO	Control	2.29827	0.369993	0.795737	0.254079
	SD	2,591 ± 0,134	0,478 ± 0,024	0,825 ± 0,041	3,036 ± 0,023	21,966 ± 3,752	7,235 ± 0,085		RSD	AO	Control	2.49511	0.428968	0.81248	0.113628
S2	Control	2,742 ± 0,135	0,411 ± 0,021	0,833 ± 0,041	2,904 ± 0,006	22,118 ± 1,616	7,615 ± 0,009		1	AO	MD	2.52159	0.408513	0.847927	3.06815
	MD	2,053 ± 0,119	0,492 ± 0,019	0,817 ± 0,045	3,142 ± 0,013	22,125 ± 2,806	7,043 ± 0,036		4	AO	MD	2.7714	0.368244	0.832605	3.00608
	SD	2,319 ± 0,138	0,47 ± 0,023	0,808 ± 0,041	3,045 ± 0,016	22,343 ± 3,406	7,338 ± 0,054		5	AO	MD	2.52159	0.393929	0.822187	2.90087
									1	AO	MD	0.194058	0.02985	0.0228394	3.25302
									4	AO	MD	0.0867854	0.0133493	0.0102141	3.3097
									5	AO	MD	2.81754	0.535416	0.838345	3.04205
									1	AO	MD	2.51026	0.453158	0.816533	3.22171
									2	AO	MD	2.71582	0.410854	0.869169	3.2891
									4	AO	MD	2.81965	0.413203	0.838481	3.49616
									Mean	AO	MD	2.71582	0.453158	0.840632	3.17632
									St.desv	AO	MD	0.145355	0.0581733	0.0216409	0.185516
									RSD	AO	MD	0.0650048	0.0260159	0.00967808	0.0829654
									1	AO	SD	2.42706	0.437827	0.807505	3.22171
									2	AO	SD	2.89388	0.449003	0.766728	3.2891
									4	AO	SD	3.26013	0.435472	0.861344	3.49616
									1	AO	SD	2.99447	0.429005	0.84702	3.36895
									2	AO	SD	2.89388	0.437827	0.820649	2.98492
									5	AO	SD	0.347458	0.0083322	0.042551	3.56799
									2	AO	SD	0.155388	0.00372627	0.0190294	4.03777
									3	AO	SD	3.09048	0.451543	0.856851	3.2064
									6	AO	SD	3.97958	0.270662	0.894917	3.56785
									Mean	AO	SD	2.5528	0.438473	0.822353	3.41565
									St.desv	AO	SD	3.04437	0.420849	0.92412	0.301044
									RSD	AO	SD	2.55463	0.458948	0.839476	0.134631
									1	C	Control	2.81057	0.442453	0.8607	2.84788
									2	C	Control	3.00541	0.413821	0.866403	3.03824
									3	C	Control	0.529865	0.0713173	0.0372385	2.93983
									4	C	Control	0.236963	0.0318941	0.0166536	2.92648
									Mean	C	Control	2.04727	0.477716	0.79539	2.93811
									St.desv	C	Control	2.14862	0.473976	0.778455	0.078117
									RSD	C	Control	2.12704	0.470236	0.788055	0.034935
									5	C	MD	2.10764	0.473976	0.7873	3.66124
									C2	C	MD	0.0533895	0.00374	0.00849271	2.89112
									C3	C	MD	0.0238765	0.00167258	0.00379805	2.96347
									C3_rep	C	MD	2.86852	0.365849	0.847685	2.9179
									1	C	MD	2.81029	0.37576	0.844101	3.19588
									4	C	MD	2.85223	0.444628	0.846748	3.11761
									6	C	MD	2.94305	0.277158	0.852205	3.09686
									3	C	MD	2.86852	0.365849	0.847685	3.00959
									5_a	C	MD	0.0554097	0.0687276	0.00337409	3.38113
									5_b	C	MD	0.02478	0.0307359	0.00150894	2.99844
									Mean	C	MD	1.30482	0.383274	0.668799	3.12332
									St.desv	C	MD	1.45041	0.416894	0.791546	0.238518
									RSD	C	MD	1.30863	0.35498	0.664236	0.106668
									3	C	SD	1.61066	0.48882	0.709228	3.00959
									5_a	C	SD	1.60553	0.281996	0.737084	3.38113
									5_b	C	SD	1.28113	0.351859	0.68338	2.99844
									3	C	SD	1.59169	0.357977	0.733327	2.76334
									4	C	SD	1.45041	0.376543	0.712514	3.02708
									6	C	SD	0.152566	0.0640803	0.0454317	2.76161
									4	C	SD	0.0682296	0.0286576	0.0203177	2.87333
									5	C	SD	3.11365	0.396948	0.849333	3.29785
									6	C	SD	3.15974	0.390055	0.9134	3.21941
									Mean	C	SD	3.1079	0.340164	0.849017	3.03687
									St.desv	C	SD	3.25766	0.433053	0.856959	0.223495
									RSD	C	SD	3.15974	0.390055	0.867177	0.0999498
									1	CH	Control	0.0692827	0.0382337	0.0310331	3.22553
									2	CH	Control	0.0309842	0.0170986	0.0138784	2.95944
									3	CH	Control	2.59171	0.38839	0.822499	2.90014
									4	CH	Control	2.86407	0.436917	0.841065	2.91419
									Mean	CH	Control	2.78339	0.409864	0.835891	2.99983
									St.desv	CH	Control	2.74639	0.411724	0.833152	0.152581
									RSD	CH	Control	0.139902	0.0243169	0.00958134	0.0682365
									2	CH	MD	0.0625662	0.0108748	0.0042849	3.55027
									3	CH	MD	3.18273	0.392189	0.854331	3.01203
									4	CH	MD	2.15741	0.303253	0.779242	2.9894
									Mean	CH	MD	2.19056	0.44617	0.782547	3.1839
									St.desv	CH	MD	2.1876	0.44983	0.782256	0.317491
									RSD	CH	MD	1.94102	0.337529	0.755572	0.141986
									2	CH	SD	2.46985	0.424275	0.807563	3.55027
									3	CH	SD	1.99664	0.317639	0.762025	3.01203
									4	CH	SD	2.15143	0.323986	0.778637	2.9894
									1	CH	SD	3.03506	0.331533	0.846213	2.76408
									2	CH	SD	2.36803	0.3696	0.794265	3.26916
									3	CH	SD	0.446461	0.0585871	0.0349489	3.99547
									1	CH	SD	0.199663	0.026201	0.0156296	2.79749
									2	CH	SD	1.99664	0.317639	0.762025	3.64358
									3	CH	SD	2.15143	0.323986	0.778637	4.03983
									Mean	CH	SD	3.03506	0.331533	0.846213	3.34015
									St.desv	CH	SD	2.65177	0.267848	0.821518	0.489551
									RSD	CH	SD	3.16238	0.233605	0.853253	0.218934
									1	CJ	Control	3.33386	0.55154	0.861972
									2	CJ	Control	3.58136	0.349752	0.873211	3.48475
									3	CJ	Control	3.17635	0.422115	0.853995	3.05489
									4	CJ	Control	2.88611	0.349752	0.831353	3.05838
									5	CJ	Control	2.88611	0.349752	0.831353	2.92001
									Mean	CJ	Control	0.530617	0.0923175	0.0380538	3.12951
									St.desv	CJ	Control	0.237299	0.0412857	0.0170182	0.245437
									RSD	CJ	Control	3.48748	0.468659	0.870255	0.122718
									2	CJ	MD	2.20588	0.375491	0.785449	3.40809
									C5	CJ	MD	1.45207	0.429188	0.742255	2.73287
									C6	CJ	MD	3.19376	0.33714	0.856562	2.72822
									C6_rep	CJ	MD	2.35399	0.462474	0.675257	2.85605
									1	CJ	MD	1.88484	0.382754	0.798266	2.82398
									5	CJ	MD	2.35713	0.509178	0.799409	3.08936
									6	CJ	MD	1.89675	0.33688	0.793857	2.70323
									5C	CJ	MD	2.35399	0.430781	0.699755	3.15687
									6C	CJ	MD	2.35399	0.414727	0.780118	2.77887
									6C_rep	CJ	MD	0.637826	0.0604339	0.0649756	2.68363
									2	CJ	MD	0.285244	0.0270269	0.029058	3.38735
									4	CJ	MD	2.35713	0.509178	0.799409	2.67675
									Mean	CJ	MD	1.89675	0.33688	0.793857	2.91877
									St.desv	CJ	MD	1.34359	0.430781	0.699755	0.271105
									RSD	CJ	MD	1.85171	0.438461	0.777514	0.121242
									2	CJ	SD	1.50826	0.467428	0.737477	3.38735
									4	CJ	SD	2.58248	0.365153	0.852032	2.67675
									1	CJ	SD	1.647	0.312572	0.636753	3.62237
									2	CJ	SD	1.62676	0.62651	0.814112	3.3235
									5	CJ	SD	1.85171	0.459183	0.886717	3.88724
									Mean	CJ	SD	1.85171	0.438461	0.777514	3.37944
									St.desv	CJ	SD	0.396888	0.0956762	0.0766708	0.451066
									RSD	CJ	SD	0.177494	0.0427877	0.0342882	0.201723
									1	E	Control	0.969455	0.212166	0.573271	2.80579
									2	E	Control	2.32554	0.31366	0.793425	2.88116
									3	E	Control	2.42971	0.361759	0.80247	2.96373
									4	E	Control	2.27618	0.322243	0.788911	2.85321
									Mean	E	Control	1.05526	0.294274	0.637845	2.87598
									St.desv	E	Control	1.62456	0.348814	0.876633	0.0662628
									RSD	E	Control	0.957385	0.292091	0.606307	0.0296336
									1	E	MD	2.09517	0.427953	0.804373	3.1817
									2	E	MD	1.19012	0.28702	0.629749	2.8361
									3	E	MD	1.32226	0.295837	0.696519	2.97533
									4	E	MD	1.62456	0.315582	0.72095	2.66963
									5	E	MD	0.602241	0.0565866	0.104609	2.9402
									6	E	MD	0.26933	0.0253063	0.0467824	2.73083
									1	E	MD	2.09517	0.427953	0.804373
									3	E	MD	1.19012	0.28702	0.629749	3.45859
									4	E	MD	1.32226	0.295837	0.696519	3.36438
									Mean	E	MD	2.08913	0.565493	0.911271	3.01959
									St.desv	E	MD	2.23047	0.324596	0.784563	0.289254
									RSD	E	MD	2.67809	0.457012	0.821692	0.144627
									1	E	SD	2.08913	0.377407	0.782634	3.31427
									3	E	SD	3.03987	0.318174	0.844868	3.29779
									4	E	SD	2.06797	0.343175	0.76804	3.91491
									4	E	SD	2.08913	0.377407	0.782634	2.78086
									6	E	SD	0.577448	0.0912149	0.0817198	3.86868
									Mean	E	SD	0.258242	0.0407925	0.0365462	3.4353
									St.desv	E	SD	2.22222	0.379198	0.755234	0.468959
									RSD	E	SD	1.05641	0.470005	0.688208	0.209725
									1	F	Control	2.49914	0.37281	0.822259	3.22716
									2	F	Control	1.92592	0.407338	0.755234	3.59461
									4	F	Control	0.765647	0.0543654	0.0670252	3.11259
									5	F	Control	0.342408	0.024313	0.0299746	2.85007
									Mean	F	Control	0.549338	0.379198	0.479976	3.19611
									St.desv	F	Control	1.05641	0.417853	0.688208	0.309024
									RSD	F	Control	1.18589	0.37281	0.822259	0.1382
									4	F	MD	0.624832	0.653558	0.576911	2.82696
									5	F	MD	0.478966	0.354608	0.421696	2.82596
									6	F	MD	1.57628	0.335355	0.853794	3.02527
									2	F	MD	1.53478	0.417853	0.8147	3.08894
									4	F	MD	1.70839	0.434493	0.739163	2.84173
									5	F	MD	1.95815	0.394951	0.791909	2.81534
									2	F	MD	1.18589	0.417853	0.687624	3.49234
									5	F	MD	0.545436	0.0939994	0.15871	2.65201
									6	F	MD	0.243927	0.0420378	0.0709775	3.03201
									Mean	F	MD	2.9238	0.429151	0.843157	2.95562
									St.desv	F	MD	2.3345	0.410813	0.799935	0.243598
									RSD	F	MD	2.58399	0.48425	0.820256	0.10894
									2	F	SD	2.7425	0.581935	0.831547	3.49234
									5	F	SD	2.05625	0.552581	0.772703	2.65201
									6	F	SD	2.40726	0.519495	0.809213	3.03201
									4	F	SD	2.72131	0.425127	0.830102	3.26837
									5	F	SD	2.34736	0.528932	0.801069	2.81545
									6	F	SD	2.11695	0.583724	0.779119
									2	F	SD	2.44126	0.598488	0.809049	3.10444
									5	F	SD	2.53299	0.439198	0.847259	2.93424
									6	F	SD	1.67898	0.680246	0.767145	2.87692
									Mean	F	SD	2.40726	0.519495	0.809213	3.02197
									St.desv	F	SD	0.340159	0.0841305	0.0266588	0.266489
									RSD	F	SD	0.152124	0.0376243	0.0119222	0.133245
									1	H	Control	2.53299	0.439198	0.847259	3.16623
									2	H	Control	1.67898	0.364621	0.767145	2.89798
									3	H	Control	2.05292	0.214898	0.892597	3.16083
									4	H	Control	2.59564	0.445389	0.821121	3.00288
									Mean	H	Control	1.40406	0.358998	0.728034	3.05698
									St.desv	H	Control	2.05292	0.364621	0.811231	0.130295
									RSD	H	Control	0.521023	0.0929165	0.0649645	0.0582695
									4	H	MD	0.233009	0.0415535	0.029053	3.29369
									5	H	MD	3.06424	0.47567	0.846985	2.85714
									6	H	MD	2.28939	0.354882	0.794926	2.96472
									2	H	MD	3.07199	0.436314	0.850924	3.28884
									5	H	MD	3.61346	0.463571	0.876943	3.75034
									6	H	MD	2.73636	0.606349	0.830244	3.02793
									Mean	H	MD	2.85253	0.501853	0.83788	3.19711
									St.desv	H	MD	3.66008	0.404319	0.87885	0.323112
									RSD	H	MD	3.06424	0.466751	0.846985	0.1445
									2	H	SD	3.22589	0.491049	0.859126	3.28884
									5	H	SD	3.06424	0.466751	0.846985	3.75034
									6	H	SD	0.423611	0.0695867	0.0253701	3.02793
									2	H	SD	0.189445	0.0311201	0.0113458	3.91739
									4	H	SD	3.66008	0.412099	0.87885	3.05313
									Mean	H	SD	#REF!	0.448751	0.863557	3.40753
									St.desv	H	SD	3.22589	0.491049	0.859126	0.406589
									RSD	H	SD	3.87336	0.50802	0.977612	0.181832
									1	K	Control	#REF!	0.383838	0.73864	3.0632
									2	K	Control	#REF!	0.448751	0.863557	4.41897
									4	K	Control	#REF!	0.0521034	0.0849504	3.1984
									5	K	Control	#REF!	0.0233014	0.037991	4.14645
									curva_1a	K	Control	2.16448	0.384073	0.785992	3.24192
									curva_1b	K	Control	2.65421	0.438923	0.827286	2.94179
									Mean	K	Control	1.65606	0.367379	0.72411	3.50179
									St.desv	K	Control	2.66769	0.362807	0.828243	0.620056
									RSD	K	Control	2.26971	0.355591	0.796079	0.277298
									3	K	MD	2.08127	0.354272	0.777451	2.8449
									5	K	MD	2.33933	0.376678	0.802352	3.14982
									6	K	MD	1.80584	0.320543	0.744999	3.38494
									Mean	K	MD	1.77488	0.22818	0.63258	3.12655
									St.desv	K	MD	2.15705	0.354272	0.768788	0.270771
									RSD	K	MD	0.367428	0.056832	0.0615567	0.121092
									3	K	SD	0.164319	0.025416	0.027529	2.8449
									5	K	SD	2.33933	0.376678	0.802352	3.14982
									6	K	SD	1.80584	0.645815	0.744999	3.38494
									4	K	SD	1.82339	0.359252	0.639672	3.13484
									5	K	SD	2.42914	0.430572	0.810008	2.90927
									6	K	SD	2.27231	0.454836	0.796319	3.11074
									Mean	K	SD	2.29285	0.433606	0.798198	3.08908
									St.desv	K	SD	2.38888	0.405645	0.806634	0.192739
									RSD	K	SD	2.31734	0.362448	0.800403	0.0861956
									1	M	Control	1.97097	0.397565	0.693801	2.66139
									2	M	Control	2.18223	0.429602	0.765821	3.06561
									4	M	Control	0.245467	0.0875086	0.0608902	2.68558
									Mean	M	Control	0.109776	0.039135	0.0272309	2.80419
									St.desv	M	Control	1.52429	0.316296	0.700787	0.226716
									RSD	M	Control	2.4027	0.409626	0.805462	0.10139
									1	M	MD	2.84236	0.381354	0.837758	2.92223
									2	M	MD	2.73584	0.541261	0.830744	3.14068
									3	M	MD	2.68531	0.436673	0.82725	2.9726
									1	M	MD	2.28136	0.534828	0.794765	2.77113
									4	M	MD	2.41198	0.436673	0.799461	3.13198
									5	M	MD	0.483729	0.0881539	0.0510138	3.08914
									3	M	MD	0.21633	0.0394236	0.0228141	3.36684
									4	M	MD	2.73584	0.541261	0.830744	3.31119
									6	M	MD	2.68531	0.333322	0.82725	3.59926
									Mean	M	MD	2.28136	0.534828	0.794765	3.14501
									St.desv	M	MD	2.86231	0.302132	0.839022	0.2514
									RSD	M	MD	2.38985	0.29693	0.804371	0.0799362
									3	M	SD	2.59093	0.401695	0.81923	3.36684
									4	M	SD	0.244855	0.125266	0.0187609	3.31119
									6	M	SD	0.109503	0.0560208	0.00839011	3.59926
									2	M	SD	2.87937	0.414358	0.844663	3.10878
									4	M	SD	1.38083	0.559785	0.762775	3.72484
									5	M	SD	2.11371	0.391675	0.813406	3.08216
									1	M	SD	2.12464	0.455272	0.806948	3.35975
									3	M	SD	0.749334	0.091218	0.0413244	3.00348
									4	M	SD	0.335112	0.040794	0.0184808	3.29009
									Mean	M	SD	2.87937	0.414358	0.844663	3.31626
									St.desv	M	SD	1.38083	0.559785	0.762775	0.236607
									RSD	M	SD	2.11371	0.391675	0.813406	0.0713476
									1	MS	Control	1.56221	0.483072	0.779163	2.84184
									2	MS	Control	2.47094	0.508445	0.871929	3.69146
									3	MS	Control	1.36083	0.285345	0.703801	3.15916
									4	MS	Control	1.96132	0.440447	0.795956	3.54867
									Mean	MS	Control	0.629701	0.0977733	0.060538	3.31028
									St.desv	MS	Control	0.281611	0.0437255	0.0270734	0.384878
									RSD	MS	Control	0.687059	0.34775	0.516718	0.172123
									1	MS	MD	0.0162518	0.321493	0.0211695	3.25813
									2	MS	MD	1.25776	0.279942	0.646735	3.05617
									3	MS	MD	1.30366	0.565102	0.695152	3.09826
									1	MS	MD	0.0302785	0.230415	0.0385701	3.30809
									2	MS	MD	1.1931	0.314763	0.632496	3.00115
									3	MS	MD	0.844653	0.389804	0.509948	3.32011
									1	MS	MD	1.01676	0.349211	0.650646	3.12108
									2	MS	MD	0.638059	0.330602	0.507226	3.15912
									3	MS	MD	0.776398	0.347676	0.46874	2.86469
									Mean	MS	MD	0.488291	0.093173	0.258287	3.13187
									St.desv	MS	MD	0.628918	0.267988	0.551024	0.149425
									RSD	MS	MD	2.65417	0.389804	0.821787	0.047711
									1	MS	SD	1.01676	0.349211	0.650646	3.12108
									2	MS	SD	0.638059	0.330602	0.507226	3.15912
									3	MS	SD	1.74169	0.488406	0.757167	2.86469
									1	MS	SD	1.86366	0.223664	0.653651	3.02877
									2	MS	SD	3.21946	0.467054	0.856335	3.17295
									3	MS	SD	2.81831	0.454338	0.833049	3.45283
									1	MS	SD	3.23857	0.352349	0.857312	3.28754
									2	MS	SD	0.909775	0.405895	0.557596	2.88195
									3	MS	SD	2.01116	0.384591	0.721641	2.96468
									Mean	MS	SD	1.01323	0.082179	0.133604	3.10373
									St.desv	MS	SD	0.503805	0.213679	0.185139	0.192061
									RSD	MS	SD	2.85389	0.412402	0.846851	0.0618805
									1	P	Control	2.13026	0.358559	0.789584	2.87749
									3	P	Control	2.30622	0.336596	0.806245	3.12659
									4	P	Control	1.91767	0.316368	0.766291	3.01378
									1_NEW	P	Control	2.10965	0.353446	0.787487	2.85265
									2_NEW	P	Control	1.93185	0.545703	0.767967	3.18556
									3_NEW	P	Control	1.74421	0.402251	0.744156	2.96095
									4_NEW	P	Control	1.90657	0.468975	0.764966	2.86927
									Mean	P	Control	1.84714	0.397414	0.757666	2.98376
									St.desv	P	Control	2.08305	0.39908	0.781246	0.131743
									RSD	P	Control	0.335181	0.0716275	0.0308912	0.0589174
									4	P	MD	0.160908	0.179482	0.0395409	3.41925
									5	P	MD	1.74421	0.402251	0.744156	2.90229
									6	P	MD	1.90657	0.468975	0.764966	3.21514
									1	P	MD	1.84714	0.615445	0.757666	4.06773
									2	P	MD	1.74937	0.356303	0.744861	3.41876
									4	P	MD	2.31509	0.404615	0.80703	3.72251
									Mean	P	MD	2.14542	0.488982	0.791105	3.45761
									St.desv	P	MD	1.80206	0.295001	0.75189	0.40313
									RSD	P	MD	2.03437	0.325334	0.779546	0.116592
									1	P	SD	2.17504	0.361143	0.794029	4.06773
									2	P	SD	1.96881	0.413117	0.770583
									4	P	SD	0.207067	0.0984814	0.0231501	3.72251
									3	P	SD	0.105174	0.238386	0.0300424	3.50272
									5	P	SD	1.25801	0.252757	0.653697	4.36846
									6	P	SD	2.63933	0.368861	0.826643	3.81548
									1	P	SD	1.72316	0.351464	0.734274	3.18257
									4	P	SD	3.44597	0.301878	0.87248	4.20975
									6	P	SD	2.14591	0.0635775	0.762545
									Mean	P	SD	1.66307	0.264822	0.725633	3.83846
									St.desv	P	SD	2.14591	0.267227	0.762545	0.413967
									RSD	P	SD	0.791686	0.109831	0.0777223	0.107847
									1	S1	Control	0.368928	0.411004	0.101925	2.65047
									2	S1	Control	3.44597	0.301878	0.87248	2.87153
									4	S1	Control	4.26953	0.0635775	0.9025	2.89841
									5	S1	Control	1.66307	0.264822	0.725633	2.83236
									Mean	S1	Control	3.30979	0.235709	0.93787	2.81319
									St.desv	S1	Control	2.61705	0.250485	0.825029	0.111821
									RSD	S1	Control	2.56609	0.307903	0.821251	0.0500078
									4	S1	MD	3.6774	0.261889	1.04204	2.74252
									5	S1	MD	2.74229	0.195294	0.777061	3.03592
									6	S1	MD	3.08981	0.0683994	0.85488	2.96205
									2	S1	MD	3.04233	0.216662	0.862082	3.34621
									3	S1	MD	0.753831	0.0917413	0.0927414	2.8111
									5	S1	MD	0.247781	0.42343	0.107578	2.7058
									2	S1	MD	2.26219	0.367335	0.787962	3.27032
									4	S1	MD	2.57682	0.470368	0.922646	3.0608
									6	S1	MD	3.50552	0.403795	0.89231	2.99744
									Mean	S1	MD	4.88803	0.412125	0.913483	2.99246
									St.desv	S1	MD	1.99167	0.404094	0.809972	0.220055
									RSD	S1	MD	2.86313	0.509645	0.763722	0.0735364
									2	S1	SD	2.99974	0.45261	0.869287	3.27032
									4	S1	SD	1.91701	0.60128	0.786194	3.0608
									6	S1	SD	2.47778	0.374787	0.806783	2.99744
									3	S1	SD	2.83132	0.444004	0.839151	2.85243
									4	S1	SD	0.919826	0.0747567	0.0604609	3.31248
									5	S1	SD	0.324875	0.168369	0.0720501	2.80385
									2	S1	SD	2.99974	0.45261	0.869287	3.00228
									4	S1	SD	1.91701	0.60128	0.786194	3.33586
									6	S1	SD	2.47778	0.374787	0.806783	2.80637
									Mean	S1	SD	2.43193	0.63157	0.83279	3.04909
									St.desv	S1	SD	1.95014	0.290106	0.791098	0.213098
									RSD	S1	SD	2.06479	0.593587	0.768065	0.0698889
									1	S2	Control	3.44182	0.508594	0.890602	2.93357
									2	S2	Control	3.24402	0.436943	0.856264	2.92999
									4	S2	Control	3.02139	0.454502	0.844121	2.85113
									Mean	S2	Control	2.61651	0.482664	0.827245	2.9049
									St.desv	S2	Control	0.578442	0.112762	0.0416113	0.0465949
									RSD	S2	Control	0.221074	0.233624	0.0503011	0.0208379
									1	S2	MD	2.06957	0.499301	0.931196	3.07985
									3	S2	MD	1.90257	0.528311	0.780401	3.36327
									5	S2	MD	1.91965	0.285057	0.81881	2.9897
									2	S2	MD	1.94465	0.538229	0.800775	3.19456
									6	S2	MD	2.60228	0.539199	0.823281	3.07658
									1	S2	MD	1.65785	0.457237	0.782649	3.02935
									2	S2	MD	2.72291	0.523251	0.83184	3.29186
									6	S2	MD	1.73704	0.594326	0.781527	3.14436
									Mean	S2	MD	2.06957	0.495614	0.81881	3.14619
									St.desv	S2	MD	0.388531	0.0934369	0.0497402	0.129876
									RSD	S2	MD	0.187735	0.188528	0.060747	0.0412804
									1	S2	SD	1.65785	0.457237	0.782649	3.02935
									2	S2	SD	2.72291	0.523251	0.83184	3.29186
									6	S2	SD	1.73704	0.594326	0.781527	3.14436
									1	S2	SD	2.04392	0.494021	0.799801	3.16245
									2	S2	SD	3.64921	0.447818	0.880541	3.15877
									4	S2	SD	1.53263	0.365194	0.741423	2.86099
									1	S2	SD	2.56571	0.339436	0.820553	2.8631
									3	S2	SD	2.75626	0.509256	0.834093	2.9888
									4	S2	SD	2.47638	0.532098	0.813604	2.96224
									Mean	S2	SD	2.3491	0.473626	0.809559	3.05132
									St.desv	S2	SD	0.677414	0.081267	0.0395628	0.147644
									RSD	S2	SD	0.288372	0.171585	0.0488695	0.048387

## Sheet: Figure 1_Curves A_I
																												A, µmol CO2 m⁻² s⁻1
	Fit curves																														Experiemental data curves
			2000	1500	1250	1000	750	500	350	250	200	125	100	50	0.0100008																		2000	1500	1250	1000	750	500	350	250	200	125	100	50	0.0100008
	Fit_C	Arbequina	10.4462	10.4459	10.4444	10.4354	10.38	10.0301	9.19175	7.87124	6.80401	4.50189	3.52987	1.31116	-1.14209																Experimental_C	Arbequina	10.2706	10.3718	10.5399	10.3564	10.0565	9.1151	8.34877	#N/A	6.52351	#N/A	3.89028	1.44325	-1.48286
		Arbosana	8.35859	8.35513	8.34549	8.31066	8.18219	7.68788	6.82486	5.67787	4.82642	3.1065	2.41137	0.866905	-0.804632																	Arbosana	8.37896	8.66001	8.68819	8.42608	7.93757	7.15884	6.36354	#N/A	5.03027	#N/A	3.0047	1.16024	-1.44351
		Cornicabra	10.9982	10.9965	10.9904	10.9632	10.838	10.2509	9.1264	7.61439	6.50823	4.32353	3.45614	1.55063	-0.493411																	Cornicabra	10.4099	11.4519	11.4907	11.1127	10.5465	9.66572	8.65479	#N/A	6.77481	#N/A	3.94022	1.65558	-0.91045
		Chemlali	14.8611	14.8605	14.8571	14.837	14.718	14.0252	12.5325	10.434	8.88614	5.84656	4.65038	2.04197	-0.737967																	Chemlali	14.3836	15.1754	15.2842	14.797	14.3963	13.1842	12.1461	#N/A	9.26076	#N/A	5.0443	2.18498	-1.15315
		Cornezuelo de Jaén	3.74232	3.73914	3.73244	3.71354	3.66129	3.52261	3.33884	3.08895	2.85828	2.18252	1.80423	0.714446	-0.76657																	Cornezuelo de Jaén	3.83602	3.95506	3.99742	3.73497	3.54787	3.25967	2.96207	#N/A	2.57539	#N/A	1.88476	1.05833	-1.12597
		Empeltre	12.9686	12.9683	12.9665	12.955	12.8812	12.4068	11.2892	9.59846	8.2881	5.60015	4.5103	2.09116	-0.522658																	Empeltre	12.4432	13.4605	13.3069	13.1245	12.6029	11.7704	10.7147	#N/A	8.56266	#N/A	4.93016	2.21016	-0.885323
		Frantoio	1.9284	1.92806	1.92684	1.92145	1.89787	1.79841	1.63174	1.43202	1.29181	0.979208	0.81228	0.202947	-1.22513																	Frantoio	2.75838	2.2924	2.15052	2.00421	1.75303	1.55463	1.40759	#N/A	1.14509	#N/A	0.82462	0.336329	-1.34339
		Hojiblanca	11.4483	11.4437	11.4288	11.368	11.1221	10.1601	8.63439	6.89138	5.74996	3.70162	2.94005	1.32987	-0.347099																	Hojiblanca	11.7143	11.8434	11.4867	11.0624	10.2317	9.26826	8.01434	#N/A	6.3988	#N/A	3.57075	1.44994	-1.09466
		Koroneiki	7.29509	7.27348	7.23685	7.14744	6.92449	6.34295	5.56313	4.65084	3.99911	2.67457	2.12632	0.877186	-0.507565																	Koroneiki	6.90004	7.88374	7.79757	7.14008	6.72183	5.42894	5.33964	#N/A	3.87416	#N/A	2.68458	1.16607	-1.09903
		Martina	2.22471	2.22471	2.22471	2.22471	2.2247	2.22408	2.21682	2.17926	2.11291	1.7853	1.53554	0.623319	-0.888409																	Martina	1.07426	1.44749	2.06128	2.0762	2.25175	2.35742	2.33673	#N/A	2.17441	#N/A	1.49423	0.630529	-0.88459
		Manzanilla de Sevilla	2.21201	2.21201	2.21201	2.21201	2.21198	2.2104	2.19414	2.12264	2.01258	1.56038	1.25746	0.254412	-1.31072																	Manzanilla de Sevilla	2.42289	2.35579	2.29391	2.33297	2.32442	2.2437	1.96143	#N/A	1.61363	#N/A	1.23339	0.520154	-1.4413
		Picual	11.9662	11.9657	11.9634	11.9503	11.875	11.4385	10.4695	9.02143	7.87755	5.41448	4.36249	1.92267	-0.820688																	Picual	11.9877	12.8392	13.9718	12.6802	13.0369	11.5022	10.9856	#N/A	8.05957	#N/A	4.54017	2.03155	-0.959013
		Sikitita 1	7.91612	7.91603	7.91546	7.91141	7.88161	7.65744	7.05792	6.06251	5.24576	3.48983	2.75605	1.09887	-0.715128																	Sikitita 1	7.49034	8.23992	8.30494	8.24382	7.89007	7.24756	6.76341	#N/A	5.41642	#N/A	3.0773	1.16433	-0.927587
		Sikitita 2	12.0071	12.0066	12.0039	11.9883	11.8956	11.3511	10.1615	8.46566	7.20198	4.69768	3.70592	1.53517	-0.784986																	Sikitita 2	12.16	12.541	12.3526	11.981	11.5106	10.6845	9.75497	#N/A	7.57626	#N/A	3.96023	1.6096	-1.05853
	Fit_C_Desv.St	AE	2.39161	2.39132	2.38991	2.38164	2.33361	2.07176	1.58217	1.04328	0.75309	0.409235	0.326202	0.186736	0.204907																Experimental_C_Desv.St	AE	1.51598	1.62673	1.73499	1.83091	1.721	1.628	1.30627	#N/A	0.811334	#N/A	0.322922	0.122253	0.186607
		AO	2.69096	2.68608	2.67271	2.6264	2.47393	2.05076	1.64715	1.36869	1.20435	0.837781	0.672992	0.348543	0.483467																	AO	2.3514	2.26111	2.16987	2.0026	1.81781	1.63333	1.49361	#N/A	1.1462	#N/A	0.489251	0.16154	0.0596803
		C	2.83488	2.83332	2.82787	2.80452	2.70674	2.33638	1.82474	1.3626	1.12677	0.820359	0.744609	0.666899	0.708635																	C	2.72997	2.48315	2.27992	2.14839	2.15523	1.8796	1.60327	#N/A	1.12361	#N/A	0.61604	0.394664	0.554341
		CH	1.03865	1.03876	1.03915	1.04068	1.04562	1.05316	1.0336	0.958659	0.87713	0.671462	0.579395	0.371949	0.1978																	CH	1.21483	0.696286	0.890327	1.10646	1.10931	1.00912	1.00256	#N/A	0.630071	#N/A	0.193629	0.305211	0.300606
		CJ	1.35666	1.3596	1.36583	1.3836	1.43392	1.56807	1.70488	1.7607	1.72251	1.44664	1.25828	0.687544	0.325678																	CJ	1.34288	1.49688	1.46411	1.31061	1.45729	1.39545	1.45026	#N/A	1.31881	#N/A	0.907975	0.506462	0.267739
		E	2.62586	2.62566	2.62457	2.61786	2.5779	2.36164	1.96204	1.50509	1.22504	0.768454	0.610757	0.28928	0.0386589																	E	2.21796	2.26983	2.14382	2.15033	1.99268	1.78369	1.63438	#N/A	1.10943	#N/A	0.472819	0.238122	0.0772733
		F	0.886404	0.885924	0.884195	0.876572	0.843233	0.702652	0.46772	0.193677	0.0396269	0.294957	0.392486	0.539684	0.488801																	F	0.859615	0.874448	0.864354	0.810534	0.690229	0.602763	0.424802	#N/A	0.292919	#N/A	0.318266	0.443646	0.449935
		H	1.75009	1.74738	1.73961	1.71211	1.6197	1.34459	1.02449	0.754636	0.61754	0.43842	0.393957	0.34368	0.354941																	H	1.88452	1.46083	1.4251	1.2438	1.19427	1.05149	0.876253	#N/A	0.722663	#N/A	0.615698	0.264931	0.137646
		K	1.94658	1.96292	1.99166	2.06162	2.21867	2.47854	2.56325	2.43241	2.23998	1.6664	1.37634	0.688383	0.651253																	K	1.90567	1.92373	1.88663	1.6964	1.90884	1.49169	1.96955	#N/A	1.60037	#N/A	1.18203	0.617942	0.425795
		M	1.15246	1.15246	1.15246	1.15246	1.15247	1.15328	1.1611	1.18885	1.21823	1.23495	1.18043	0.774349	0.16572																	M	0.662495	0.451832	0.743243	0.770332	0.846837	0.825489	0.911736	#N/A	0.840456	#N/A	0.823554	0.575705	0.1295
		MS	0.963701	0.963701	0.963701	0.963701	0.963691	0.96293	0.953562	0.910173	0.846095	0.632352	0.526612	0.286392	0.25745																	MS	0.719201	0.766359	0.729834	0.849367	0.925587	0.810857	0.669524	#N/A	0.549019	#N/A	0.466152	0.288704	0.142836
		P	3.60952	3.60896	3.60649	3.59335	3.52327	3.15912	2.46363	1.63394	1.13767	0.489301	0.355104	0.250294	0.360513																	P	2.89699	3.25244	2.28898	2.93106	2.1086	2.26391	1.53271	#N/A	1.18938	#N/A	0.462209	0.280228	0.20606
		S1	1.63641	1.63651	1.63707	1.64031	1.65752	1.72568	1.77567	1.69846	1.55518	1.10597	0.880633	0.323045	0.327265																	S1	1.41247	1.28369	1.31489	1.28659	1.34895	1.28274	1.17962	#N/A	1.0033	#N/A	0.633743	0.218341	0.203169
		S2	2.41281	2.41226	2.40988	2.39777	2.3391	2.0841	1.68879	1.29428	1.07686	0.767582	0.676041	0.513679	0.37066																	S2	1.60223	1.78872	1.72998	1.58451	1.55777	1.52493	1.39464	#N/A	0.817912	#N/A	0.397073	0.215115	0.385055
			2000	1500	1250	1000	750	500	350	250	200	125	100	50	0.0100008																		2000	1500	1250	1000	750	500	350	250	200	125	100	50	0.0100008
	Fit_MD	Arbequina	4.12001	4.12001	4.12	4.11992	4.11887	4.10421	4.03686	3.85319	3.63326	2.89429	2.45275	1.08907	-1.09265																Experimental_MD	Arbequina	3.29482	3.56519	3.75516	3.88525	3.86481	3.8696	#N/A	3.61379	#N/A	2.94471	#N/A	1.20158	-0.955594
		Arbosana	4.12092	4.12084	4.12045	4.11835	4.10639	4.03598	3.87102	3.59711	3.34908	2.66421	2.27808	1.05432	-0.894261																	Arbosana	3.41698	3.51097	3.90787	3.787	3.9399	3.72666	3.07493	3.69638	2.87046	2.8775	2.19216	1.11005	-1.03771
		Cornicabra	6.52305	6.52304	6.52296	6.52237	6.51737	6.47011	6.30131	5.91799	5.50915	4.30653	3.65642	1.84479	-0.576507																	Cornicabra	5.88335	6.34013	6.60632	6.87949	6.89132	6.79403	#N/A	5.94718	#N/A	4.24672	#N/A	1.7334	-0.544464
		Chemlali	0.882889	0.88289	0.88288	0.882805	0.882237	0.877996	0.86682	0.847078	0.827583	0.756208	0.700823	0.434859	-0.621243																	Chemlali	0.893267	0.870742	0.822282	0.901395	0.910207	0.87046	0.375347	0.929794	0.443827	0.842861	0.324409	0.413962	-0.632292
		Cornezuelo de Jaén	1.0743	1.0743	1.0743	1.0743	1.0743	1.07426	1.07361	1.02023	1.0601	0.996413	0.926537	0.564122	-0.773488																	Cornezuelo de Jaén	0.822464	0.841924	0.875325	0.927787	0.957998	0.991446	#N/A	1.01095	#N/A	0.958609	#N/A	0.478082	-0.817289
		Empeltre	1.9981	1.9981	1.99809	1.99807	1.99771	1.9917	1.96251	1.88098	1.77998	1.42125	1.19581	0.483053	-1.19959																	Empeltre	1.51479	1.56301	1.78968	2.06643	2.25671	2.32981	#N/A	2.3025	#N/A	1.68119	#N/A	0.2156	-1.27239
		Frantoio	5.25828	5.13142	5.02233	4.86942	4.66376	4.39027	4.19933	3.98653	3.79155	3.16445	2.78132	1.58537	-0.161656																	Frantoio	5.35092	5.10948	4.90087	5.02207	4.70092	4.54013	#N/A	4.23367	#N/A	3.42716	#N/A	1.71415	-0.697157
		Hojiblanca	2.47031	2.47031	2.47031	2.47031	2.47031	2.47025	2.46869	2.45523	2.42363	2.20655	2.02225	1.18297	-0.769066																	Hojiblanca	1.80009	2.027	2.14086	2.17669	2.29864	2.29589	#N/A	2.27872	#N/A	1.99506	#N/A	1.06967	-0.608696
		Koroneiki	6.65228	6.65198	6.65113	6.64692	6.62652	6.51536	6.23183	5.71586	5.22853	3.92243	3.26802	1.55306	-0.594277																	Koroneiki	6.01758	6.42359	6.68604	6.74308	6.66729	6.45894	7.18041	4.84479	6.16999	3.78286	3.93318	1.55945	-0.918037
		Martina	9.64271	9.6424	9.64088	9.63251	9.6401	9.47277	8.60752	7.47793	6.56301	4.56681	3.65558	1.73278	-0.485283																	Martina	8.88675	10.0846	10.1717	9.91129	9.53458	8.88547	10.2363	5.96751	8.08838	4.09556	4.79723	1.88568	-0.747434
		Manzanilla de Sevilla	2.53548	2.53548	2.53548	2.53548	2.53544	2.53367	2.51673	2.44493	2.33196	1.84468	1.51183	0.372703	-1.73413																	Manzanilla de Sevilla	2.18087	2.3689	2.52559	2.63357	2.72479	2.69417	#N/A	2.469	#N/A	1.97126	#N/A	0.351141	-1.92649
		Picual	4.57644	4.50338	4.42935	4.31262	4.13334	3.84864	3.55417	3.20812	2.9397	2.31188	1.8935	1.10631	-0.563167																	Picual	1.93284	3.09999	3.29824	3.80823	3.95403	3.65553	#N/A	3.27285	#N/A	2.31941	#N/A	1.04791	-0.903404
		Sikitita 1	4.03858	4.03858	4.03858	4.03856	4.03827	4.03296	4.00225	3.89814	3.75043	3.15417	2.75199	1.42007	-0.61846																	Sikitita 1	3.29777	3.46341	3.74531	3.78049	3.84768	3.9337	4.291	3.39053	4.11597	2.8114	2.90802	1.35697	-0.764088
		Sikitita 2	3.87623	3.87623	3.87623	3.87623	3.8762	3.88024	3.86198	3.77287	3.62044	2.99011	2.55966	1.18581	-0.808301																	Sikitita 2	3.76457	3.93768	4.02275	4.00068	3.95803	3.89563	2.21682	3.74122	2.07449	3.08851	1.73838	1.32208	-0.874748
	Fit_MD_Desv.St	AE	0.999262	0.999262	0.999262	0.999262	0.999262	0.999251	0.998767	0.993004	0.973148	0.855375	0.737106	0.213125	-0.79289																Experimental_MD_Desv.St	AE	1.5566	1.54065	1.64767	1.71478	1.80761	1.7787	#N/A	1.85756	#N/A	1.62344	#N/A	1.03948	0.729507
		AO	1.61279	1.61273	1.61245	1.61067	1.59937	1.52832	1.3742	1.17724	1.05319	0.865004	0.807953	0.684756	0.729724																	AO	1.57307	1.50717	1.86824	1.73023	1.7615	1.7409	0.558796	1.7274	0.488244	1.43965	0.430321	0.472843	0.756414
		C	1.9192	1.91919	1.91914	1.91869	1.91484	1.87955	1.76744	1.55986	1.38139	0.996629	0.845109	0.595859	0.67968																	C	1.97387	2.02705	2.08915	2.02375	1.90936	1.77367	#N/A	1.51814	#N/A	0.934122	#N/A	0.640043	0.544348
		CH	0.487661	0.487661	0.487663	0.487676	0.487777	0.488642	0.49147	0.495274	0.493734	0.450907	0.405282	0.232837	0.207844																	CH	0.40021	0.42219	0.523063	0.479618	0.505304	0.503092	0.0557812	0.537195	0.0508984	0.555841	0.0422761	0.325066	0.195788
		CJ	0.490468	0.490468	0.490468	0.490468	0.490468	0.490496	0.490978	0.551152	0.50009	0.52567	0.534566	0.544173	0.345457																	CJ	0.478639	0.517535	0.491856	0.450195	0.523905	0.562219	#N/A	0.577039	#N/A	0.511933	#N/A	0.505851	0.266324
		E	2.11479	2.11479	2.11479	2.11476	2.11423	2.10562	2.06522	1.96022	1.83811	1.42008	1.15702	0.376768	0.526419																	E	1.45197	1.44243	1.53159	1.586	1.78123	1.84038	#N/A	1.80841	#N/A	1.31612	#N/A	0.532431	0.654672
		F	0.966762	0.739311	0.561984	0.390726	0.477597	0.917953	1.2227	1.40367	1.43666	1.28049	1.12674	0.556643	0.500126																	F	1.50902	1.0356	0.737197	0.69244	0.750178	0.789678	#N/A	0.810343	#N/A	0.742583	#N/A	0.386813	0.266816
		H	1.48689	1.48689	1.48689	1.48689	1.48689	1.48682	1.48516	1.47151	1.44166	1.26169	1.14309	0.747518	0.454563																	H	0.905392	0.907001	1.45219	1.54291	1.59728	1.64197	#N/A	1.63503	#N/A	1.33129	#N/A	0.679703	0.0921624
		K	1.77909	1.77892	1.77843	1.77596	1.76397	1.70322	1.57318	1.35635	1.18199	0.810612	0.66323	0.327882	0.321721																	K	2.50971	2.51487	2.16488	1.87451	1.6235	1.43731	1.02003	0.897429	0.781751	0.527952	0.449216	0.204614	0.129959
		M	3.95464	3.95422	3.95227	3.94197	3.87194	3.8186	3.02356	2.34435	1.91114	1.22926	0.967877	0.691646	0.537201																	M	3.82843	4.11443	4.13128	3.96316	3.81617	3.42745	2.01894	2.43681	1.05943	1.35054	0.189187	0.661454	0.425403
		MS	0.830174	0.830174	0.830174	0.830174	0.830187	0.830619	0.833594	0.842742	0.85939	0.94592	1.01736	1.0982	1.01161																	MS	0.800424	0.864711	0.832515	0.725875	0.793255	0.915999	#N/A	0.976959	#N/A	0.925985	#N/A	0.97063	0.92273
		P	4.62274	4.50675	4.39515	4.23165	4.01244	3.73047	3.45542	3.09007	2.77673	2.00651	1.76246	0.942653	1.05547																	P	1.46627	2.53295	3.26724	3.58407	3.66138	3.45903	#N/A	2.97812	#N/A	1.99577	#N/A	0.789296	0.387177
		S1	1.34258	1.34258	1.34258	1.34259	1.34273	1.3446	1.34888	1.34294	1.31756	1.1603	1.03791	0.618752	0.161577																	S1	1.4212	1.29428	1.13427	1.19214	1.39706	1.49899	1.28155	1.42178	1.31886	1.33716	0.972909	0.536784	0.396585
		S2	0.714102	0.714102	0.714102	0.714102	0.714124	0.719096	0.722077	0.72409	0.715151	0.646489	0.581016	0.328759	0.222893																	S2	0.614341	0.608489	0.679488	0.753193	0.80742	0.788325	#N/A	0.550197	#N/A	0.458333	#N/A	0.349749	0.228862
			2000	1500	1250	1000	750	500	350	250	200	125	100	50	0.0100008																		2000	1500	1250	1000	750	500	350	250	200	125	100	50	0.0100008
	Fit_SD	Arbequina	0.872339	0.872312	0.872199	0.871633	0.868798	0.854819	0.826278	0.778826	0.73267	0.584894	0.490314	0.11596	-1.01953																Experimental_SD	Arbequina	0.876644	0.862058	0.844986	0.934884	0.794044	0.856373	#N/A	0.701761	#N/A	0.706336	#N/A	0.468497	-0.928947
		Arbosana	1.93368	1.93368	1.93368	1.93368	1.93368	1.93367	1.93337	1.93561	1.92259	1.80312	1.6689	0.932442	-0.933658																	Arbosana	1.97288	1.92375	1.96901	1.98683	2.11803	1.95962	#N/A	1.90772	#N/A	1.76416	#N/A	0.987487	-0.960343
		Cornicabra	6.0123	6.01229	6.01221	6.01155	6.00607	5.9578	5.80323	5.48365	5.15922	4.21124	3.67044	2.01773	-0.570916																	Cornicabra	5.54675	5.76064	6.04396	6.21672	6.27281	6.23396	#N/A	5.86384	#N/A	4.47986	#N/A	2.41413	0.577952
		Chemlali	0.742233	0.742233	0.742233	0.742233	0.742233	0.74222	0.741916	0.73947	0.734172	0.699315	0.666411	0.501032	-0.641602																	Chemlali	0.760123	0.769037	0.747811	0.773958	0.753314	0.762118	#N/A	0.754022	#N/A	0.612262	#N/A	0.371727	-0.665087
		Cornezuelo de Jaén	0.30376	0.30376	0.30376	0.30376	0.30376	0.30376	0.30376	0.30376	0.30376	0.30376	0.30376	0.30376	-0.583566																	Cornezuelo de Jaén	0.417806	0.430546	0.585207	0.762461	0.712389	0.7584	#N/A	0.912421	#N/A	0.976492	#N/A	0.539534	-0.641925
		Empeltre	0.382223	0.382223	0.382223	0.382223	0.382223	0.382222	0.382168	0.38144	0.379277	0.361237	0.342674	0.249283	-0.858625																	Empeltre	0.474835	0.484927	0.443316	0.397944	0.412706	0.401969	#N/A	0.46108	#N/A	0.347641	#N/A	0.0520786	-0.698456
		Frantoio	0.828666	0.828666	0.828666	0.828666	0.828666	0.828666	0.828666	0.828661	0.828613	0.826365	0.820279	0.71215	-0.759942																	Frantoio	0.670711	0.690092	0.763308	0.923497	1.04693	1.14792	#N/A	1.28182	#N/A	1.3434	#N/A	0.950879	-0.760572
		Hojiblanca	0.512948	0.512948	0.512948	0.512948	0.512948	0.512948	0.512901	0.51204	0.498991	0.47377	0.429398	0.150565	-0.830926																	Hojiblanca	0.654931	0.715293	0.531239	0.519607	0.529309	0.528816	#N/A	0.486011	#N/A	0.418481	#N/A	0.294655	-0.75152
		Koroneiki	0.377315	0.377315	0.377315	0.377315	0.377315	0.377315	0.377316	0.377302	0.377204	0.374649	0.369707	0.320201	-0.352247																	Koroneiki	0.171717	0.261276	0.30704	0.367574	0.449737	0.495481	#N/A	0.486909	#N/A	0.455033	#N/A	0.295739	-0.422823
		Martina	4.22246	4.22246	4.22246	4.22242	4.22174	4.20866	4.13261	3.91193	3.6483	2.81448	2.34756	1.00686	-0.857432																	Martina	3.53525	3.94786	4.17364	4.2151	4.16283	3.93006	#N/A	3.4295	#N/A	2.68763	#N/A	1.14797	-1.00869
		Manzanilla de Sevilla	1.38037	1.38037	1.38037	1.38037	1.38037	1.38038	1.37359	1.3773	1.36865	1.28139	1.19591	0.669332	-1.00991																	Manzanilla de Sevilla	0.907899	1.10165	1.32477	1.45224	1.60552	1.60516	#N/A	1.55244	#N/A	1.40637	#N/A	0.693243	-1.07844
		Picual	0.804445	0.802704	0.799564	0.791752	0.772891	0.665026	0.686712	0.648475	0.626706	0.589003	0.571199	0.46875	-0.675305																	Picual	0.796426	0.729889	0.418885	0.491029	0.532972	0.421218	#N/A	0.305002	#N/A	0.298826	#N/A	0.377437	-0.719804
		Sikitita 1	1.12733	1.12733	1.12733	1.12733	1.12733	1.12733	1.12726	1.12604	1.12172	1.07383	1.01256	0.612652	-0.830872																	Sikitita 1	0.616229	0.744574	0.914115	1.15332	1.24844	1.39784	#N/A	1.32596	#N/A	1.18824	#N/A	0.595827	-0.605865
		Sikitita 2	3.34709	3.34709	3.34709	3.34709	3.34705	3.34519	3.32837	3.25683	3.14477	2.65902	2.31563	1.13011	-0.761761																	Sikitita 2	3.16887	3.47559	3.60289	3.63451	3.73355	3.69331	#N/A	3.41371	#N/A	2.79168	#N/A	1.29553	-0.768384
	Fit_SD_Desv.St	AE	0.371905	0.371912	0.371941	0.372087	0.37289	0.378115	0.390652	0.39996	0.396521	0.366992	0.371078	0.468653	0.49883																Experimental_SD_Desv.St	AE	0.395189	0.411183	0.313216	0.407884	0.387733	0.40064	#N/A	0.519253	#N/A	0.476209	#N/A	0.2736	0.22395
		AO	0.53102	0.53102	0.53102	0.53102	0.53102	0.531019	0.530938	0.522357	0.5173	0.472974	0.432109	0.310737	0.143298																	AO	0.42123	0.457028	0.503651	0.534631	0.609729	0.473745	#N/A	0.477024	#N/A	0.445236	#N/A	0.259863	0.160465
		C	2.89516	2.89514	2.89502	2.89399	2.88561	2.81627	2.62139	2.29604	2.03888	1.58026	1.45864	1.23993	0.913502																	C	2.76577	2.54323	2.55519	2.50934	2.46493	2.36901	#N/A	2.31316	#N/A	1.57675	#N/A	1.67557	2.12305
		CH	0.242448	0.242448	0.242448	0.242448	0.242448	0.242435	0.242153	0.240111	0.236625	0.227861	0.233755	0.33354	0.222041																	CH	0.246513	0.253558	0.188757	0.177176	0.219102	0.219852	#N/A	0.261549	#N/A	0.318727	#N/A	0.22178	0.214488
		CJ	0.129503	0.129503	0.129503	0.129503	0.129503	0.129503	0.129503	0.129503	0.129503	0.129503	0.129503	0.129503	0.188298																	CJ	0.0580304	0.100604	0.258982	0.37524	0.597178	0.828615	#N/A	0.858454	#N/A	0.811742	#N/A	0.527218	0.113147
		E	0.31844	0.31844	0.31844	0.31844	0.31844	0.318439	0.318391	0.317743	0.315858	0.302694	0.294249	0.315884	0.0470487																	E	0.358517	0.358865	0.285875	0.24247	0.313324	0.219865	#N/A	0.2578	#N/A	0.262176	#N/A	0.588848	0.280575
		F	0.530492	0.530492	0.530492	0.530492	0.530492	0.530492	0.530492	0.530493	0.530503	0.530703	0.53072	0.519294	0.505046																	F	0.382236	0.408855	0.492052	0.558825	0.778818	0.865645	#N/A	1.02261	#N/A	0.99513	#N/A	0.697986	0.452382
		H	0.258004	0.258004	0.258004	0.258004	0.258004	0.258003	0.257935	0.256775	0.255513	0.216279	0.180981	0.214798	0.5501																	H	0.397815	0.34395	0.406073	0.377469	0.416713	0.440142	#N/A	0.420026	#N/A	0.435229	#N/A	0.411549	0.409173
		K	0.347661	0.347661	0.347661	0.347661	0.347661	0.347661	0.347663	0.347638	0.347454	0.342696	0.333525	0.244713	0.110138																	K	0.0651361	0.10972	0.1342	0.188854	0.276304	0.372168	#N/A	0.373405	#N/A	0.311749	#N/A	0.251678	0.0464337
		M	1.54987	1.54987	1.54986	1.54983	1.54921	1.53659	1.47613	1.32028	1.15603	0.746345	0.584136	0.363453	0.375029																	M	1.50514	1.61152	1.6134	1.54469	1.37643	1.34291	#N/A	1.1561	#N/A	0.777579	#N/A	0.468394	0.302853
		MS	1.12081	1.12081	1.12081	1.12081	1.12081	1.12082	1.11082	1.117	1.1071	1.01752	0.946718	0.607746	0.581167																	MS	0.792504	0.849292	0.884128	0.983017	0.998296	1.01037	#N/A	0.967675	#N/A	0.913814	#N/A	0.530489	0.508729
		P	0.496486	0.495043	0.492523	0.486724	0.475615	0.497074	0.481325	0.51248	0.536675	0.583343	0.59918	0.579745	0.142078																	P	0.401508	0.333116	0.50824	0.186788	0.241232	0.224132	#N/A	0.184805	#N/A	0.207654	#N/A	0.168028	0.262345
		S1	0.654289	0.654289	0.654289	0.654289	0.654289	0.654288	0.654219	0.653054	0.649061	0.608841	0.562149	0.299962	0.0889092																	S1	0.742742	0.802078	0.955033	1.14711	1.18139	1.33517	#N/A	1.34844	#N/A	1.23862	#N/A	0.57265	0.330047
		S2	1.08663	1.08663	1.08663	1.08663	1.08656	1.0841	1.0642	0.993222	0.902392	0.637392	0.516582	0.276378	0.274612																	S2	1.33828	1.36144	1.33157	1.54425	1.3491	1.30357	#N/A	1.16316	#N/A	0.847841	#N/A	0.310932	0.2864

## Sheet: Figure 2_Curves ETR
	Fit curves																														Experiemental data curves
			2000	1500	1250	1000	750	500	350	250	200	125	100	50	0.0100008																		2000	1500	1250	1000	750	500	350	250	200	125	100	50	0.0100008
	Fit_C	Arbequina	63.7609	63.7604	63.7568	63.7315	63.5489	62.2138	58.6749	52.6347	47.4137	35.0782	29.4038	15.4674	-1.02781																Experimental_C	Arbequina	43.572	54.0506	61.7742	67.8807	70.8657	67.8327	61.2457	#N/A	47.1142	#N/A	28.3157	14.9077	0
		Arbosana	60.1389	60.1388	60.1381	60.1311	60.0616	59.3526	56.9455	52.0665	47.4191	35.6472	30.047	16.1355	-0.381792																	Arbosana	26.2753	39.5218	46.7711	51.1431	53.4934	53.4034	50.6921	#N/A	42.2807	#N/A	27.7173	15.174	0
		Cornicabra	53.3325	53.3325	53.3324	53.3313	53.3144	53.0448	51.7815	48.5536	45.0125	34.8687	29.6649	16.147	-0.430471																	Cornicabra	33.6597	43.3284	49.2753	52.8267	53.9933	53.4035	51.8965	#N/A	44.8003	#N/A	28.564	15.1664	0
		Chemlali	87.693	87.6896	87.6736	87.5805	87.0256	83.6643	76.0181	64.69	56.0157	38.4025	31.3107	15.6358	-1.24431																	Chemlali	53.4831	64.4178	70.1172	73.2532	74.7194	72.9087	66.8758	#N/A	50.5571	#N/A	28.9368	15.1056	0
		Cornezuelo de Jaén	35.0858	35.0858	35.0858	35.0857	35.0836	35.0296	34.6845	33.5675	32.1152	26.9652	23.7974	13.9993	-0.272722																	Cornezuelo de Jaén	25.819	30.8536	34.0315	37.0972	38.852	39.2404	38.2869	#N/A	34.3194	#N/A	24.8973	14.1564	0
		Empeltre	93.2759	93.2722	93.2533	93.1407	92.4649	88.4524	79.6431	67.0691	57.7017	39.1538	31.8144	15.7596	-1.39189																	Empeltre	65.0554	82.6425	91.2394	96.1453	98.9705	93.0797	80.2198	#N/A	55.811	#N/A	30.3802	15.6156	0
		Frantoio	28.6477	28.6477	28.6477	28.6477	28.6476	28.6453	28.6046	28.3385	27.8098	24.9437	22.6668	14.1794	-0.0349844																	Frantoio	18.775	23.0988	25.1021	27.2247	29.0208	30.2532	29.887	#N/A	27.8062	#N/A	22.5432	13.9393	0
		Hojiblanca	85.9359	85.9325	85.9153	85.8139	85.2109	81.6455	73.7894	62.4839	53.9946	37.0413	30.2895	15.4592	-0.436008																	Hojiblanca	58.1762	76.7345	84.9298	89.9168	90.4183	84.2811	73.9982	#N/A	54.5343	#N/A	31.1946	16.2129	0
		Koroneiki	35.5961	35.5961	35.5961	35.596	35.5932	35.5276	35.1201	33.8229	32.1633	26.4892	23.1508	13.4176	0.179669																	Koroneiki	21.3716	28.6894	32.3743	35.4894	37.0595	37.2067	36.0435	#N/A	31.8161	#N/A	23.4065	13.4266	0
		Martina	51.8765	51.8765	51.8765	51.8764	51.8735	51.7797	51.1001	48.8048	45.8663	36.3042	31.034	16.7824	-1.17419																	Martina	17.2555	28.8604	37.1892	44.3536	50.459	54.702	56.4123	#N/A	48.3488	#N/A	29.4566	15.398	0
		Manzanilla de Sevilla	26.1253	26.1253	26.1253	26.1253	26.1253	26.1231	26.0818	25.8006	25.2428	22.3182	20.0876	12.2323	-0.113255																	Manzanilla de Sevilla	16.5313	21.9002	22.7705	25.0755	26.9226	27.5183	27.7647	#N/A	25.9292	#N/A	20.0716	11.9745	0
		Picual	82.1595	82.1568	82.1437	82.0668	81.6048	78.7787	72.2313	62.2622	54.4228	37.999	31.2175	15.9672	-0.6914																	Picual	42.4038	56.8748	60.7438	70.894	88.3292	72.0266	59.0762	#N/A	49.0397	#N/A	29.2475	15.4039	0
		Sikitita 1	60.7412	60.7411	60.7408	60.7374	60.6963	60.181	58.1512	53.6001	49.0173	36.9418	31.0885	16.4491	-0.978692																	Sikitita 1	31.9109	48.5342	56.0694	61.1919	64.2238	63.8444	61.2258	#N/A	49.6734	#N/A	29.8854	15.5985	0
		Sikitita 2	82.1159	82.1148	82.1079	82.0605	81.7276	79.3537	73.2662	63.4537	55.5415	38.7639	31.8126	16.1882	-0.854514																	Sikitita 2	57.4907	76.6456	82.0472	84.1604	83.9502	80.3383	74.0234	#N/A	55.6804	#N/A	30.7202	15.7534	0
	Fit_C_Desv.St	AE	21.0087	21.0081	21.0044	20.9786	20.7947	19.5098	16.4139	11.956	8.85379	3.93313	2.61494	0.960021	0.535244																Experimental_C_Desv.St	AE	15.9209	19.4897	21.3651	23.7075	23.8418	20.3322	15.2104	#N/A	7.19078	#N/A	2.064	0.803874	0
		AO	10.9707	10.9706	10.97	10.9647	10.9125	10.4067	8.87939	6.34879	4.46481	1.43378	0.697054	0.384902	0.763022																	AO	5.86982	8.95365	11.8503	13.3479	14.2587	13.7818	12.0427	#N/A	7.22845	#N/A	2.21754	0.591858	0
		C	10.8996	10.8996	10.8996	10.8989	10.8889	10.7438	10.1646	8.99083	7.96872	5.77054	4.84233	2.61249	0.13789																	C	0.894407	5.09964	6.49633	6.96697	6.23203	5.28498	4.60998	#N/A	2.85048	#N/A	0.763486	0.232559	0
		CH	9.98234	9.97854	9.96224	9.88088	9.49342	7.84993	5.403	3.13068	2.00089	0.678139	0.390259	0.045057	0.124471																	CH	11.46	9.57461	11.1585	12.231	13.421	12.9079	10.0565	#N/A	4.17494	#N/A	0.857379	0.304088	0
		CJ	10.8331	10.8331	10.8331	10.833	10.8305	10.7692	10.4023	9.35877	8.20182	5.18999	3.90281	1.49781	0.219194																	CJ	9.45956	11.2487	11.4831	12.4847	12.3459	12.0684	11.3617	#N/A	8.68029	#N/A	3.53288	0.977779	0
		E	5.05434	5.05186	5.04143	4.99082	4.75909	3.83392	2.56313	1.50779	1.04631	0.544928	0.407978	0.142411	0.305509																	E	4.87026	4.70746	4.96381	5.42903	5.2079	4.06913	2.40965	#N/A	0.660176	#N/A	0.0346338	0.020555	0
		F	3.49204	3.49204	3.49204	3.49204	3.49203	3.49065	3.46848	3.34309	3.13504	2.37398	1.98993	1.14688	0.127995																	F	5.3899	3.58616	3.98132	3.47145	3.36692	2.90671	2.84989	#N/A	2.64408	#N/A	1.98678	0.894037	0
		H	9.05558	9.05344	9.04341	8.98942	8.71185	7.43492	5.39801	3.39199	2.34185	1.00724	0.669053	0.145776	0.270032																	H	7.51615	10.8709	12.893	14.3646	14.1706	12.3099	10.1049	#N/A	7.13517	#N/A	4.03021	2.09208	0
		K	7.94238	7.94238	7.94238	7.94232	7.94084	7.90379	7.68163	7.06815	6.41998	4.82392	4.11445	2.31695	0.317901																	K	6.08623	8.27072	9.26902	9.66893	9.68882	9.05416	7.93906	#N/A	6.25031	#N/A	3.57621	1.67333	0
		M	2.2236	2.2236	2.2236	2.22354	2.22213	2.18968	2.02089	1.61945	1.24584	0.504665	0.275588	0.00701751	0.0233753																	M	4.32916	2.79026	3.19844	3.31024	2.40337	1.82946	1.57918	#N/A	0.589655	#N/A	0.41809	0.082315	0
		MS	4.84292	4.84292	4.84292	4.84292	4.84292	4.84195	4.82542	4.72812	4.55672	3.80462	3.31145	1.84244	0.123539																	MS	4.52989	4.20796	4.15764	4.78617	4.61728	5.20769	5.33143	#N/A	4.94587	#N/A	3.34547	1.63213	0
		P	15.7765	15.7736	15.7602	15.6867	15.2912	13.3153	9.83321	6.05856	3.95711	1.27482	0.670803	0.348895	0.880911																	P	15.435	23.117	27.6807	23.3786	40.6149	20.9078	19.3645	#N/A	8.4661	#N/A	1.68121	0.351396	0
		S1	11.2243	11.2243	11.224	11.2211	11.1875	10.8095	9.54665	7.29441	5.52288	2.41919	1.50651	0.292306	0.393703																	S1	8.85062	12.0705	11.5014	10.9472	11.0093	10.2471	9.37782	#N/A	5.20458	#N/A	0.835738	0.208834	0
		S2	9.79469	9.79364	9.78788	9.75196	9.53744	8.37952	6.27245	3.98025	2.70532	1.04178	0.635223	0.0922417	0.193304																	S2	6.53233	9.97195	9.64888	9.94364	9.42899	8.3541	6.45962	#N/A	2.45935	#N/A	0.362395	0.133055	0
			2000	1500	1250	1000	750	500	350	250	200	125	100	50	0.0100008																		2000	1500	1250	1000	750	500	350	250	200	125	100	50	0.0100008
	Fit_MD	Arbequina	42.5891	42.5891	42.5891	42.5889	42.5843	42.484	41.8824	40.0466	37.8012	30.6359	26.6409	15.2835	-0.439559																Experimental_MD	Arbequina	30.2817	39.4479	43.4681	46.7436	49.1498	50.5054	#N/A	47.7274	#N/A	33.667	#N/A	14.9475	0
		Arbosana	34.2469	34.2469	34.2469	34.2469	34.2468	34.237	34.1152	33.4955	32.4544	27.8621	24.7217	14.5982	-0.21244																	Arbosana	14.2858	21.5335	24.898	27.9573	30.6004	32.4237	34.5776	30.7426	32.58	25.7056	25.1092	14.0345	0
		Cornicabra	61.9083	63.6757	63.6699	63.6363	63.4303	62.0754	58.5802	52.5738	47.3382	34.9647	29.3175	15.6141	-0.389287																	Cornicabra	38.323	52.3994	59.926	63.8896	65.8977	64.735	#N/A	53.7638	#N/A	34.1847	#N/A	14.7968	0
		Chemlali	29.6827	29.6827	29.6827	29.6827	29.6827	29.6789	29.6192	29.2603	28.5894	25.228	22.7077	13.8386	-0.236915																	Chemlali	17.8268	24.4077	25.9609	27.6451	28.9564	29.931	#N/A	29.515	#N/A	25.8188	#N/A	13.2295	0
		Cornezuelo de Jaén	29.5912	29.5912	29.5912	29.5912	29.5911	29.5884	29.546	29.2812	28.7635	25.9645	23.7191	15.0849	-0.296397																	Cornezuelo de Jaén	16.4229	21.0621	24.0705	26.7553	29.3428	31.422	#N/A	31.5142	#N/A	27.6921	#N/A	14.2575	0
		Empeltre	45.4595	45.4595	45.4595	45.4588	45.4482	45.2669	44.3683	41.9643	39.2417	31.1498	26.8592	15.1943	-0.597141																	Empeltre	34.5815	41.4017	45.4914	49.1996	51.505	52.5561	#N/A	48.8212	#N/A	34.0008	#N/A	14.8572	0
		Frantoio	41.8194	41.8194	41.8194	41.8193	41.8171	41.7586	41.3565	39.9653	38.0925	31.4126	27.4047	15.6527	-0.314643																	Frantoio	25.688	31.0451	34.8785	37.8074	40.0804	41.5485	#N/A	40.5689	#N/A	32.2003	#N/A	14.9433	0
		Hojiblanca	39.8428	39.8428	39.8428	39.8428	39.8417	39.8046	39.5145	38.4179	36.8544	30.8996	27.1487	15.6784	-0.494411																	Hojiblanca	25.1889	32.0687	36.5274	41.0036	44.3058	46.795	#N/A	43.6306	#N/A	31.0049	#N/A	14.3269	0
		Koroneiki	46.6009	46.6009	46.6009	46.6007	46.5974	46.5054	45.8865	43.8647	41.304	32.9703	28.3495	15.745	-0.281862																	Koroneiki	13.4237	19.6315	25.6079	29.7016	33.1645	34.8325	#N/A	32.545	#N/A	25.9865	#N/A	13.6994	0
		Martina	41.3819	41.3819	41.3819	41.3817	41.3774	41.2785	40.6922	38.9377	36.8125	30.0005	26.1466	15.0512	-0.173591																	Martina	19.2781	29.7185	34.9342	38.0051	40.0466	41.184	48.5987	36.7695	41.789	28.6144	27.6131	14.162	0
		Manzanilla de Sevilla	40.3067	40.3067	40.3067	40.3067	40.3051	40.259	39.9085	38.6178	36.8274	30.3322	26.4263	15.0464	-0.262524																	Manzanilla de Sevilla	20.8673	28.1509	32.1146	35.0909	37.2938	38.7979	#N/A	36.9463	#N/A	29.3549	#N/A	14.3848	0
		Picual	46.733	46.7329	46.7319	46.7237	46.6481	45.9419	43.7301	39.6142	35.9764	27.4838	23.6022	13.5841	0.00202262																	Picual	20.0182	30.7814	34.3492	38.7752	41.8512	41.7892	#N/A	36.1804	#N/A	25.3668	#N/A	13.1946	0
		Sikitita 1	45.0867	45.0867	45.0867	45.086	45.0769	44.9383	44.2529	42.3139	39.9739	32.3799	28.064	15.7974	-0.570302																	Sikitita 1	20.0186	29.2857	35.6828	39.8683	43.0128	45.6966	52.2668	39.684	45.4959	31.8413	28.2469	14.8272	0
		Sikitita 2	27.2574	27.2574	27.2574	27.2574	27.2574	27.2565	27.2337	27.0506	26.6448	24.1975	22.1305	14.0208	-0.179392																	Sikitita 2	13.225	20.1404	23.528	25.1089	27.1787	29.0864	#N/A	29.8914	#N/A	25.2693	#N/A	13.507	0
	Fit_MD_Desv.St	AE	14.5098	14.5098	14.5098	14.5095	14.5048	14.4116	13.9186	12.5882	11.1139	7.0563	5.17905	1.51731	0.442072																Experimental_MD_Desv.St	AE	8.36303	8.76902	9.08932	8.78176	8.63812	7.9505	#N/A	7.02627	#N/A	2.60776	#N/A	0.651674	0
		AO	4.79558	4.79558	4.79558	4.79558	4.7954	4.78608	4.69802	4.36127	3.91983	2.60207	1.996	0.809337	0.288028																	AO	2.54617	3.38039	3.74462	3.93639	3.84818	4.30063	1.2829	4.59458	0.64423	2.96702	0.23413	0.579758	0
		C	17.0138	17.0411	17.0327	16.9871	16.7372	15.3941	12.7161	9.31836	7.14047	3.94729	3.09183	1.59505	0.229155																	C	7.35711	11.6925	15.5194	16.429	16.5176	15.2462	#N/A	8.19365	#N/A	2.86262	#N/A	0.848895	0
		CH	5.98095	5.98095	5.98095	5.98095	5.98092	5.97747	5.92931	5.68478	5.29811	3.85763	3.0627	1.2562	0.185586																	CH	1.0076	4.40441	5.59462	5.733	5.81641	5.9426	#N/A	5.78335	#N/A	4.22321	#N/A	0.805977	0
		CJ	6.92489	6.92489	6.92489	6.92489	6.92485	6.9217	6.87888	6.6518	6.27053	4.68602	3.71661	1.44014	0.190463																	CJ	6.41204	6.48426	6.55804	7.05971	7.26205	7.18805	#N/A	6.09191	#N/A	4.0009	#DIV/0!	1.0771	0
		E	17.2562	17.2562	17.2562	17.2555	17.2447	17.0764	16.3358	14.62	12.9101	8.57383	6.56827	2.1575	0.421168																	E	6.92594	9.06708	10.0356	9.80158	9.5903	9.30076	#N/A	7.33752	#N/A	2.30038	#N/A	0.397431	0
		F	6.33329	6.33329	6.33329	6.33319	6.3308	6.27282	5.93989	5.06646	4.19841	2.42725	1.89418	0.983943	0.401594																	F	7.33991	7.74396	7.19965	6.71444	6.00453	5.1955	#N/A	4.4917	#N/A	2.18458	#N/A	0.286132	0
		H	8.38896	8.38896	8.38896	8.38892	8.38777	8.35246	8.11449	7.39711	6.58956	4.51475	3.6351	1.80314	0.285757																	H	3.4947	7.59737	10.5157	12.419	13.9572	14.8577	#N/A	11.5778	#N/A	3.67171	#N/A	0.563463	0
		K	2.77578	2.77578	2.77578	2.77566	2.77291	2.71283	2.40919	1.70733	1.0768	0.0596534	0.334094	0.370619	0.311243																	K	3.47545	6.57323	10.0496	13.816	15.2038	15.6862	#N/A	12.5752	#N/A	7.10649	#N/A	1.67236	0
		M	9.99466	9.99466	9.99465	9.99447	9.99079	9.91369	9.49784	8.39498	7.23142	4.43528	3.36919	1.58138	0.150673																	M	10.184	10.9923	12.0119	11.5457	11.1783	10.4379	0	8.09961	0	3.86945	0	0.789569	0
		MS	5.71133	5.71133	5.71133	5.71122	5.70883	5.65322	5.34551	4.55471	3.76852	2.09519	1.55067	0.754949	0.0735631																	MS	4.74516	5.52929	5.40153	5.43812	5.37376	5.02678	#N/A	4.09157	#N/A	2.30456	#N/A	0.694866	0
		P	27.7321	27.732	27.731	27.7228	27.6492	26.9778	24.9227	21.1695	17.9069	10.7005	7.81094	2.51104	0.430648																	P	10.0734	15.9183	19.506	23.3271	24.9141	24.5963	#N/A	19.4517	#N/A	10.1859	#N/A	2.03152	0
		S1	11.4879	11.4879	11.4878	11.4865	11.4693	11.2484	10.4024	8.65116	7.06155	3.66389	2.45217	0.698575	0.323407																	S1	5.8244	7.06867	7.74351	7.80556	8.4587	9.75368	8.58814	6.85179	4.35544	3.24964	1.03582	0.608939	0
		S2	2.76052	2.76052	2.76052	2.76052	2.76051	2.75991	2.74694	2.65633	2.48199	1.69013	1.20784	0.30787	0.123823																	S2	3.14829	2.90954	1.80154	1.96776	1.9619	1.70122	#N/A	1.4041	#N/A	1.01192	#N/A	0.230136	0
			2000	1500	1250	1000	750	500	350	250	200	125	100	50	0.0100008																		2000	1500	1250	1000	750	500	350	250	200	125	100	50	0.0100008
	Fit_SD	Arbequina	23.2211	23.2211	23.2211	23.2211	23.221	23.2176	23.1757	22.9604	22.582	20.6613	19.1078	12.6788	-0.0293632																Experimental_SD	Arbequina	11.541	16.3091	18.1904	20.2612	21.9694	23.6546	#N/A	23.3481	#N/A	21.0341	#N/A	12.4105	0
		Arbosana	28.3754	28.3754	28.3754	28.3754	28.3753	28.3721	28.321	28.011	27.4243	24.4158	22.1095	13.759	0.0727257																	Arbosana	13.7456	19.2749	21.9202	23.7981	26.4597	27.7249	#N/A	26.8537	#N/A	23.0719	#N/A	13.5402	0
		Cornicabra	64.0617	64.0616	64.061	64.0542	63.9816	63.1885	60.3976	54.7043	49.3522	36.2662	30.2782	15.9319	-0.531113																	Cornicabra	32.3177	47.0461	54.2982	59.4144	61.9461	63.4881	#N/A	55.4994	#N/A	35.4023	#N/A	15.1751	0
		Chemlali	23.2695	23.2695	23.2695	23.2695	23.2695	23.2689	23.2558	23.1419	22.8744	21.1135	19.5219	12.7537	-0.178069																	Chemlali	15.3782	20.6399	22.7861	25.0816	26.5182	27.5793	#N/A	27.4969	#N/A	24.465	#N/A	12.6276	0
		Cornezuelo de Jaén	13.9319	13.9319	13.9319	13.9319	13.9319	13.9319	13.9312	13.9202	13.8814	13.4675	12.9582	9.79106	-0.0353083																	Cornezuelo de Jaén	4.44117	8.4343	10.6984	11.4933	12.5817	13.3076	#N/A	14.1054	#N/A	13.5866	#N/A	9.35474	0
		Empeltre	2.75934	2.75934	2.75934	2.75934	2.75934	2.75934	2.75933	2.75889	2.75675	2.72407	2.67628	2.34082	-6.8146e-05																	Empeltre	0.135121	2.36951	3.29199	4.14764	4.6291	4.82405	#N/A	5.12965	#N/A	4.95377	#N/A	3.68032	0
		Frantoio	31.9119	31.9119	31.9119	31.9118	31.9103	31.876	31.667	30.9742	30.0189	26.2165	23.6154	14.6131	-0.122068																	Frantoio	14.8061	18.1739	20.1038	22.667	25.2172	26.5547	#N/A	26.9135	#N/A	23.5006	#N/A	13.289	0
		Hojiblanca	25.6453	25.6453	25.6453	25.6453	25.6453	25.6424	25.5949	25.3	24.7414	21.9125	19.7775	12.2003	0.0257227																	Hojiblanca	19.0126	21.9987	23.359	25.2372	25.7602	26.7634	#N/A	25.4888	#N/A	21.7664	#N/A	12.2794	0
		Koroneiki	18.9122	18.9122	18.9122	18.9122	18.9122	18.9122	18.9106	18.8879	18.8163	18.1424	17.3682	12.9097	-0.0674221																	Koroneiki	8.30527	12.9216	17.2039	19.9783	22.7203	23.9292	#N/A	23.4386	#N/A	20.0986	#N/A	12.2942	0
		Martina	28.6896	28.6896	28.6896	28.6896	28.6895	28.6808	28.5893	28.1596	27.4515	24.2398	21.9197	13.6948	0.0045557																	Martina	10.2725	18.6997	22.5669	25.6134	26.95	28.8439	#N/A	28.3909	#N/A	24.419	#N/A	13.6633	0
		Manzanilla de Sevilla	25.077	25.077	25.077	25.077	25.077	25.0754	25.0473	24.8671	24.5107	22.5248	20.8605	13.8918	-0.0546512																	Manzanilla de Sevilla	13.4794	17.8749	20.4413	22.7166	24.3502	25.5921	#N/A	25.6216	#N/A	22.843	#N/A	13.7317	0
		Picual	12.3768	12.3768	12.3768	12.3768	12.3767	12.3741	12.3568	12.2955	12.1971	11.5982	10.9904	7.77386	0.114769																	Picual	11.4601	14.3286	14.7253	14.9976	16.1822	16.3139	#N/A	16.1475	#N/A	14.6401	#N/A	10.541	0
		Sikitita 1	24.669	24.669	24.669	24.669	24.669	24.6671	24.6362	24.4423	24.065	22.0208	20.3572	13.6919	-0.17565																	Sikitita 1	11.6942	17.5	21.4191	23.8646	25.2811	27.7155	#N/A	28.0237	#N/A	24.8173	#N/A	13.8002	0
		Sikitita 2	29.0585	29.0585	29.0585	29.0585	29.0585	29.0563	29.0191	28.7686	28.2612	25.444	23.1687	14.5343	-0.227578																	Sikitita 2	15.1739	22.515	25.6471	28.9811	30.4669	32.2053	#N/A	31.9138	#N/A	26.8832	#N/A	14.0891	0
	Fit_SD_Desv.St	AE	9.86283	9.86283	9.86283	9.86282	9.86272	9.85636	9.78282	9.43568	8.89121	6.78079	5.54589	2.56619	0.217302																Experimental_SD_Desv.St	AE	4.00955	5.19034	5.56932	6.64082	7.42567	8.54823	#N/A	8.48914	#N/A	6.54457	#N/A	2.04479	0
		AO	4.08828	4.08828	4.08828	4.08828	4.08824	4.08487	4.03929	3.81242	3.46018	2.22101	1.61525	0.666595	0.125183																	AO	2.51241	4.28596	4.92048	5.37683	5.39225	5.90617	#N/A	4.96348	#N/A	3.49606	#N/A	1.27474	0
		C	9.02902	9.02899	9.02868	9.02544	8.99186	8.66481	7.72952	6.3308	5.38011	3.7624	3.14537	1.65407	0.510751																	C	9.86599	11.6171	11.0773	8.99579	7.16657	6.92417	#N/A	3.16197	#N/A	0.948502	#N/A	0.238238	0
		CH	4.59246	4.59246	4.59246	4.59246	4.59245	4.59201	4.58192	4.50693	4.35449	3.59935	3.09467	1.75953	0.142162																	CH	2.89819	5.14105	5.81307	6.64193	7.11007	7.17862	#N/A	6.9875	#N/A	5.4166	#N/A	1.74549	0
		CJ	4.63132	4.63132	4.63132	4.63132	4.63132	4.63131	4.63062	4.61926	4.58156	4.23264	3.86239	2.26122	0.0324767																	CJ	1.32403	1.89827	2.94778	3.78077	4.41509	4.31562	#N/A	4.94406	#N/A	4.63755	#N/A	2.06219	0
		E	1.92179	1.92179	1.92179	1.92179	1.92179	1.92179	1.92176	1.92089	1.9166	1.85125	1.75567	1.08485	0.000136292																	E	3.4573	4.58265	4.27834	4.42129	4.47053	4.76542	#N/A	5.03326	#N/A	5.12344	#N/A	3.96751	0
		F	8.15443	8.15443	8.15442	8.15431	8.15195	8.10092	7.81803	7.04059	6.184	3.91071	2.92263	1.20289	0.310926																	F	4.78288	5.27337	6.5483	7.22451	7.95182	9.08625	#N/A	9.7574	#N/A	7.44013	#N/A	2.79251	0
		H	7.40504	7.40504	7.40504	7.40504	7.40504	7.40418	7.38599	7.26365	7.03295	5.96451	5.24309	2.98836	0.360695																	H	3.4527	4.54997	5.11649	5.54156	6.4332	6.97551	#N/A	6.99962	#N/A	5.86319	#N/A	1.80752	0
		K	5.27827	5.27827	5.27827	5.27827	5.27827	5.27824	5.27652	5.25408	5.18882	4.6659	4.15329	2.08214	0.0563529																	K	5.68393	8.19297	11.0289	13.806	15.1164	15.642	#N/A	12.8868	#N/A	8.01665	#N/A	2.05442	0
		M	5.78533	5.78533	5.78533	5.78533	5.78508	5.77387	5.67168	5.27357	4.72914	2.95262	2.06267	0.48542	0.146553																	M	4.3699	5.62515	6.84199	6.62376	6.74283	6.27749	#N/A	5.36779	#N/A	2.99038	#N/A	0.464789	0
		MS	7.12761	7.12761	7.12761	7.12761	7.12759	7.12507	7.08534	6.85509	6.4481	4.67611	3.57515	1.09009	0.119544																	MS	3.48651	4.70915	5.11061	5.99193	6.65106	7.1339	#N/A	6.44465	#N/A	4.14918	#N/A	0.832937	0
		P	5.93506	5.93506	5.93506	5.93507	5.93519	5.93852	5.95988	6.0233	6.08902	6.12343	5.96124	4.45672	0.154818																	P	0.573847	1.01533	0.80548	0.941419	1.07288	1.24637	#N/A	1.21625	#N/A	1.20182	#N/A	0.70924	0
		S1	10.2111	10.2111	10.2111	10.2111	10.2111	10.2085	10.1683	9.93678	9.52436	7.64623	6.3658	2.4318	0.198235																	S1	4.12524	5.2105	6.70141	7.25117	7.99637	8.40275	#N/A	7.73421	#N/A	5.68346	#N/A	1.30095	0
		S2	5.1206	5.1206	5.1206	5.1206	5.12056	5.11735	5.07393	4.85304	4.49833	3.13889	2.3793	0.797945	0.1345																	S2	4.16776	6.4944	7.24134	6.76093	8.39685	8.39948	#N/A	6.73086	#N/A	4.11895	#N/A	0.729943	0
